# Supplementary material for: Classification of divorce causes during the COVID-19 pandemic using convolutional neural networks
Source: PeerJ journal article supplement (doi:10.7717/peerj-cs.998), 2022-06-30
Supplement: KDRT_Dataset.zip [file KDRT_Dataset.zip]

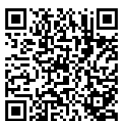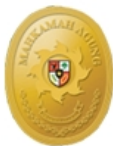

**SALINAN PUTUSAN**  
**Nomor 2335/Pdt.G/2020/PA.Tmk**

بِسْمِ اللَّهِ الرَّحْمَنِ الرَّحِيمِ

**DEMI KEADILAN BERDASARKAN KETUHANAN YANG MAHA ESA**

Pengadilan Agama Kota Tasikmalaya yang memeriksa dan mengadili perkara tertentu pada tingkat pertama dalam sidang majelis telah menjatuhkan putusan perkara cerai gugat antara:

**PENGUGAT**, umur 22 tahun, agama Islam, pekerjaan Mengurus Rumah Tangga, pendidikan SLTP, tempat kediaman Kota Tasikmalaya, sebagai **Penggugat**;

melawan

**TERGUGAT**, umur 27 tahun, agama Islam, pekerjaan Wiraswasta, pendidikan SD, tempat kediaman di Kab. Tasikmalaya., sebagai **Tergugat**;

Pengadilan Agama tersebut;

Telah mempelajari berkas perkara;

Telah mendengar keterangan Penggugat serta memeriksa bukti-bukti di persidangan;

**DUDUK PERKARA**

Bahwa Penggugat dengan surat gugatannya tanggal 08 Desember 2020 telah mengajukan gugatan cerai gugat yang didaftar di Kepaniteraan Pengadilan Agama Kota Tasikmalaya dengan Nomor 2335/Pdt.G/2020/PA.Tmk, tanggal 10 Desember 2020, dengan dalil-dalil yang pada pokoknya sebagai berikut:

1. Bahwa pada tanggal 15 April 2014 Penggugat dengan Tergugat melangsungkan pernikahan menurut Agama Islam diwilayah Kantor Urusan Agama Kecamatan Kawalu Kota Tasikmalaya, tercatat sebagaimana dalam Kutipan Salinan Putusan Perkara Isbat Nikah di Pengadilan Agama Kota Tasikmalaya Nomor: 004/Pdt.P/2017/PA.Tmk, tertanggal 08 Februari 2017;

Halaman 1 dari 11 halaman, Putusan Nomor 2335/Pdt.G/2020/PA.Tmk

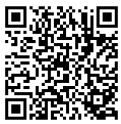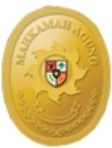

## Direktori Putusan Mahkamah Agung Republik Indonesia

putusan.mahkamahagung.go.id

2. Bahwa setelah pernikahan tersebut Penggugat dengan Tergugat bertempat tinggal di rumah orangtua Penggugat dan selama pernikahan tersebut Penggugat dengan Tergugat telah hidup rukun sebagaimana layaknya suami istri, dan dikaruniai 1 (satu) orang anak;
3. Bahwa rumah tangga antara Penggugat dengan Tergugat semula harmonis, namun pada akhir tahun 2017 sudah mulai goyah karena sering terjadi perselisihan yang terus menerus yang sulit untuk didamaikan, keadaan tersebut memuncak pada tahun 2018 sehingga menyebabkan pisah rumah kurang lebih 2 (dua) tahun;
4. Bahwa penyebab perselisihan dan pertengkaran tersebut dikarenakan sudah tidak ada kecocokan dalam rumah tangga antara Penggugat dengan Tergugat yang disebabkan karena Tergugat tidak memberikan nafkah kepada Penggugat dan Tergugat tidak bertanggungjawab, sehingga Penggugat tidak menerima keadaan tersebut;
5. Bahwa Penggugat telah berusaha untuk menyelesaikan kemelut rumah tangga dengan Tergugat dan melibatkan keluarga, tetapi tidak berhasil;
6. Bahwa atas kejadian tersebut, Penggugat sudah tidak sanggup lagi untuk hidup rukun membina rumah tangga dengan Tergugat dan apabila rumah tangga tersebut dilanjutkan akan lebih banyak madarat daripada maslahatnya;

Berdasarkan alasan/dalil-dalil diatas, maka Penggugat mohon kepada Ketua Pengadilan Agama Kota Tasikmalaya cq. Majelis Hakim yang memeriksa dan mengadili perkara ini, berkenan menjatuhkan putusan sebagai berikut :

1. Mengabulkan gugatan Penggugat;
2. Menjatuhkan talak satu yang kesatu bain sughra Tergugat (TERGUGAT) terhadap Penggugat (PENGGUGAT) di depan sidang Pengadilan Agama Kota Tasikmalaya;
3. Menetapkan biaya perkara menurut hukum;

Bahwa pada hari sidang yang telah ditetapkan Penggugat telah datang menghadap ke muka sidang, sedangkan Tergugat tidak datang menghadap ke

Halaman 2 dari 11 halaman, Putusan Nomor 2335/Pdt.G/2020/PA.Tmk

#### Disclaimer

Kepaniteraan Mahkamah Agung Republik Indonesia berusaha untuk selalu mencantumkan informasi paling kini dan akurat sebagai bentuk komitmen Mahkamah Agung untuk pelayanan publik, transparansi dan akuntabilitas pelaksanaan fungsi peradilan. Namun dalam hal-hal tertentu masih dimungkinkan terjadi permasalahan teknis terkait dengan akurasi dan keterkinian informasi yang kami sajikan, hal mana akan terus kami perbaiki dari waktu ke waktu. Dalam hal Anda menemukan inakurasi informasi yang termuat pada situs ini atau informasi yang seharusnya ada, namun belum tersedia, maka harap segera hubungi Kepaniteraan Mahkamah Agung RI melalui : Email : kepaniteraan@mahkamahagung.go.id Telp : 021-384 3348 (ext.318)

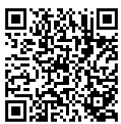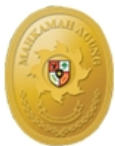

# Direktori Putusan Mahkamah Agung Republik Indonesia

putusan.mahkamahagung.go.id

muka sidang dan tidak menyuruh orang lain untuk menghadap sebagai wakil/kuasa hukumnya meskipun telah dipanggil secara resmi dan patut menurut relaas Nomor 2335/Pdt.G/2020/PA.Tmk tanggal 16 Desember 2020 yang dibacakan di dalam sidang, sedangkan tidak ternyata bahwa tidak datangnya itu disebabkan suatu halangan yang sah;

Bahwa majelis hakim telah menasehati Penggugat agar berpikir untuk tidak bercerai dengan Tergugat, tetapi Penggugat tetap pada dalil-dalil gugatannya untuk bercerai dengan Tergugat;

Bahwa perkara ini tidak dapat dimediasi karena Tergugat tidak pernah datang menghadap meskipun telah dipanggil secara resmi dan patut, selanjutnya dimulai pemeriksaan dengan membacakan surat gugatan Penggugat yang maksud dan isinya tetap dipertahankan oleh Penggugat;

Bahwa untuk menguatkan dalil-dalil gugatan Penggugat telah mengajukan alat-alat bukti berupa:

## A. Surat:

1. Fotokopi Kartu Tanda Penduduk atas Nama PENGGUGAT Nomor 3278055710980002 Tanggal 28 April 2018 yang dikeluarkan oleh Kantor Pemerintah Kota Tasikmalaya, bukti surat tersebut telah diberi meterai cukup, dinazegelen pos dan telah dicocokkan dengan aslinya yang ternyata sesuai, lalu oleh Ketua Majelis diberi tanda P1;
2. Fotokopi Kartu Keluarga atas Nama Penggugat dan Tergugat Nomor 327802103170004 Tanggal 03 Juli 2019 yang dikeluarkan oleh Kantor Pemerintah Kota Tasikmalaya, bukti surat tersebut telah diberi meterai cukup, dinazegelen pos dan telah dicocokkan dengan aslinya yang ternyata sesuai, lalu oleh Ketua Majelis diberi tanda P2;
3. Fotokopi Salinan Putusan Itsbat Nikah Nomor 004/Pdt.P/2017/PA.Tmk Tanggal 08 Februari 2017, yang dikeluarkan oleh Pengadilan Agama Kota Tasikmalaya, bukti surat tersebut telah diberi meterai cukup, telah dinazegelen pos dan telah dicocokkan dengan aslinya yang ternyata sesuai, lalu oleh Ketua Majelis diberi tanda P3;

## B. Saksi:

Halaman 3 dari 11 halaman, Putusan Nomor 2335/Pdt.G/2020/PA.Tmk

### Disclaimer

Kepaniteraan Mahkamah Agung Republik Indonesia berusaha untuk selalu mencantumkan informasi paling kini dan akurat sebagai bentuk komitmen Mahkamah Agung untuk pelayanan publik, transparansi dan akuntabilitas pelaksanaan fungsi peradilan. Namun dalam hal-hal tertentu masih dimungkinkan terjadi permasalahan teknis terkait dengan akurasi dan keterkinian informasi yang kami sajikan, hal mana akan terus kami perbaiki dari waktu ke waktu. Dalam hal Anda menemukan inakurasi informasi yang termuat pada situs ini atau informasi yang seharusnya ada, namun belum tersedia, maka harap segera hubungi Kepaniteraan Mahkamah Agung RI melalui : Email : [kepaniteraan@mahkamahagung.go.id](mailto:kepaniteraan@mahkamahagung.go.id) Telp : 021-384 3348 (ext.318)



# Direktori Putusan Mahkamah Agung Republik Indonesia

putusan.mahkamahagung.go.id

1. XXXXX, umur 57 tahun, agama Islam, pekerjaan Buruh, bertempat tinggal di Kota Tasikmalaya, di bawah sumpahnya memberikan keterangan sebagai berikut:
  - Bahwa, saksi kenal Penggugat dan Tergugat dan memiliki hubungan dengan Penggugat sebagai Ayah Kandung Penggugat;
  - Bahwa, saksi mengetahui Penggugat dan Tergugat menikah pada tanggal 15 April 2014 di KUA Kawalu Kota Tasikmalaya;
  - Bahwa setelah menikah Penggugat dan Tergugat tinggal bersama di rumah orang tua Penggugat;
  - Bahwa, saksi mengetahui antara Penggugat dan Tergugat telah dikaruniai seorang anak;
  - Bahwa, saksi mengetahui keadaan rumah tangga Penggugat dan Tergugat pada awalnya rukun dan harmonis, akan tetapi kurang lebih sejak Awal Tahun 2017 sudah tidak rukun lagi sering terjadi pertengkaran;
  - Bahwa, saksi sering melihat dan mendengar Penggugat dan Tergugat cekcok;
  - Bahwa, saksi mengetahui yang menjadi penyebab ketidak harmonisan rumah tangga Penggugat dan Tergugat disebabkan karena Tergugat kurang memberikan nafkah kepada Penggugat sehingga untuk memenuhi kebutuhan sehari-hari, Penggugat harus bekerja sendiri, bahkan dibantu oleh keluarga Penggugat;
  - Bahwa, saksi mengetahui antara Penggugat dan Tergugat sudah pisah rumah sejak 2 tahun sampai dengan sekarang dan sudah tidak bersatu lagi;
  - Bahwa, baik saksi maupun pihak keluarga sudah berusaha merukunkan Penggugat dan Tergugat akan tetapi tidak berhasil;
  - Bahwa sejak berpisah tersebut sampai dengan sekarang antara Penggugat dan Tergugat sudah tidak lagi menjalankan kewajiban sebagaimana layaknya suami istri;

Halaman 4 dari 11 halaman, Putusan Nomor 2335/Pdt.G/2020/PA.Tmk



- Bahwa, saksi melihat rumah tangga Penggugat dan Tergugat sudah tidak mungkin lagi dipertahankan, sulit dipertahankan dan tidak ada harapan dapat bersatu lagi sehingga lebih baik bercerai;
- 2. XXXXX, umur 42 tahun, agama Islam, pekerjaan Wiraswasta, bertempat tinggal di Kota Tasikmalaya, di bawah sumpahnya memberikan keterangan sebagai berikut:
  - Bahwa, saksi kenal dengan Penggugat dan Tergugat dan memiliki hubungan dengan Penggugat sebagai Tetangga sekaligus Ketua RW tempat tinggal Penggugat;
  - Bahwa, saksi mengetahui Penggugat dan Tergugat adalah suami isteri yang sah yang menikah pada tanggal 15 April 2014 di KUA Kawalu Kota Tasikmalaya;
  - Bahwa setelah menikah Penggugat dan Tergugat tinggal bersama di rumah orang tua Penggugat
  - Bahwa, saksi mengetahui dari perkawinan Penggugat dan Tergugat telah dikaruniai seorang anak;
  - Bahwa, saksi mengetahui rumah tangga Penggugat dan Tergugat sudah tidak lagi harmonis, sering terjadi perselisihan dan pertengkaran sejak Tahun 2017 yang mengakibatkan antara Penggugat dan Tergugat sudah pisah rumah sejak 2 tahun sampai dengan sekarang dan selama berpisah antara Penggugat dan Tergugat tidak pernah bersatu lagi;
  - Bahwa, saksi sering melihat dan mendengar Penggugat dan Tergugat bertengkar;
  - Bahwa, saksi mengetahui perselisihan dan pertengkaran Penggugat dan Tergugat disebabkan karena Tergugat kurang memberikan nafkah kepada Penggugat sehingga untuk memenuhi kebutuhan sehari-hari, Penggugat harus bekerja sendiri;
  - Bahwa, pihak keluarga sudah ada upaya mendamaikan dan merukunkan Penggugat dan Tergugat akan tetapi tidak berhasil;



# Direktori Putusan Mahkamah Agung Republik Indonesia

putusan.mahkamahagung.go.id

- Bahwa sejak berpisah tersebut sampai dengan sekarang antara Penggugat dan Tergugat sudah tidak lagi menjalankan kewajiban sebagaimana layaknya suami istri;
- Bahwa, saksi sudah tidak sanggup lagi merukunkan Penggugat dan Tergugat karena sudah sulit dirukunkan dan sudah tidak ada harapan dapat bersatu lagi dan melihat keadaan rumah tangganya lebih baik bercerai;

Bahwa Penggugat telah menyampaikan kesimpulan yang pada pokoknya tetap pada gugatan dan mohon putusan yang mengabulkan tuntutan Penggugat;

Bahwa, untuk mempersingkat uraian putusan ini maka semua hal yang termuat dalam berita acara sidang ini merupakan bagian yang tidak terpisahkan dari putusan ini;

## **PERTIMBANGAN HUKUM**

Menimbang, bahwa maksud dan tujuan gugatan Penggugat adalah sebagaimana terurai di atas;

Menimbang, bahwa ternyata Tergugat, meskipun dipanggil secara resmi dan patut, tidak datang menghadap di muka sidang dan pula tidak ternyata bahwa tidak datangnya itu disebabkan suatu halangan yang sah;

Menimbang, bahwa Tergugat yang dipanggil secara resmi dan patut sesuai ketentuan Pasal 26 ayat (1) Peraturan Pemerintah Nomor 9 Tahun 1975, akan tetapi tidak datang menghadap harus dinyatakan tidak hadir dan gugatan tersebut harus diperiksa secara verstek;

Menimbang, bahwa oleh karena itu, maka putusan atas perkara ini dapat dijatuhkan tanpa hadirnya Tergugat (verstek);

Menimbang, bahwa sesuai dengan Pasal 39 Undang-undang Nomor 1 Tahun 1974, jo. Pasal 65 Undang-undang Nomor 7 Tahun 1989, sebagaimana telah diubah dengan Undang-undang Nomor 3 Tahun 2006 dan terakhir diubah dengan Undang-undang Nomor 50 Tahun 2009, jo. Pasal 115 Kompilasi Hukum Islam, Majelis Hakim pada setiap kali persidangan telah berusaha semaksimal mungkin menasehati Penggugat untuk bersabar agar bisa membina rumah

Halaman 6 dari 11 halaman, Putusan Nomor 2335/Pdt.G/2020/PA.Tmk





# Direktori Putusan Mahkamah Agung Republik Indonesia

putusan.mahkamahagung.go.id

tangga dengan rukun dan harmonis akan tetapi tidak berhasil, oleh karena itu perkara ini harus segera diputuskan;

Menimbang, bahwa oleh karena Tergugat tidak pernah datang menghadap meskipun telah dipanggil secara resmi dan patut maka sesuai Pasal 4 angka (2) huruf b Peraturan Mahkamah Agung Republik Indonesia Nomor 1 Tahun 2016 tentang Prosedur Mediasi di Pengadilan, perkara ini termasuk sengketa yang dikecualikan dari kewajiban mediasi;

Menimbang, bahwa berdasarkan ketentuan Pasal 125 ayat (1) HIR. yaitu putusan yang dijatuhkan tanpa hadirnya Tergugat dapat dikabulkan sepanjang berdasarkan hukum dan beralasan, oleh karena itu majelis membebani Penggugat untuk membuktikan dalil-dalil gugatannya;

Menimbang, bahwa untuk membuktikan dalil-dalil gugatannya, Penggugat telah mengajukan alat bukti surat P.1, P.2 dan P.3 serta dua orang saksi;

Menimbang, bahwa bukti P.1, P.2 dan P.3 merupakan akta otentik, telah bermeterai cukup, *bernazegelen* dan cocok dengan aslinya, isi bukti tersebut menjelaskan mengenai agama dan tempat tinggal Penggugat, sehingga sejalan dengan ketentuan Pasal 165 HIR bukti tersebut telah memenuhi syarat formal dan materiil, serta mempunyai kekuatan pembuktian yang sempurna dan mengikat (*volledig en bindende bewijskracht*);

Menimbang, bahwa berdasarkan bukti P.1 dan P.2 telah ternyata terbukti bahwa Penggugat bertempat tinggal di wilayah hukum Pengadilan Agama Kota Tasikmalaya, maka berdasarkan ketentuan Pasal 49 ayat (1) huruf a dan Pasal 73 ayat (1) Undang-undang Nomor 7 Tahun 1989 Tentang Peradilan Agama sebagaimana telah diubah dengan Undang-undang Nomor 3 Tahun 2006 dan perubahan kedua dengan Undang-undang Nomor 50 Tahun 2009, Pengadilan Agama Kota Tasikmalaya berwenang untuk memeriksa, memutus, dan menyelesaikan perkara ini;

Menimbang, bahwa berdasarkan bukti P.2 dan P.3, maka harus dinyatakan telah terbukti menurut hukum bahwa Penggugat dan Tergugat telah terikat dalam perkawinan yang sah secara Agama Islam sejak tanggal 15 April 2014.

Halaman 7 dari 11 halaman, Putusan Nomor 2335/Pdt.G/2020/PA.Tmk



## Direktori Putusan Mahkamah Agung Republik Indonesia

putusan.mahkamahagung.go.id

Menimbang, bahwa oleh karena Penggugat dan Tergugat masih terikat sebagai suami istri yang sah, maka Penggugat sebagai *persona standi in judicio* memiliki *legal standing* sehingga Penggugat dapat dinyatakan sebagai pihak yang mempunyai hak dan berkepentingan dalam perkara ini;

Menimbang, bahwa sesuai dengan Pasal 22 ayat (2) Peraturan Pemerintah Nomor 9 Tahun 1975, Majelis Hakim perlu mendapatkan keterangan pihak keluarga dan atau orang-orang yang dekat dengan suami isteri itu tentang adanya perselisihan dan pertengkaran antara Penggugat dan Tergugat;

Menimbang, bahwa 2 saksi Penggugat, adalah keluarga atau orang dekat Penggugat dan atau Tergugat sesuai dengan Pasal 22 ayat (2) Peraturan Pemerintah Nomor 9 Tahun 1975 jo. Pasal 134 Kompilasi Hukum Islam dan sudah dewasa serta sudah disumpah, sehingga memenuhi syarat formal sebagaimana diatur dalam Pasal 145 HIR;

Menimbang, bahwa keterangan 2 saksi Penggugat mengenai hubungan Penggugat dan Tergugat serta mengenai keadaan rumah tangga Penggugat dan Tergugat, adalah fakta yang pernah dilihat dan didengar langsung dan relevan dengan dalil yang harus dibuktikan oleh Penggugat, oleh karena itu keterangan saksi tersebut telah memenuhi syarat materiil sebagaimana telah diatur dalam Pasal 171 HIR sehingga keterangan saksi tersebut memiliki kekuatan pembuktian dan dapat diterima sebagai alat bukti;

Menimbang, bahwa keterangan 2 saksi Penggugat bersesuaian dan cocok antara satu dengan yang lain oleh karena itu keterangan dua orang saksi tersebut memenuhi Pasal 171 dan Pasal 172 HIR;

Menimbang, bahwa berdasarkan 2 saksi Penggugat, terbukti fakta kejadian sebagai berikut:

1. Bahwa sejak Tahun 2017 antara Penggugat dan Tergugat sering terjadi perselisihan dan pertengkaran yang disebabkan Tergugat kurang memberikan nafkah kepada Penggugat sehingga untuk memenuhi kebutuhan sehari-hari, Penggugat harus bekerja sendiri;
2. Bahwa akibat perselisihan dan pertengkaran tersebut antara Penggugat dan Tergugat sudah pisah rumah sejak 2 tahun yang lalu hingga

Halaman 8 dari 11 halaman, Putusan Nomor 2335/Pdt.G/2020/PA.Tmk

### Disclaimer

Kepaniteraan Mahkamah Agung Republik Indonesia berusaha untuk selalu mencantumkan informasi paling kini dan akurat sebagai bentuk komitmen Mahkamah Agung untuk pelayanan publik, transparansi dan akuntabilitas pelaksanaan fungsi peradilan. Namun dalam hal-hal tertentu masih dimungkinkan terjadi permasalahan teknis terkait dengan akurasi dan keterkinian informasi yang kami sajikan, hal mana akan terus kami perbaiki dari waktu ke waktu. Dalam hal Anda menemukan inakurasi informasi yang termuat pada situs ini atau informasi yang seharusnya ada, namun belum tersedia, maka harap segera hubungi Kepaniteraan Mahkamah Agung RI melalui : Email : [kepaniteraan@mahkamahagung.go.id](mailto:kepaniteraan@mahkamahagung.go.id) Telp : 021-384 3348 (ext.318)





## Direktori Putusan Mahkamah Agung Republik Indonesia

putusan.mahkamahagung.go.id

sekarang dan selama itu pula keduanya tidak pernah berkumpul lagi dan tidak melaksanakan hak dan kewajibannya masing-masing sebagaimana layaknya suami isteri;

3. Bahwa, baik majelis hakim dalam persidangan, maupun pihak keluarga Penggugat dan Tergugat sudah berusaha menasehati Penggugat dan Tergugat dan sudah ada upaya musyawarah dua keluarga untuk merukunkan Penggugat dan Tergugat, akan tetapi tidak berhasil, karena Penggugat bersikukuh ingin bercerai dengan Tergugat;

Menimbang, bahwa berdasarkan fakta-fakta kejadian tersebut di atas dapat disimpulkan fakta hukum bahwa antara Penggugat dan Tergugat terus menerus terjadi perselisihan dan pertengkaran dan sudah tidak ada harapan hidup rukun lagi dalam rumah tangga;

Menimbang, bahwa berdasarkan fakta hukum di atas, maka Majelis Hakim berkesimpulan bahwa rumah tangga Penggugat dan Tergugat benar-benar sudah tidak harmonis dan sudah pecah karena telah terjadi perselisihan dan pertengkaran terus menerus yang sudah tidak mungkin lagi untuk dirukunkan dalam satu rumah tangga sehingga mempertahankan rumah tangga yang demikian tidak sejalan dengan maksud dan tujuan perkawinan sebagaimana yang dikehendaki dalam Al-Qur'an Surat Ar-Rum: 21 dan Pasal 1 Undang-Undang Nomor 1 Tahun 1974;

Menimbang, bahwa fakta hukum tersebut telah memenuhi norma hukum Islam yang terkandung dalam Kitab Fikih Sunah Juz II halaman 290 yang diambil alih menjadi pertimbangan Majelis Hakim sebagai berikut;

أَنَّ لِلزَّوْجَةِ أَنْ تَطْلُبَ مِنَ الْقَاضِيِ التَّفْرِيقَ إِذَا ادَّعَتْ إِضْرَارَ الزَّوْجِ بِهَا إِضْرَارًا لَا يَسْتَطَاعُ مَعَهُ دَوَامُ الْعِشْرَةِ بَيْنَ أُمَّثَلِهِمَا

Artinya : *"bahwa istri boleh menuntut cerai kepada hakim apabila dia mengaku selalu mendapat perlakuan yang menyakitkan dari suaminya sehingga hal tersebut dapat menghalangi keberlasungan hubungan suami istri antara mereka berdua";*

Menimbang, bahwa fakta hukum tersebut telah juga memenuhi salah satu alasan perceraian sebagaimana diatur dalam ketentuan Pasal 39 ayat (2)

Halaman 9 dari 11 halaman, Putusan Nomor 2335/Pdt.G/2020/PA.Tmk

#### Disclaimer

Kepaniteraan Mahkamah Agung Republik Indonesia berusaha untuk selalu mencantumkan informasi paling kini dan akurat sebagai bentuk komitmen Mahkamah Agung untuk pelayanan publik, transparansi dan akuntabilitas pelaksanaan fungsi peradilan. Namun dalam hal-hal tertentu masih dimungkinkan terjadi permasalahan teknis terkait dengan akurasi dan keterkinian informasi yang kami sajikan, hal mana akan terus kami perbaiki dari waktu ke waktu. Dalam hal Anda menemukan inakurasi informasi yang termuat pada situs ini atau informasi yang seharusnya ada, namun belum tersedia, maka harap segera hubungi Kepaniteraan Mahkamah Agung RI melalui : Email : [kepaniteraan@mahkamahagung.go.id](mailto:kepaniteraan@mahkamahagung.go.id) Telp : 021-384 3348 (ext.318)

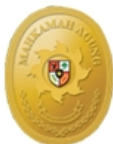

# Direktori Putusan Mahkamah Agung Republik Indonesia

putusan.mahkamahagung.go.id

Undang-Undang Nomor 1 Tahun 1974 jo. Pasal 19 huruf f Peraturan Pemerintah Nomor 9 Tahun 1975 jo. Pasal 116 huruf f Kompilasi Hukum Islam;

Menimbang, bahwa berdasarkan pertimbangan-pertimbangan tersebut di atas dan Penggugat belum pernah dijatuhi talak, maka petitum gugatan Penggugat agar Pengadilan menjatuhkan talak satu bain sughra Tergugat terhadap Penggugat tersebut telah beralasan dan tidak melawan hukum serta memenuhi Pasal 119 ayat 2 huruf (c) Kompilasi Hukum Islam, oleh karena itu patut dikabulkan;

Menimbang, bahwa karena perkara *a quo* masuk bidang perkawinan, maka berdasarkan Pasal 89 ayat (1) Undang-undang Nomor 7 Tahun 1989 Tentang Peradilan Agama sebagaimana telah diubah dengan Undang-undang Nomor 3 Tahun 2006 dan perubahan kedua dengan Undang-undang Nomor 50 Tahun 2009, biaya perkara harus dibebankan kepada Penggugat;

Mengingat semua pasal dalam peraturan perundang-undangan dan hukum Islam yang berkaitan dengan perkara ini;

## MENGADILI

1. Menyatakan Tergugat yang telah dipanggil secara resmi dan patut untuk menghadap di persidangan, tidak hadir;
2. Mengabulkan gugatan Penggugat secara verstek;
3. Menjatuhkan talak satu ba'in sughro Tergugat (TERGUGAT) terhadap Penggugat (PENGGUGAT);
4. Membebankan biaya perkara kepada Penggugat sejumlah Rp 326000,00 (tiga ratus dua puluh enam ribu rupiah);

Demikian diputuskan dalam rapat permusyawaratan Majelis Hakim yang dilangsungkan pada hari Rabu tanggal 23 Desember 2020 *Masehi*, bertepatan dengan tanggal 8 Jumadil Awwal 1442 *Hijriyah*, oleh kami Marwan Ibrahim Piinga, S.Ag. sebagai Ketua Majelis, Ahmad Mudlofar, S.H.I. dan Ahmad Mufid Bisri, S.H.I. masing-masing sebagai Hakim Anggota, putusan tersebut diucapkan dalam sidang terbuka untuk umum pada hari itu juga, oleh Ketua Majelis tersebut dengan didampingi oleh Hakim Anggota yang sama dan

Halaman 10 dari 11 halaman, Putusan Nomor 2335/Pdt.G/2020/PA.Tmk



# Direktori Putusan Mahkamah Agung Republik Indonesia

putusan.mahkamahagung.go.id

dibantu oleh Drs. M. JAM sebagai Panitera Pengganti serta dihadiri oleh  
Penggugat tanpa hadirnya Tergugat;

Hakim Anggota

Ketua Majelis

ttd

ttd

Ahmad Mudlofar, S.H.I.  
Hakim Anggota

Marwan Ibrahim Piinga, S.Ag.

ttd

Ahmad Mufid Bisri, S.H.I.

Panitera Pengganti

ttd

Drs. M. JAM

## Perincian Biaya:

1. Pendaftaran : Rp. 30.000,00
2. Proses : Rp. 50.000,00
3. Panggilan : Rp. 210.000,00
4. PNBK Panggilan : Rp. 20.000,00
5. Redaksi : Rp. 10.000,00
6. Meterai : Rp. 6.000,00

Jumlah Rp. 326.000,00

(tiga ratus dua puluh enam ribu rupiah)

Pemberitahuan isi  
Putusan Tanggal : .....

Untuk salinan putusan yang sama bunyinya oleh :  
Panitera Pengadilan Agama Kota Tasikmalaya,

Putusan Berkekuatan  
Hukum Tetap Tanggal : .....

**Didin Jamaludin, S.H., M.H.**

Halaman 11 dari 11 halaman, Putusan Nomor 2335/Pdt.G/2020/PA.Tmk
