# Supplementary material for: Classification of divorce causes during the COVID-19 pandemic using convolutional neural networks
Source: PeerJ journal article supplement (doi:10.7717/peerj-cs.998), 2022-06-30
Supplement: KDRT_Dataset.zip [file KDRT_Dataset.zip]

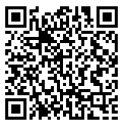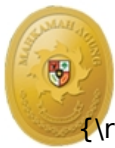

# Direktori Putusan Mahkamah Agung Republik Indonesia

putusan.mahkamahagung.go.id

```
{\rtf1\ansi\ansicpg1256\uc1\deff1{\fonttbl
{\f0\fswiss\fcharset178\fprq2 Arial;}
{\f1\froman\fcharset0\fprq2 Times New Roman;}
{\f2\fswiss\fcharset0\fprq2 Calibri;}
{\f3\fswiss\fcharset0\fprq2 Segoe UI;}
{\f4\fscript\fcharset0\fprq2 Lucida Calligraphy;}
{\f5\fswiss\fcharset0\fprq2 Arial;}
{\f6\froman\fcharset2\fprq2 Symbol;}}
{\colortbl;\red0\green0\blue0;}
{\stylesheet{\s0\itap0\widctlpar\f1\fs24 Normal;}{\*\cs10\additive Default
Paragraph Font;}{\s16\itap0\nowidctlpar\f0\fs24 [Normal];}
{\s17\itap0\widctlpar\tqc\tx4153\tqr\tx8306\f1\fs24\sbasedon0 footer;}
{\s18\itap0\widctlpar\qc\f2\fs24\b\sbasedon0 Title;}
{\s19\itap0\widctlpar\li360\sa120\sl480\slmult1\f2\fs24\sbasedon0 Body Text
Indent 2;}
{\s20\itap0\widctlpar\qc\li720\sa200\sl276\slmult1\f2\fs22\sbasedon0 List
Paragraph;}{\s21\itap0\widctlpar\tqc\tx4153\tqr\tx8306\f1\fs24\sbasedon0
header;}{\s22\itap0\widctlpar\f3\fs18\sbasedon0 Balloon Text;}
{\s23\itap0\widctlpar\f2\fs22\sbasedon16 No Spacing;}
{\*\cs24\additive\sbasedon10 Footer Char;}{\*\cs25\additive\sbasedon10
Header Char;}{\*\cs26\f3\fs18\additive\sbasedon10 Balloon Text Char;}
{\*\cs27\fs24\additive\sbasedon10 Body Text Indent 2 Char;}
{\*\cs28\fs24\b\additive\sbasedon10 Title Char;}}
{\listtable{\list\listtemplateid1{\listlevel\levelnfc0\leveljc0\levelfollow0\leve
lstartat1\levelspace0\levelindent0{\leveltext\'02\'00.;}
{\levelnumbers\'01;}f5\fs24\b0\i0\strike0\ul0\cf0\cb0\fi-360\li360}
{\listlevel\levelnfc0\leveljc0\levelfollow0\levelstartat1\levelspace0\levelinden
t0{\leveltext\'02\'01.;}
{\levelnumbers\'01;}f5\fs24\b0\i0\strike0\ul0\cf0\cb0\fi-360\li720}
{\listlevel\levelnfc0\leveljc0\levelfollow0\levelstartat1\levelspace0\levelinden
t0{\leveltext\'02\'02.;}
{\levelnumbers\'01;}f5\fs24\b0\i0\strike0\ul0\cf0\cb0\fi-360\li1080}
{\listlevel\levelnfc0\leveljc0\levelfollow0\levelstartat1\levelspace0\levelinden
t0{\leveltext\'02\'03.;}
{\levelnumbers\'01;}f5\fs24\b0\i0\strike0\ul0\cf0\cb0\fi-284\li284}
{\listlevel\levelnfc0\leveljc0\levelfollow0\levelstartat1\levelspace0\levelinden
t0{\leveltext\'02\'04.;}
{\levelnumbers\'01;}f5\fs24\b0\i0\strike0\ul0\cf0\cb0\fi-284\li644}
{\listlevel\levelnfc0\leveljc0\levelfollow0\levelstartat1\levelspace0\levelinden
t0{\leveltext\'02\'05.;}
{\levelnumbers\'01;}f5\fs24\b0\i0\strike0\ul0\cf0\cb0\fi-284\li1004}
{\listlevel\levelnfc0\leveljc0\levelfollow0\levelstartat1\levelspace0\levelinden
t0{\leveltext\'02\'06.;}
{\levelnumbers\'01;}f5\fs24\b0\i0\strike0\ul0\cf0\cb0\fi-284\li1364}
{\listlevel\levelnfc0\leveljc0\levelfollow0\levelstartat1\levelspace0\levelinden
t0{\leveltext\'02\'07.;}}
```

#### Disclaimer

Kepaniteraan Mahkamah Agung Republik Indonesia berusaha untuk selalu mencantumkan informasi paling kini dan akurat sebagai bentuk komitmen Mahkamah Agung untuk pelayanan publik, transparansi dan akuntabilitas pelaksanaan fungsi peradilan. Namun dalam hal-hal tertentu masih dimungkinkan terjadi permasalahan teknis terkait dengan akurasi dan keterkinian informasi yang kami sajikan, hal mana akan terus kami perbaiki dari waktu ke waktu. Dalam hal Anda menemukan inakurasi informasi yang termuat pada situs ini atau informasi yang seharusnya ada, namun belum tersedia, maka harap segera hubungi Kepaniteraan Mahkamah Agung RI melalui : Email : kepaniteraan@mahkamahagung.go.id Telp : 021-384 3348 (ext.318)

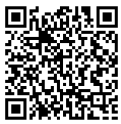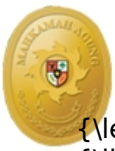

# Direktori Putusan Mahkamah Agung Republik Indonesia

putusan.mahkamahagung.go.id

{\levelnumbers\01;}\f5\fs24\b0\i0\strike0\ul0\cf0\cb0\fi-284\li1724}  
{\listlevel\levelnfc0\leveljc0\levelfollow0\levelstartat1\levelspace0\levelinden  
t0{\leveltext\02\08.;}  
{\levelnumbers\01;}\f5\fs24\b0\i0\strike0\ul0\cf0\cb0\fi-284\li2084}  
{\listname ;}\listid1}  
{\list\listtemplateid2{\listlevel\levelnfc23\leveljc0\levelfollow0\levelstartat1\l  
evelspace0\levelindent0{\leveltext\01\u-4051 ?;}  
{\levelnumbers;}\f6\fs24\fbias0\b0\i0\strike0\ul0\cf0\cb0\fi-284\li284}  
{\listlevel\levelnfc23\leveljc0\levelfollow0\levelstartat1\levelspace0\levelinde  
nt0{\leveltext\01\u-4051 ?;}  
{\levelnumbers;}\f6\fs24\fbias0\b0\i0\strike0\ul0\cf0\cb0\fi-284\li644}  
{\listlevel\levelnfc23\leveljc0\levelfollow0\levelstartat1\levelspace0\levelinde  
nt0{\leveltext\01\u-4051 ?;}  
{\levelnumbers;}\f6\fs24\fbias0\b0\i0\strike0\ul0\cf0\cb0\fi-284\li1004}  
{\listlevel\levelnfc23\leveljc0\levelfollow0\levelstartat1\levelspace0\levelinde  
nt0{\leveltext\01\u-4051 ?;}  
{\levelnumbers;}\f6\fs24\fbias0\b0\i0\strike0\ul0\cf0\cb0\fi-284\li1364}  
{\listlevel\levelnfc23\leveljc0\levelfollow0\levelstartat1\levelspace0\levelinde  
nt0{\leveltext\01\u-4051 ?;}  
{\levelnumbers;}\f6\fs24\fbias0\b0\i0\strike0\ul0\cf0\cb0\fi-284\li1724}  
{\listlevel\levelnfc23\leveljc0\levelfollow0\levelstartat1\levelspace0\levelinde  
nt0{\leveltext\01\u-4051 ?;}  
{\levelnumbers;}\f6\fs24\fbias0\b0\i0\strike0\ul0\cf0\cb0\fi-284\li2084}  
{\listlevel\levelnfc23\leveljc0\levelfollow0\levelstartat1\levelspace0\levelinde  
nt0{\leveltext\01\u-4051 ?;}  
{\levelnumbers;}\f6\fs24\fbias0\b0\i0\strike0\ul0\cf0\cb0\fi-284\li2444}  
{\listlevel\levelnfc23\leveljc0\levelfollow0\levelstartat1\levelspace0\levelinde  
nt0{\leveltext\01\u-4051 ?;}  
{\levelnumbers;}\f6\fs24\fbias0\b0\i0\strike0\ul0\cf0\cb0\fi-284\li2804}  
{\listlevel\levelnfc23\leveljc0\levelfollow0\levelstartat1\levelspace0\levelinde  
nt0{\leveltext\01\u-4051 ?;}  
{\levelnumbers;}\f6\fs24\fbias0\b0\i0\strike0\ul0\cf0\cb0\fi-284\li3164}  
{\listname ;}\listid2}  
{\\*\listoverridetable{\listoverride\listid1\listoverridecount0\ls1}  
{\listoverride\listid2\listoverridecount0\ls2}}  
{\\*\generator TX\_RTF32 19.0.542.500;}{\info{\\*\hlinkbase D:\5cMASTER  
PUTUSAN OK\5c}}  
\  
paperw11906\paperh16838\margl1440\margt1440\marginr1440\marginb1440\d  
eftab1134\widowctrl\lytexcttp\formshade\sectd\pgbrdrhead\pgbrdrfoot  
\  
headery720\footery720\pgwsxn11907\pghsxn16840\marginlsxn2268\marginrsxn  
1701\marginrsxn1134\marginbsxn1134\pgbrdropt0\pgbrdrhead\pgbrdrfoot  
{\footer\pard\itap0\widctlpar\qr\plain\f4\fs24\tab\plain\f5\fs12 Hal.  
\plain\f5\fs12{\txfielddef{\\*\txfieldstart\txfieldtype3\txfieldflags0}  
{\\*\txfieldddatadef\txfieldddatatype3\txfieldddata 00030001}}{\\*\txfieldtext

## Disclaimer

Kepaniteraan Mahkamah Agung Republik Indonesia berusaha untuk selalu mencantumkan informasi paling kini dan akurat sebagai bentuk komitmen Mahkamah Agung untuk pelayanan publik, transparansi dan akuntabilitas pelaksanaan fungsi peradilan. Namun dalam hal-hal tertentu masih dimungkinkan terjadi permasalahan teknis terkait dengan akurasi dan keterkinian informasi yang kami sajikan, hal mana akan terus kami perbaiki dari waktu ke waktu. Dalam hal Anda menemukan inakurasi informasi yang termuat pada situs ini atau informasi yang seharusnya ada, namun belum tersedia, maka harap segera hubungi Kepaniteraan Mahkamah Agung RI melalui :  
Email : kepaniteraan@mahkamahagung.go.id Telp : 021-384 3348 (ext.318)

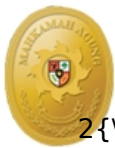

# Direktori Putusan Mahkamah Agung Republik Indonesia

putusan.mahkamahagung.go.id

2{{\\*\txfieldend}}{\field{\\*\fldinst{ PAGE \\*\ Arabic }}  
{\fldrslt{1}}}}\plain\f5\fs12 dari  
\plain\f5\fs12{\txfielddef{\\*\txfieldstart\txfieldtype9\txfieldflags0}  
{\\*\txfieldddatadef\txfieldddatatype9\txfieldddata 00030000}{\\*\txfieldtext  
6{\\*\txfieldend}}{\field{\\*\fldinst{ NUMPAGES \\*\ Arabic }}  
{\fldrslt{1}}}}\plain\f5\fs12 hal.  
\par\pard\s17\itap0\widctlpar\qr\ri357\tqr\tx8306\tx10208\tx12760\tx15312\t  
x17864\tx20416\tx22968\tx25520\tx28072\tx30624\plain\f4\fs24  
\plain\f5\fs22\par\pard\s17\itap0\widctlpar\tqc\tx4153\tqr\tx8306\tx10208\tx  
12760\tx15312\tx17864\tx20416\tx22968\tx25520\tx28072\tx30624\plain\f1  
\fs24\par\pard\s17\itap0\widctlpar\tx3325\tqc\tx4153\tqr\tx8306\tqr\tx8505\p  
ar}\pard\s18\itap0\widctlpar\qc\plain\f5\fs32\b P E N E T A P A  
N\par\pard\itap0\widctlpar\qc\plain\f5\fs24 Nomor  
6592/Pdt.G/2020/PA.Sbr\par{\pict{\\*\picprop{\sp{\sn shapeType}{\sv 75}}  
{\sp{\sn fFlipH}{\sv 0}}{\sp{\sn fFlipV}{\sv 0}}{\sp{\sn wzName}{\sv  
Picture 1}}{\sp{\sn fLayoutInCell}{\sv  
1}}}}\wmetafile8\picw23813\pich4445\picwgoal13500\pichgoal2520\picscale  
x25\picscaley25\blipupi96  
0100090000036a26000000000511000000001610000026060f002220574d4  
64301000000000000100d1fc0000000002000000  
00200000080a0000082a0000010000006c000000000000000000000003f020  
000770000000000000000000000000634f00008910  
000020454d4600000100082a00000c00000001000000000000000000000000  
00000005605000000030000e20100000f010000  
00000000000000000000000000665a070055220400460000002c00000020000  
000454d462b014001001c000000100000000210  
c0db010000006000000060000000460000006406000058060000454d462b2  
24004000c0000000000000001e4009000c000000  
00000000244001000c0000000000000030400200100000000400000000008  
03f214007000c00000000000000008400005b005  
0000a40500000210c0db010000000000000000000000000000000000000000  
100000089504e470d0a1a0a0000000d49484452  
0000024000000078010300000020e2df9c000000017352474200aece1ce900  
000006504c5445000000fffffa5d99fdd0000  
052f4944415468deedd83f6fe336140070aa1a34aa638702ec472850a0e870a  
85af4a3f40374bda1382948812c87f39a0245  
fd4d6a051e7c4be1f53a85410aa45b64780883d07c7def91fa2f5b17c543815a  
401c27667e7a7c241fa90838d2254ed0093a  
41ff4548a747828a63412a7931b4e2d7fce550442fbb772fee9a0d39d797d3a0  
c7faad71909836fcaa01fdc883164c8372ff  
7d07f08193fd77f83208bb9851b21fee9269d06ff4b206d860bb18dfde4d5c22  
4f9fd1eb0ce00aaca0582e26422eb5184a08  
f63b7e6ba6418a526b2598082c8fdc5428a7046b0945ec2654212742efa55ba  
64a6abfd02642d7f492a59041416387dff524  
881d1bd0b8a974cdcb6d7f5d3b00a5335e5d912b4308193909b20e72954c25  
f803f6cb4c804cca63750b055245c2ea620a54

## Disclaimer

Kepaniteraan Mahkamah Agung Republik Indonesia berusaha untuk selalu mencantumkan informasi paling kini dan akurat sebagai bentuk komitmen Mahkamah Agung untuk pelayanan publik, transparansi dan akuntabilitas pelaksanaan fungsi peradilan. Namun dalam hal-hal tertentu masih dimungkinkan terjadi permasalahan teknis terkait dengan akurasi dan keterkinian informasi yang kami sajikan, hal mana akan terus kami perbaiki dari waktu ke waktu. Dalam hal Anda menemukan inakurasi informasi yang termuat pada situs ini atau informasi yang seharusnya ada, namun belum tersedia, maka harap segera hubungi Kepaniteraan Mahkamah Agung RI melalui :  
Email : kepaniteraan@mahkamahagung.go.id Telp : 021-384 3348 (ext.318)

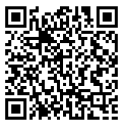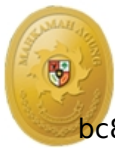

# Direktori Putusan Mahkamah Agung Republik Indonesia

[putusan.mahkamahagung.go.id](http://putusan.mahkamahagung.go.id)

bc89fc58c554aa199af7201b8c42b90d1d44cb55d3428127d9838c484620bc9  
587dec6b0aba0eeead7a3900e4b681ec39f9a  
6bff577de8311b835404170ec2517fefa02f13db85b6d584d807e19d660e2a9  
2dd0707893e54ef98fb205cf83e2205bb4b93  
32945ad9bbe1d8a82de09a21c3897050007d281c5f22d72b82f82b30e992d2  
de87eabeee8576b3152592bf10ba75bf95034b  
e9e3209a823a32c97e281981fe9aad08a19963520feda8803f17fad5419687d  
c41d60c417204ba8c6f115a5ba963e208327a  
0032f1089449822e40e21c47e8c641b30950728bf93907990714ff661f64a33  
128bdc5ec0430cf455a43fdbdd68623d00a3c  
94094c2741f7e6f5d0a67d3e36b3193a2728aaa074d56f76350add20b482f98  
2fa46d07a026468726c78ae2d201721c882a0  
9f87207508a2b98310710b2b108a3543c900541c820a1a8a8d5b5985c02451  
918b26404ad450ee2183901c80f46128a15b49  
37a17061205444e68d1c38fcf9aa3d0ce57464d40ec231bb26288fccb7f15daf  
b4dd9b43d09510af3ce44e8f3303f9ca2264  
9e0761df84831eec171e3a5fd924bed3adf5ff04d7eb2ed43e439912da9ad704  
adb114adac8cef8b16b485f9b20bb51ee9e6  
5a0408cd71e8f42b84d618915cd97806dbd66a5bd20aea40cd473a2b550961  
1f133a9118fb79642384ceda9b91cc4467f8f3  
46167524e2651712910d66b0c91a91ebd0443de85ddc1c7d010f9b124a1932  
e20783934209d96a875707fa3d6c663ae4733f  
42c5270c4984bed70cb5da09f14dd08166f544c8033ea505b048703e3394ec8  
cc84516fbae36024aee3b5054c55c889086d0  
415a66ae54983017984725aa90b4102aa852564142f818b16c70ba10fa23f12  
be986c73528181251d92ed2610e7dc835d0c2  
05bfc6331beeebeea181f75915e2b6f20be7f727807fa89d8d1f87a0f2e287a2  
1837ac0a5a728874a328cfab76ad07dc0aca  
6a8892a5e9046ba009f1961b73c8753b1fed2014d2e3a74a9a50b52ef0a1ab6  
ae903ca3bd0a7611933ef55fc245441d4297e  
478f01654849b993b62023cfadfb1c7fbf3dc38db8006f71877c6de6bf3265bb2  
1886e05e5845701a65931a4cb0e7117e889  
6141adbfae174ad6ee9a6a56113a37d0c6879388e328e8cf0297efde09f9a60  
d65ad924dfb39d60b9d50b30d1dbae90999e3  
365de869db8428e66d5db2efb9d65097ce78634b7d54db4ee8f5dc28219cc6f  
e176e6ad89422c05368e8ca6e95d376e8beba  
35205aee51e3431babb8ac27c033c64f25d3fb378b7b582da1cceff7f58ca779  
6bdcfa538d4fdac5bf515a050cd55abfd796  
85a0196ad7b1dde26f452b8b9a7f6c54b17d97e99e21bb9d5fba1a08063eee1  
27b63f689d4cf85f65dea58507624c8064782  
74782448c54782b2f44850044782e0049da01374824ed009fa3f42ff02c21e32  
85687fb84f0000000049454e44ae42608200  
0840010824000000180000000210c0db0100000003000000000000000000  
000000000001b40000040000000340000000100  
000002000000000000bf000000bf000010440000f04203000000000000b300  
0000b3ffff0f44000000b3000000b3ffffef42

## Disclaimer

Kepaniteraan Mahkamah Agung Republik Indonesia berusaha untuk selalu mencantumkan informasi paling kini dan akurat sebagai bentuk komitmen Mahkamah Agung untuk pelayanan publik, transparansi dan akuntabilitas pelaksanaan fungsi peradilan. Namun dalam hal-hal tertentu masih dimungkinkan terjadi permasalahan teknis terkait dengan akurasi dan keterkinian informasi yang kami sajikan, hal mana akan terus kami perbaiki dari waktu ke waktu. Dalam hal Anda menemukan inakurasi informasi yang termuat pada situs ini atau informasi yang seharusnya ada, namun belum tersedia, maka harap segera hubungi Kepaniteraan Mahkamah Agung RI melalui :  
Email : [kepaniteraan@mahkamahagung.go.id](mailto:kepaniteraan@mahkamahagung.go.id) Telp : 021-384 3348 (ext.318)

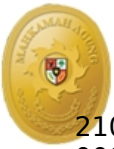

**putusan.mahkamahagung.go.id**

[illegible]



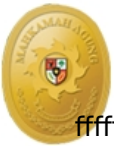

# Direktori Putusan Mahkamah Agung Republik Indonesia

putusan.mahkamahagung.go.id

ffffffffffffffffffffffffffffffffffffffffffffffffffffffffffffffffffffffffe00fff  
ffffffffffffffffffffffffffffffffffffffffffffffffffffffffffffffffffffffff  
ffffffffffffffffffffffffffffffff803fffffffffffffffffffffffffffffffffffff  
ffffffffffffffffffffffffffffffffffffffffffffffffffffffffffffffffffffffffe01fffffffff  
ffffffffffffffffffffffffffffffffffffffffffffffffffffffffffffffffffffffff  
ffffffffffffffffffffffff80fffffffffffffffffffffffffffffffffffffffffffff  
ffffffffffffffffffffffffffffffffffffffffffffffffffffffffffffffffe0fffffffffffff  
fffffffffffffffffffffffffffffffffffffffffffffffffffffffffffffefffffffffffff  
ffffffff807fff8fffffffffffffffffffffffffffffffffffffffffffffffffffffffff  
ffffffffffffc03ffffffffffffffffffffc3ffffffffc000ffcffffffffffffffffffffff  
ffffffffffffffffffffffffffffffffffffffffffffffffe007ffffffffffffffffffff8007fffff00  
003ffffffffffffffffffffffffffffffffffffffffffffffffffffc07ffffffffffffffffffff  
ffc01ffffffffffffffffffffe0003fffffe00000fffffffffffffffffffffefffffffffffff  
ffffffffffffe007ffffffffffffffffffff80ffff80ffffffffffffffffffff00001fffffc000007ffff  
ffe0  
0ffffffffffffffffffff00ffffffffffffffffffffffffffffc01ffffffffffffffffffffc00ffff07fffff  
fffffffffffffe0fe00fffffc000003fffff0001fffff87ffffffffffffc03ffffffffffffffffffff  
fffff  
fff807ffffffffffffffffffff803ffffc3fffffffffffffe3fffe7ffc07ffff807fc03ffffc0000ff  
ffff807f  
ffffffffffff80ffffffffffffffffffff03fffffffffffffe01ffff3fffffffffffff  
clefffff03ffff81fff81ffff000007fffff01fffff3fffe07ffffffffffffffffffffc3  
fffff  
ffffffffffff80ffffffffffffffffffffc083fffff81ffff83ffe1ffff1ff803fffffc07fffff0  
3fff  
fc3fffffffffffffbf3fffffffffffffe07fffffffffffffc001fffffc1  
ffff87ffff0fffff01fffff01fffff80ffffe3fffffffffffffe1fffffffffffff  
fffff03fffff00000000fffffe001fe7ffe0ffff8ffff8fffff81fffffc0fffffe01ffff  
bfffff0  
361ffffffffffff80ffffffffffffc1f83fe000000000007fffff381fe07fff0  
ffff8ffffc  
fffff0fffff0fffff807fffffc00000000007ffffffff807fffffffffffff  
f1003  
c000000000000000fffff83ff80fff8ffffcffffcfffff07fffffcfffff03fffff80000  
00000000003fff  
ffffffff807ffffffffffff800000000000000000003fffcffe03ffc7fffcffff  
fcfffff87  
ffffffffffff81ffff800000000000000001fffffffffc0fffffffffffff80000  
0000000000  
0000001fffff81ffc7fffcffffcfffff3fffff80ffffe0fff800000000000000  
0001fffff3  
fffffffffffff0000000000000000000000003fffffe0ffc0fffe7fffcfffff  
c3fffff007  
fffff07c0c00000000000000000001fffffffffffff0000007ffff  
ffff80000003fff  
ffffc803fffe7ffffcfffff3fffffe003fc3ff840000000006ffffe80000003ffe0

## Disclaimer

Kepaniteraan Mahkamah Agung Republik Indonesia berusaha untuk selalu mencantumkan informasi paling kini dan akurat sebagai bentuk komitmen Mahkamah Agung untuk pelayanan publik, transparansi dan akuntabilitas pelaksanaan fungsi peradilan. Namun dalam hal-hal tertentu masih dimungkinkan terjadi permasalahan teknis terkait dengan akurasi dan keterkinian informasi yang kami sajikan, hal mana akan terus kami perbaiki dari waktu ke waktu. Dalam hal Anda menemukan inakurasi informasi yang termuat pada situs ini atau informasi yang seharusnya ada, namun belum tersedia, maka harap segera hubungi Kepaniteraan Mahkamah Agung RI melalui : Email : kepaniteraan@mahkamahagung.go.id Telp : 021-384 3348 (ext.318)

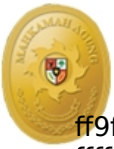

# Direktori Putusan Mahkamah Agung Republik Indonesia

putusan.mahkamahagung.go.id

ff9fffffffffffffff  
ffffffffffffffff000001ffffffffffffe00000ffffffff001ffbe3ffff87fffffffffe1ffffffffe001f0  
1fffe00000  
0007ffffffffffe000007f803c0ffffffffffffffffffffffffffff07001ffffffffffffffff00003f07  
ffffffff001ff  
bf3ffff81f80fffffe0ffffc03c000c01fffe0000003ffffffffffff80000e001807ffffffff  
ffffffffffffffff  
ffff8f00ffffffffffffffffc001c00ffff001ffbf3ffff007007ffffc03ffdfc00c000800fffe  
000003ffffffffffff  
ffffffc0000000003feffffffffffffffffffffffff9e03ffffffffffffffffc000003ffff001ff9  
ffffff00200  
7ffffc01fffc0041f8000fffe00003ffffffffffffffffc00000003801ffffffffffffffff  
ffffff8e0ffff  
ffffffffffffffffc00000fff7f1f8ff9ffffe000007ffffc00ffcfc0043fc000fffe0001ffffff  
ffffffffffffc000  
00000000ffffffffffffffffffffffffc01ffffffffffffffff807000fc3fff8ff9ffffe000003  
ffffc00ffc  
fe0007fe018ffff1807ffffffffffffffff803fc078000fffffffffffffffffffffe03ffffffff  
ffffff  
fffffe1fe00001fff8ff9ffffe000003ffffc00ffcfe1c07fe078ffff381ffffffffffffffff  
03ff1f8000fff  
ffffffffffffffffffff07ffffffffffffffff9ff80001fff8ff9ffff1f83c3ffffcf8ffcff1fc7f  
e0f8f  
fff387ffffffffffffffff3ff9f80007ffffffffffffffff8ffffffffffffffffc00  
00fff8ff1ffffff3fc783ffffcfcff0fc7fe1f0feff00ffffffffffffffff3ff9fc3fc7ffff  
ffffff  
ffffffffffffffffffffffffe00000fff8ff1ffffff7fe203fffff8ffcff83c7fe3f0fe7f8  
0fffff  
ffffffffffffffffbffdffcfc7ffffffffffffffffffffffffffffffffc100003cff8ff1fff  
ffffe003fffff8ffcffc0c7fe3e0fe7fc1fffffffffffffffffffffeffc7ffffffffffffff  
ffff  
ffffffffffffffffc0000ffff8ff1ffffff007ffdf8ff8ffc007fc3e0fe7fe1ffffffff  
ffffff  
ffffffffffffefc7ffffffffffffffffffffffffffffffffffffe0003ffff0ff1ffffffff807fff  
0fff8ff8fff007fc7e1fe7ffffffffffffffffffffffff87ffffffffffffffffffff  
ffffffffffffe000fffff1ff1ffffc0000007ff8ff8ffc07fc7c1fc7ffffffffffff  
ffffff  
fff8ffffffffffffffffffffffff003fffff1ff1ffffffff0000007ff8ff8fff  
07fc7c3fc7ffffffffffffffffffff0ffffffffffffffffffff  
fff80fffff1fe1fffffbffe000003ff0ff8fffcffc7c3fc7ffffffffffff0ff  
ffff  
ffffffffffffffffc1ffffff1fe3fffffbffc00003ff1ff0fffcffc7c7fc  
7ff  
ffffffffffffffffffffe0ffffffffffffffffffff  
e1fe3fffc7ff9bfc0007fff1ff1fffcffc787fc7ffffffffffffc1ffffffff  
ffff

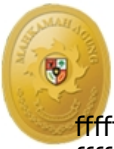

# Direktori Putusan Mahkamah Agung Republik Indonesia

putusan.mahkamahagung.go.id

ffffffffffffffffffffffffffffffffffffffffe3fe3fff83ff9f800007ffff1ff1ffffeffc787fc7ffffffff  
fffff  
ffffffffffffffffffffffffc1ffffffffffffffffffffffffffffffffffffffffc7ffe3fe3fff01ff  
9f80001ffff1ff1ffffeffc78ff87ffffffffffffffffffffffff83ffffffffffffffffffffffff  
ff  
ffffffffffffffffffffffff807fe3fe3fff01ff9fc0007ffffe1ff1ffffcf8ff87ffffffffffffffff  
fffff  
ffffffffe03ffffffffffffffffffffffffffffffff803fe3fc3fff83ff1fc001ffff  
e  
1ff1ffffcf8ff8ffffffffffffffffffffffffe07ffffffffffffffffffffffff  
ffffffffffff801fe3fc7fff87ff1fe007ffffe3fe1ffffffffc8ff8ffffffffffffffff  
ffc0f  
ffffffffffffffffffffffff980fe3fc7ffcfef1ff80ffffe3fe3fffff  
c  
f8ff0ffffffffffffffffffffffffc0ffffffffffffffffffffffffffffffff  
ffff998fc7fc7ffffe3ffe3fffffc3fe3fffffefe0f0ffffffffffffffffffffe1ffffffff  
fff  
ffffffffffffffffffffffffd98fc7fc7ffffc3fffffc7ffc3fe3ffffdfff0fffff  
ffffffffffffffffffffe3ffffffffffffffffffffffffffffd8fc7f8  
7ffffc7ffff807fc3fe3ffffffffff1ffffffffffffffffffffe3fffffffffffff  
ffffffffffffd8fc7f87ffff87ffff801fc7fe3ffffffffff1fffffffffffff  
ffffffffffffe7ffffffffffffffffffffdffc7f8ffff8fff  
fff801fc7fc3ffff9ffffe1fffffffffffffe3fffffffffffff  
ffffffffffffbfffdf87f8ffffcfffff980fc7fc7ffff01ffe1fffffffffffff  
f  
ff03ffffffffffffffffffff03ffff87f8fffff0fffd98fc7fc7  
ffff007ffe1ffffffffffff80fffffffffffff  
ffff803fff8ff8ffff03ffdd8f8ffc7ffff003ffe3ffffffffffff07ff  
ffff  
ffffffffffffe007ff87f8fffffc1ffc8f8ffc7ffff303ff  
e  
3ffffffffffff3f87ffffffffffff8  
03ff03f8ffff9f0ffcd8ffc7ffff331ffc3ffffffffffff9803fffff  
ffff  
ffffffffffffe01ff03f8ffff8c0fffd8ff8ffffb1ffc3fffff  
ffffffffffff8003ffffffffffffc0fe03f8fff  
ffff8007ffff8ff8fffb1ffc7ffffffffffffc003ffffffffffff  
ffffffffffff07e07f8fffffc00ffff07f8ffff9ffc7ffffffffffff  
ffffffe01fffffffffffffc7f0ff9ffffe3fff03fff  
fff03f8f1a05000026060f002a0a574d46430100000000001000000000000  
02000000080a00000000000082a0000fff  
ffffbffc7fffffffffffff  
ffffffe7f8fffffe03fffffe03f8ffff8fffc7fffffffffffff  
ffffffffff7f8ffff807fffffe03fcffffc1ffff87ff  
ffffffffff  
dffffffe01fff8ffe07fcffffe03fff87fffffffffffff

Disclaimer

Kepaniteraan Mahkamah Agung Republik Indonesia berusaha untuk selalu mencantumkan informasi paling kini dan akurat sebagai bentuk komitmen Mahkamah Agung untuk pelayanan publik, transparansi dan akuntabilitas pelaksanaan fungsi peradilan. Namun dalam hal-hal tertentu masih dimungkinkan terjadi permasalahan teknis terkait dengan akurasi dan keterkinian informasi yang kami sajikan, hal mana akan terus kami perbaiki dari waktu ke waktu. Dalam hal Anda menemukan inakurasi informasi yang termuat pada situs ini atau informasi yang seharusnya ada, namun belum tersedia, maka harap segera hubungi Kepaniteraan Mahkamah Agung RI melalui : Email : kepaniteraan@mahkamahagung.go.id Telp : 021-384 3348 (ext.318)





**putusan.mahkamahagung.go.id**

[illegible]

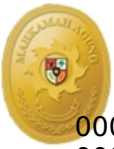

**putusan.mahkamahagung.go.id**

### Disclaimer

Kepaniteraan Mahkamah Agung Republik Indonesia berusaha untuk selalu mencantumkan informasi paling kini dan akurat sebagai bentuk komitmen Mahkamah Agung untuk pelayanan publik, transparansi dan akuntabilitas pelaksanaan fungsi peradilan. Namun dalam hal-hal tertentu masih dimungkinkan terjadi permasalahan teknis terkait dengan akurasi dan keterkinian informasi yang kami sajikan, hal mana akan terus kami perbaiki dari waktu ke waktu. Dalam hal Anda menemukan inkurasi informasi yang termuat pada situs ini atau informasi yang seharusnya ada, namun belum tersedia, maka harap segera hubungi Kepaniteraan Mahkamah Agung RI melalui :

Email : [kepaniteraan@mahkamahagung.go.id](mailto:kepaniteraan@mahkamahagung.go.id)      Telp. : 021-384 3348 (ext.318)

Halaman



**putusan.mahkamahagung.go.id**

### Disclaimer

Kepaniteraan Mahkamah Agung Republik Indonesia berusaha untuk selalu mencantumkan informasi paling kini dan akurat sebagai bentuk komitmen Mahkamah Agung untuk pelayanan publik, transparansi dan akuntabilitas pelaksanaan fungsi peradilan. Namun dalam hal-hal tertentu masih dimungkinkan terjadi permasalahan teknis terkait dengan akurasi dan keterkinian informasi yang kami sajikan, hal mana akan terus kami perbaiki dari waktu ke waktu. Dalam hal Anda menemukan inakurasi informasi yang termuat pada situs ini atau informasi yang seharusnya ada, namun belum tersedia, maka harap segera hubungi Kepaniteraan Mahkamah Agung RI melalui :

Email : [kepaniteraan@mahkamahagung.go.id](mailto:kepaniteraan@mahkamahagung.go.id)      Telp. : 021-384 3348 (ext.318)

Halaman

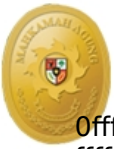



# Direktori Putusan Mahkamah Agung Republik Indonesia

putusan.mahkamahagung.go.id

fffff  
ffffffffffffffffffffffff0fffffffffffffffffffffffffffffffffffffffffc1ffffffff1fe3fff  
ffffbffc00003ff1ff0fffcffc7c7fc7fffffffffffffffffffffffffffffffffe0fffffffffffffffffffff  
ff  
fffffffffffffffffffffffffffffe1fe3ffc7ff9fbfc0007fff1ff1fffcffc787fc7fffffffffffff  
fffff  
ffffffffffffc1fffffffffffffffffffffffffffffffffffffe3fe3fff83ff9f800007  
ffff1ff1fffeffc787fc7ffffffffffffffffffffffffffffc1fffffffffffffffffffffffffffff  
ffffffffffffffffffffc7fe3fe3fff01ff9f80001ffff1ff1fffeffc78ff87fffffffffffffffffffff  
fffff  
ff83ffffffffffffffffffffffffffffffffffffffff807fe3fe3fff01ff9fc0007ffffe1ff1  
ffff  
fffc8ff87fffffffffffffffffffffffffffffe03fffffffffffffffffffffffffffffffffffff  
ffffffff803fe3fc3fff83ff1fc001ffffe1ff1fffffc8ff8fffffffffffffffffffffffffffffe07ff  
fffff  
ffffffffffffffffffffffffffffffffffffffff801fe3fc7fff87ff1fe007ffffe3fe1ffffffffcf8ff  
8fff  
ffffffffffffffffffffffffffffffffffffffffc0ffffffffffffffffffffffffffffffffffff980f  
e3fc7fffcfe1ff80fffffe3fe3ffffffffcf8ff0ffffffffffffffffffffffffffffc0fffffffffffff  
f  
ffffffffffffffffffffffffffffffffffff998fc7fc7fffffe3ffe3fffffc3fe3fffffefe0ffffffffff  
f  
ffffffffffffffffffffe1ffffffffffffffffffffffffffffffffffffd98fc7fc7fffffc  
3fffffc7fc3fe3fffffddff0fffffffffffffffffffffffffffffe3fffffffffffffffffffff  
ffffffffffffffffffffd8fc7f87fffffc7ffff807fc3fe3ffffffff1fffffffffffffffffffff  
ffffffffffe3ffffffffffffffffffffffffffffffffffffd8fc7f87ffff87ffff801fc  
7fe3ffffffff1fffffffffffffffffffffffffffffe7fffffffffffffffffffffffffffff  
ffffffffffffdffc7f8ffff8ffff801fc7fc3ffff9ffffe1fffffffffffffffffffffe3ffff  
f  
ffffffffffffffffffffffffffffffffffffbffd87f8fffffcfffff980fc7fc7ffff01  
fffe1ffffffffffffffffffffffffffff03fffffffffffffffffffffffffffff  
ff03ffff87f8ffffffffffe0fffd98fc7fc7ffff007ffe1fffffffffffffffffffff80ffffffffff  
fffff  
ffffffffffffffffffffffffffff803fff8ff8ffffffffff03fdd8f8ffc7ffff003ffe3ffff  
fff  
ffffffffffffffffffff07ffffffffffffffffffffffffffffffffffe007ff87f8  
fffffffffc1fffc8f8ffc7ffff303ffe3fffffffffffffffffffff3f87fffffffffffff  
ffffffffffffffffffff803ff03f8ffffffffff9f0ffcd8ffc7ffff331ffc3ffffffffff  
fff  
ffffffffffff9803ffffffffffffffffffffffffffffffffffe01ff03f8ffffffffff8c  
0ffffd8ff8fffffbb1ffc3fffffffffffffffffffff8003fffffffffffffffffffff  
ffffffffffffc0fe03f8ffffffffff8007ffff8ff8fffffbb1ffc7fffffffffffff  
fc003ffffffffffffffffffffffffff07e07f8ffffffffffc00ffff07f8f  
ffff9ffc7ffffffffffffffffffe01ffffffffffffffffff  
ffffffffffffc7f0ff9fffffe3fff03ffff03f8ffffffffffbffc7ffffffffffffffffff  
ffffffffffffffffffe7f8ffffffffffe03ffffffffffe03f8ffff8ffffc



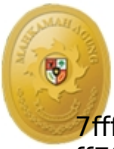

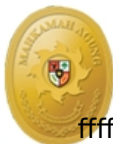

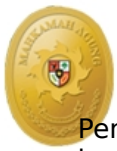

## Direktori Putusan Mahkamah Agung Republik Indonesia

putusan.mahkamahagung.go.id

Pengadilan Agama tersebut;\par Setelah mempelajari berkas perkara yang bersangkutan;\par Setelah mendengar keterangan Penggugat di muka persidangan;\par\pard\itap0\widctlpar\qc\sb120\sa120\sl360\slmult1 DUDUK PERKARA\par\pard\itap0\widctlpar\qj\fi709\sl360\slmult1 Bahwa, Penggugat dengan surat gugatannya tertanggal 16 November 2020 yang telah terdaftar di Kepaniteraan Pengadilan Agama Sumber dibawah Nomor 6592/Pdt.G/2020/PA.Sbr tanggal 16 November 2020, telah mengajukan hal-hal sebagai berikut :\par{\listtext\pard\plain\fs24

1.\tab}\pard\itap0\widctlpar\qj\fi-360\li360\sl360\slmult1\tx360\ls1\ilvl0

Bahwa Penggugat telah melangsungkan pernikahan dengan Tergugat pada tanggal 11 Juli 2005, dicatat di

\plain\fs24{\txfielddef{\\*\txfieldstart\txfieldtype4\txfieldflags0}

{\\*\txfieldddatadef\txfieldddatatype4\txfieldddata

740065007800740035000000}{\\*\txfieldtext {\\*\txfieldend}}{\\*\bkmkstart

text5}{\\*\bkmkend text5}}\plain\fs24 Kantor Urusan Agama Kecamatan

Gegesik Kabupaten Cirebon, dengan Akta Nikah Nomor 390/45/III/2005

tanggal 11 Juli 2005;\par{\listtext\pard\plain\fs24 2.\tab}\ls1\ilvl0 Bahwa

setelah akad nikah Penggugat dan Tergugat membina rumah tangga dengan bertempat tinggal terakhir di rumah ....., telah hidup rukun sebagai mana layaknya suami isteri

\plain\fs24{\txfielddef{\\*\txfieldstart\txfieldtype4\txfieldflags0}

{\\*\txfieldddatadef\txfieldddatatype4\txfieldddata

540065007800740036000000}{\\*\txfieldtext {\\*\txfieldend}}{\\*\bkmkstart

Text6}{\\*\bkmkend Text6}}\plain\fs24 belum dikaruniai anak .... / .... sudah

dikaruniai anak ..... orang bernama ;\par{\listtext\pard\plain\fs24

3.\tab}\ls1\ilvl0 Bahwa selama berumah tangga Penggugat dengan Tergugat

belum pernah bercerai ;\par{\listtext\pard\plain\fs24 4.\tab}\ls1\ilvl0

Bahwa awalnya keadaan rumah tangga Penggugat dengan Tergugat berjalan

dengan rukun dan harmonis, akan tetapi sekitar bulan 1 keharmonisan

tersebut mulai pudar, karena antara Penggugat dan Tergugat sering terjadi

perseilisan dan pertengkaran yang mencapai puncaknya pada bulan

1;\par{\listtext\pard\plain\fs24 5.\tab}\ls1\ilvl0 Bahwa perselisihan dan

pertengkaran Penggugat dan Tergugat tersebut disebabkan

\plain\fs24{\txfielddef{\\*\txfieldstart\txfieldtype4\txfieldflags0}

{\\*\txfieldddatadef\txfieldddatatype4\txfieldddata

5400650078007400310030000000}{\\*\txfieldtext {\\*\txfieldend}}{\\*\bkmkstart

Text10}{\\*\bkmkend Text10}}\plain\fs24

1;\par{\listtext\pard\plain\fs24 6.\tab}\ls1\ilvl0 Bahwa akibat rumah

tangga Penggugat dan Tergugat yang sering terjadi perselisihan dan

pertengkaran tersebut, maka Penggugat dan #0047 berpisah tempat tinggal

selama .....bulan/tahun;\par{\listtext\pard\plain\fs24

7.\tab}\pard\itap0\widctlpar\qj\fi-357\li357\sl360\slmult1\tx357\ls1\ilvl0

Bahwa Penggugat telah berusaha bersabar dan berupaya mempertahankan

keutuhan rumah tangga, akan tetapi tidak berhasil, sehingga untuk

mencapai tujuan perkawinan yang sakinah, mawaddah dan rahmah tidak

mungkin bisa terwujud, oleh karenanya cukup alasan bagi Penggugat untuk

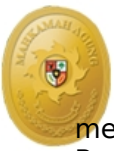

## Direktori Putusan Mahkamah Agung Republik Indonesia

[putusan.mahkamahagung.go.id](http://putusan.mahkamahagung.go.id)

mengajukan perceraian ini;\par\pard\itap0\widctlpar\qj\fi709\sl360\slmult1 Berdasarkan dalil-dalil/alasan tersebut diatas, Penggugat mohon dengan hormat, kiranya bapak Ketua Pengadilan Agama Sumber cq. Majelis Hakim yang memeriksa dan mengadili perkara ini, berkenan untuk menjatuhkan putusan yang amarnya berbunyi sebagai berikut

:\par{\listtext\pard\plain\fs24 1.\tab}\pard\itap0\widctlpar\qj\fi-284\li284\sl360\slmult1\tx284\sl1\ilvl3 Mengabulkan gugatan Penggugat;\par{\listtext\pard\plain\fs24 2.\tab}\li1\ilvl3 Menjatuhkan talak satu bain sughra Tergugat (\plain\fs24\cf1 SARIKA BIN DABAS\plain\fs24 ) terhadap Penggugat (SATIAH BINTI MISTA);\par{\listtext\pard\plain\fs24 3.\tab}\li1\ilvl3 Membebaskan biaya perkara menurut hukum;\par\pard\itap0\widctlpar\qj\sl360\slmult1 Atau apabila Pengadilan berpendapat lain, mohon putusan yang seadil-adilnya;\par\pard\itap0\widctlpar\qj\fi709\sl360\slmult1 Bahwa, pada hari sidang yang telah ditetapkan, Penggugat datang menghadap di muka persidangan, sedangkan \plain\fs24\cf1 Tergugat \plain\fs24 tidak datang dan tidak pula menyuruh orang lain sebagai wakil atau kuasanya yang sah, padahal kepadanya telah dipanggil dengan resmi dan patut berdasarkan berita acara relaas panggilan tanggal 17 Desember 2020 dan 17 Desember 2020, sedangkan tidak ternyata ketidakhadirannya itu disebabkan oleh suatu alasan yang sah menurut hukum;\par Bahwa, Majelis Hakim telah berusaha menasehati Penggugat agar Penggugat dapat membina kembali rumah tangganya dengan \plain\fs24\cf1 Tergugat\plain\fs24 ;\par Bahwa, atas nasehat tersebut Penggugat mengatakan akan mencabut perkaranya dengan alasan Penggugat akan kembali rukun membina rumah tangga dengan Tergugat;\par Bahwa, selanjutnya Majelis Hakim bermusyawarah;\par\pard\s23\itap0\widctlpar\qj\fi720\sl360\slmult1\plain\fs24 s22 Bahwa, \plain\fs24 untuk mempersingkat uraian pertimbangan ini ditunjuk hal-hal sebagaimana tercantum dalam berita acara persidangan perkara ini;\par\pard\itap0\widctlpar\qj\fi720\sb120\sa120\sl360\slmult1 PERTIMBANGAN HUKUM\par\pard\s23\itap0\widctlpar\qj\fi720\sl360\slmult1 Menimbang, bahwa maksud dan tujuan gugatan Penggugat adalah sebagaimana terurai diatas;\par Menimbang, bahwa sesuai dengan maksud dan ketentuan Pasal \plain\fs24\cf1 82 Undang-Undang Nomor 7 Tahun 1989 \plain\fs24 tentang Peradilan Agama sebagaimana telah diubah dengan Undang-Undang Nomor 3 Tahun 2006 dan perubahan kedua dengan Undang-Undang Nomor 50 Tahun 2009, Majelis Hakim telah berusaha maksimal menasehati Penggugat agar Penggugat dapat rukun kembali membina rumah dengan Tergugat dan ternyata usaha tersebut berhasil;\par\pard\s19\itap0\widctlpar\qj\fi709\sl360\slmult1 Menimbang, bahwa Penggugat di muka sidang mengatakan akan mencabut perkaranya dengan alasan akan kembali rukun dengan Tergugat;\par\pard\s23\itap0\widctlpar\qj\fi720\sl360\slmult1 Menimbang, bahwa oleh karena Penggugat mengatakan akan mencabut perkaranya dengan alasan sebagai mana tersebut di atas, maka Majelis Hakim

### Disclaimer

Kepaniteraan Mahkamah Agung Republik Indonesia berusaha untuk selalu mencantumkan informasi paling kini dan akurat sebagai bentuk komitmen Mahkamah Agung untuk pelayanan publik, transparansi dan akuntabilitas pelaksanaan fungsi peradilan. Namun dalam hal-hal tertentu masih dimungkinkan terjadi permasalahan teknis terkait dengan akurasi dan keterkinian informasi yang kami sajikan, hal mana akan terus kami perbaiki dari waktu ke waktu. Dalam hal Anda menemukan inakurasi informasi yang termuat pada situs ini atau informasi yang seharusnya ada, namun belum tersedia, maka harap segera hubungi Kepaniteraan Mahkamah Agung RI melalui :

Email : [kepaniteraan@mahkamahagung.go.id](mailto:kepaniteraan@mahkamahagung.go.id) Telp : 021-384 3348 (ext.318)



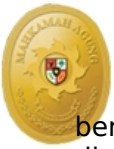



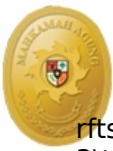

# Direktori Putusan Mahkamah Agung Republik Indonesia

putusan.mahkamahagung.go.id

Anggota Hakim  
Anggota Hakim

Anggota Hakim

Drs. H. TAUFIQURROKHMAN, M.H. \cell H. ABDUL HANAN, SH.,MH

1 Panitera

Pengganti

FERI NURJAMAN S.H.I.

Perincian Biaya Perkara

(lima ratus satu ribu

## Disclaimer

Kepaniteraan Mahkamah Agung Republik Indonesia berusaha untuk selalu mencantumkan informasi paling kini dan akurat sebagai bentuk komitmen Mahkamah Agung untuk pelayanan publik, transparansi dan akuntabilitas pelaksanaan fungsi peradilan. Namun dalam hal-hal tertentu masih dimungkinkan terjadi permasalahan teknis terkait dengan akurasi dan keterkinian informasi yang kami sajikan, hal mana akan terus kami perbaiki dari waktu ke waktu. Dalam hal Anda menemukan inakurasi informasi yang termuat pada situs ini atau informasi yang seharusnya ada, namun belum tersedia, maka harap segera hubungi Kepaniteraan Mahkamah Agung RI melalui : Email : kepaniteraan@mahkamahagung.go.id Telp : 021-384 3348 (ext.318)

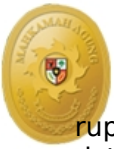

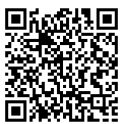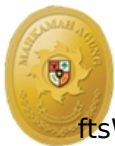

# Direktori Putusan Mahkamah Agung Republik Indonesia

putusan.mahkamahagung.go.id

ftsWidthB3\trftsWidthA3\trpaddl108\trpaddr108\trpaddf3\trpaddft3\trpaddfr3  
\trpaddfb3\clvertalt\clftsWidth3\clwWidth8789\cellx8789\row\pard\itap0\widct  
lpar\qj\par\pard\itap0\widct\par\qj\li3600\tx3600  
ttd\par\pard\itap0\widct\par\qj\par\par\trrowd\irow0\irowband0\lastrow\trgaph  
108\trleft0\trftsWidth1\trftsWidthB3\trftsWidthA3\trpaddl108\trpaddr108\trpa  
ddf3\trpaddft3\trpaddfr3\trpaddfb3\clvertalt\clftsWidth3\clwWidth8789\cellx  
8789\pard\intbl\widct\par\qc\sl276\slmult1\plain\f5\fs24\b FERI NURJAMAN  
S.H.I.\cell\trrowd\irow0\irowband0\lastrow\trgaph108\trleft0\trftsWidth1\trftsWi  
dthB3\trftsWidthA3\trpaddl108\trpaddr108\trpaddf3\trpaddft3\trpaddfr3\trpa  
ddfb3\clvertalt\clftsWidth3\clwWidth8789\cellx8789\row\pard\itap0\widct\par  
qj\sl360\slmult1\plain\f5\fs24\par\pard\itap0\widct\par\qj\sl360\slmult1\tx720\  
tx1440\tx2160\tx2880\tx3600\tx4320\tx5040\tx5760\tx6480\tx7200\tx7920\  
tx8640\tx9360\tx10080 Perincian Biaya Perkara  
:\par\pard\itap0\widct\par\qj\sl360\slmult1\tx3686\tx3969\tx6237\tx6480\  
tx7200\tx7920\tx8640\tx9360\tx10080\tx10800\tx11520\tx12240\tx12960\tx  
13680 1. Biaya Pendaftaran\tab : \tab Rp.\tab 30.000,00\par 2. Biaya  
Proses\tab : \tab Rp.\tab 50.000,00\par 3. Biaya Panggilan \tab : \tab Rp. \tab  
385.000,00\par 4. Biaya PNPB Panggilan\tab : \tab Rp.\tab 20.000,00\par 5.  
Biaya Redaksi\tab : \tab Rp.\tab 10.000,00\par 6. Biaya materai\tab  
:\plain\f5\fs24\ul\tab Rp.\tab 6.000,00\plain\f5\fs24\par Jumlah\tab\tab  
Rp.\tab 501.000,00  
\par\pard\itap0\widct\par\qj\sl360\slmult1\tx6237\tx6480\tx7200\tx7920\tx  
8640\tx9360\tx10080\tx10800\tx11520\tx12240\tx12960\tx13680\tx14400\  
tx15120\tab (lima ratus satu ribu  
rupiah)\par\pard\itap0\widct\par\qj\sl360\slmult1\par Dicatat disini  
:\par{\pntext\pard\plain\f6\fs24'2d\tab}\pard\sl20\itap0\widct\par\qj\fi-  
284\li284\sl360\slmult1\tx284\ls2\ilvl0{\\*\pn\pnlvlblt\ilvl0\ls2\pnstart1\pnf6\p  
nfs24\pnb0\pni0\pnstrike0\pnulnone\pncf0\pncb0{\pntxtb '2d}}Amar  
penetapan tersebut telah diberitahukan kepada Tergugat pada tanggal  
\par\pard\itap0\widct\par\qj\sl360\slmult1\tx6237\par\pard\itap0\widct\par  
\li4536\sb120\tx4536 Untuk salinan yang sama bunyinya\par  
Panitera,\par\pard\itap0\widct\par\qc\li4536\sb120\tx4536\par\par\pard\itap0\  
widct\par\qj\li4536\sb120\sl360\slmult1\tx4536\plain\f5\fs24\b Drs. H. Jaenal,  
MH.\plain\f5\fs24\par\pard\itap0\widct\par\plain\f1\fs24\par\par }

## Disclaimer

Kepaniteraan Mahkamah Agung Republik Indonesia berusaha untuk selalu mencantumkan informasi paling kini dan akurat sebagai bentuk komitmen Mahkamah Agung untuk pelayanan publik, transparansi dan akuntabilitas pelaksanaan fungsi peradilan. Namun dalam hal-hal tertentu masih dimungkinkan terjadi permasalahan teknis terkait dengan akurasi dan keterkinian informasi yang kami sajikan, hal mana akan terus kami perbaiki dari waktu ke waktu. Dalam hal Anda menemukan inakurasi informasi yang teruat pada situs ini atau informasi yang seharusnya ada, namun belum tersedia, maka harap segera hubungi Kepaniteraan Mahkamah Agung RI melalui : Email : [kepaniteraan@mahkamahagung.go.id](mailto:kepaniteraan@mahkamahagung.go.id) Telp : 021-384 3348 (ext.318)
