# Supplementary material for: Classification of divorce causes during the COVID-19 pandemic using convolutional neural networks
Source: PeerJ journal article supplement (doi:10.7717/peerj-cs.998), 2022-06-30
Supplement: KDRT_Dataset.zip [file KDRT_Dataset.zip]

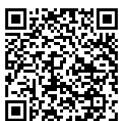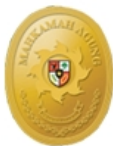

**SALINAN PUTUSAN**  
**Nomor 2331/Pdt.G/2020/PA.Tmk**

بِسْمِ اللَّهِ الرَّحْمَنِ الرَّحِيمِ

**DEMI KEADILAN BERDASARKAN KETUHANAN YANG MAHA ESA**

Pengadilan Agama Kota Tasikmalaya yang memeriksa dan mengadili perkara tertentu pada tingkat pertama dalam sidang majelis telah menjatuhkan putusan perkara cerai gugat antara:

**PENGUGAT**, umur 23 tahun, agama Islam, pekerjaan Mengurus Rumah Tangga, pendidikan SLTA, tempat kediaman di Kota Tasikmalaya, sebagai **Penggugat**;

melawan

**TERGUGAT**, umur 24 tahun, agama Islam, pekerjaan Karyawan Swasta, tempat kediaman di Kota Tasikmalaya, sebagai **Tergugat**;

Pengadilan Agama tersebut;

Telah mempelajari berkas perkara;

Telah mendengar keterangan Penggugat serta memeriksa bukti-bukti di persidangan;

**DUDUK PERKARA**

Bahwa Penggugat dengan surat gugatannya tanggal 08 Desember 2020 telah mengajukan gugatan cerai gugat yang didaftar di Kepaniteraan Pengadilan Agama Kota Tasikmalaya dengan Nomor 2331/Pdt.G/2020/PA.Tmk, tanggal 08 Desember 2020, dengan dalil-dalil yang pada pokoknya sebagai berikut:

1. Bahwa, pada hari Sabtu tanggal 24 Agustus 2019 M Penggugat telah melangsungkan pernikahannya dengan Tergugat di hadapan Pegawai Pencatat Nikah Kantor Urusan Agama Kecamatan Bungursari Kota Tasikmalaya sebagaimana telah ternyata dalam kutipan akta nikah Nomor : 0320/054/VIII/2019 Tercatat 26 Agustus 2019;

Halaman 1 dari 11 halaman, Putusan Nomor 2331/Pdt.G/2020/PA.Tmk

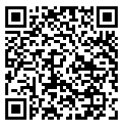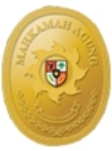

## Direktori Putusan Mahkamah Agung Republik Indonesia

putusan.mahkamahagung.go.id

2. Bahwa, Penggugat dengan Tergugat pernah merasakan kehidupan rumah tangga yang rukun dan bahagia yaitu kurang lebih sepuluh bulan dan tidak di karuniai anak;
3. Bahwa, akan tetapi dalam kehidupan rumah tangga selanjutnya pada sekitar kurang lebih pertengahan tahun 2020 kehidupan rumah tangga Penggugat dengan Tergugat mulai goyah atau tidak harmonis, dan terjadi perselisihan terus menerus hal tersebut di karenakan sudah tidak ada saling pengertian dan kesepahaman antara Penggugat dan Tergugat, dikarenakan Tergugat kurang memberikan nafkah lahir kepada Penggugat serta Tergugat mempunyai wanita idaman lain;
4. Bahwa akibat hal tersebut Penggugat dan Tergugat telah pisah rumah sampai dengan sekarang kurang lebih dua bulan;
5. Bahwa permasalahan ini pernah di musyawarahkan secara kekeluargaan antara Penggugat dan Tergugat akan tetapi tidak mendapatkan titik temu;
6. Bahwa, tujuan dari suatu perkawinan sesuai dengan Pasal 1 UU No. 1 tahun 1974 tentang Perkawinan adalah untuk membangun suatu keluarga yang harmonis yang harus dibina bersama antara Penggugat dengan Tergugat, akan tetapi hal itu sudah tidak bisa dicapai lagi sehingga jalan satu-satunya penyelesaian terakhir dan terbaik untuk kedua belah pihak adalah Perceraian;
7. Bahwa, berdasarkan hal-hal tersebut diatas, maka cukup beralasan kiranya bagi Penggugat untuk mengajukan Perceraian ini di Pengadilan Agama Kota Tasikmalaya.

Berdasarkan alasan/dalil-dalil diatas, maka Penggugat mohon kepada Ketua Pengadilan Agama Kota Tasikmalaya cq. Majelis Hakim yang memeriksa dan mengadili perkara ini, berkenan menjatuhkan putusan sebagai berikut :

1. Menerima dan mengabulkan Gugatan Penggugat;
2. Menjatuhkan thalak 1(satu) ba'in Sughro Tergugat (TERGUGAT) kepada Penggugat (PENGGUGAT);
3. Menetapkan biaya perkara menurut hukum.

Halaman 2 dari 11 halaman, Putusan Nomor 2331/Pdt.G/2020/PA.Tmk

#### Disclaimer

Kepaniteraan Mahkamah Agung Republik Indonesia berusaha untuk selalu mencantumkan informasi paling kini dan akurat sebagai bentuk komitmen Mahkamah Agung untuk pelayanan publik, transparansi dan akuntabilitas pelaksanaan fungsi peradilan. Namun dalam hal-hal tertentu masih dimungkinkan terjadi permasalahan teknis terkait dengan akurasi dan keterkinian informasi yang kami sajikan, hal mana akan terus kami perbaiki dari waktu ke waktu. Dalam hal Anda menemukan inakurasi informasi yang termuat pada situs ini atau informasi yang seharusnya ada, namun belum tersedia, maka harap segera hubungi Kepaniteraan Mahkamah Agung RI melalui : Email : [kepaniteraan@mahkamahagung.go.id](mailto:kepaniteraan@mahkamahagung.go.id) Telp : 021-384 3348 (ext.318)

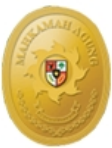

# Direktori Putusan Mahkamah Agung Republik Indonesia

putusan.mahkamahagung.go.id

Bahwa pada hari sidang yang telah ditetapkan Penggugat telah datang menghadap ke muka sidang, sedangkan Tergugat tidak datang menghadap ke muka sidang dan tidak menyuruh orang lain untuk menghadap sebagai wakil/kuasa hukumnya meskipun telah dipanggil secara resmi dan patut menurut relaas Nomor 2331/Pdt.G/2020/PA.Tmk tanggal 10 Desember 2020 dan 17 Desember 2020 yang dibacakan di dalam sidang, sedangkan tidak ternyata bahwa tidak datangnya itu disebabkan suatu halangan yang sah;

Bahwa majelis hakim telah menasehati Penggugat agar berpikir untuk tidak bercerai dengan Tergugat, tetapi Penggugat tetap pada dalil-dalil gugatannya untuk bercerai dengan Tergugat;

Bahwa perkara ini tidak dapat dimediasi karena Tergugat tidak pernah datang menghadap meskipun telah dipanggil secara resmi dan patut, selanjutnya dimulai pemeriksaan dengan membacakan surat gugatan Penggugat yang maksud dan isinya tetap dipertahankan oleh Penggugat;

Bahwa untuk menguatkan dalil-dalil gugatan Penggugat telah mengajukan alat-alat bukti berupa:

## A. Surat:

1. Fotokopi Kartu Tanda Penduduk atas Nama XXXXXX Nomor 3278047003970001 Tanggal 02 September 2020 yang dikeluarkan oleh Kantor Pemerintah Kota Tasikmalaya, bukti surat tersebut telah diberi meterai cukup, dinazegelen pos dan telah dicocokkan dengan aslinya yang ternyata sesuai, lalu oleh Ketua Majelis diberi tanda P.1;
2. Fotokopi Kutipan Akta Nikah Nomor 0320/054/VIII/2019 Tanggal 26 Agustus 2019, yang dikeluarkan oleh KUA Bungursari Kota Tasikmalaya, bukti surat tersebut telah diberi meterai cukup, telah dinazegelen pos dan telah dicocokkan dengan aslinya yang ternyata sesuai, lalu oleh Ketua Majelis diberi tanda P.2;

## B. Saksi:

1. XXXXX, umur 45 tahun, agama Islam, pekerjaan tetangga Penggugat, bertempat tinggal di Kota Tasikmalaya, di bawah sumpahnya memberikan keterangan sebagai berikut:

Halaman 3 dari 11 halaman, Putusan Nomor 2331/Pdt.G/2020/PA.Tmk

### Disclaimer

Kepaniteraan Mahkamah Agung Republik Indonesia berusaha untuk selalu mencantumkan informasi paling kini dan akurat sebagai bentuk komitmen Mahkamah Agung untuk pelayanan publik, transparansi dan akuntabilitas pelaksanaan fungsi peradilan. Namun dalam hal-hal tertentu masih dimungkinkan terjadi permasalahan teknis terkait dengan akurasi dan keterkinian informasi yang kami sajikan, hal mana akan terus kami perbaiki dari waktu ke waktu. Dalam hal Anda menemukan inakurasi informasi yang termuat pada situs ini atau informasi yang seharusnya ada, namun belum tersedia, maka harap segera hubungi Kepaniteraan Mahkamah Agung RI melalui : Email : [kepaniteraan@mahkamahagung.go.id](mailto:kepaniteraan@mahkamahagung.go.id) Telp : 021-384 3348 (ext.318)



## Direktori Putusan Mahkamah Agung Republik Indonesia

putusan.mahkamahagung.go.id

- Bahwa, saksi kenal Penggugat dan Tergugat dan memiliki hubungan dengan Penggugat sebagai ibu kandung Penggugat;
- Bahwa, saksi mengetahui Penggugat dan Tergugat menikah pada tanggal 24 Agustus 2019 di KUA Bungursari Kota Tasikmalaya;
- Bahwa setelah menikah Penggugat dan Tergugat tinggal bersama di rumah kediaman bersama;
- Bahwa, saksi mengetahui antara Penggugat dan Tergugat belum dikaruniai anak.;
- Bahwa, saksi mengetahui keadaan rumah tangga Penggugat dan Tergugat pada awalnya rukun dan harmonis, akan tetapi kurang lebih sejak pertengahan tahun 2020 sudah tidak rukun lagi sering terjadi pertengkaran;
- Bahwa, saksi sering melihat dan mendengar langsung perselisihan dan pertengkaran Penggugat dan Tergugat;
- Bahwa, saksi mengetahui yang menjadi penyebab ketidak harmonisan rumah tangga Penggugat dan Tergugat disebabkan karena Tergugat kurang dalam memberi nafkah kepada Penggugat sehingga tidak dapat memenuhi kebutuhan rumah tangga dan Tergugat juga menjalin hubungan dengan janda yang bernama Rena;
- Bahwa, saksi mengetahui antara Penggugat dan Tergugat sudah pisah rumah sejak 2 bulan yang lalu sampai dengan sekarang dan sudah tidak bersatu lagi;
- Bahwa, baik saksi maupun pihak keluarga sudah berusaha merukunkan Penggugat dan Tergugat akan tetapi tidak berhasil;
- Bahwa sejak berpisah tersebut sampai dengan sekarang antara Penggugat dan Tergugat sudah tidak lagi menjalankan kewajiban sebagaimana layaknya suami istri;

Halaman 4 dari 11 halaman, Putusan Nomor 2331/Pdt.G/2020/PA.Tmk

#### Disclaimer

Kepaniteraan Mahkamah Agung Republik Indonesia berusaha untuk selalu mencantumkan informasi paling kini dan akurat sebagai bentuk komitmen Mahkamah Agung untuk pelayanan publik, transparansi dan akuntabilitas pelaksanaan fungsi peradilan. Namun dalam hal-hal tertentu masih dimungkinkan terjadi permasalahan teknis terkait dengan akurasi dan keterkinian informasi yang kami sajikan, hal mana akan terus kami perbaiki dari waktu ke waktu. Dalam hal Anda menemukan inakurasi informasi yang termuat pada situs ini atau informasi yang seharusnya ada, namun belum tersedia, maka harap segera hubungi Kepaniteraan Mahkamah Agung RI melalui :

Email : kepaniteraan@mahkamahagung.go.id Telp : 021-384 3348 (ext.318)



## Direktori Putusan Mahkamah Agung Republik Indonesia

putusan.mahkamahagung.go.id

- Bahwa, saksi melihat rumah tangga Penggugat dan Tergugat sudah tidak mungkin lagi dipertahankan, sulit dipertahankan dan tidak ada harapan dapat bersatu lagi sehingga lebih baik bercerai;
- 2. XXXXXX, umur 27 tahun, agama Islam, pekerjaan Mengurus rumah tangga, bertempat tinggal di Kota Tasikmalaya, di bawah sumpahnya memberikan keterangan sebagai berikut:
  - Bahwa, saksi kenal dengan Penggugat dan Tergugat dan memiliki hubungan dengan Penggugat sebagai tetangga Penggugat;
  - Bahwa, saksi mengetahui Penggugat dan Tergugat adalah suami isteri yang sah yang menikah pada tanggal 24 Agustus 2019 di KUA Bungursari Kota Tasikmalaya;
  - Bahwa setelah menikah Penggugat dan Tergugat tinggal bersama di rumah kediaman bersama
  - Bahwa, saksi mengetahui dari perkawinan Penggugat dan Tergugat belum dikaruniai anak.;
  - Bahwa, saksi mengetahui rumah tangga Penggugat dan Tergugat sudah tidak lagi harmonis, sering terjadi perselisihan dan pertengkaran sejak pertengahan tahun 2020 yang mengakibatkan antara Penggugat dan Tergugat sudah pisah rumah sejak 2 bulan yang lalu sampai dengan sekarang dan selama berpisah antara Penggugat dan Tergugat tidak pernah bersatu lagi;
  - Bahwa, saksi sering melihat dan mendengar Penggugat dan Tergugat bertengkar;
  - Bahwa, saksi mengetahui perselisihan dan pertengkaran Penggugat dan Tergugat disebabkan karena masalah ekonomi, Tergugat kurang dalam memberi nafkah kepada Penggugat sehingga tidak dapat memenuhi kebutuhan rumah tangganya dan Tergugat juga menjalin hubungan dengan janda yang bernama Rena;
  - Bahwa, pihak keluarga sudah ada upaya mendamaikan dan merukunkan Penggugat dan Tergugat akan tetapi tidak berhasil;

Halaman 5 dari 11 halaman, Putusan Nomor 2331/Pdt.G/2020/PA.Tmk

#### Disclaimer

Kepaniteraan Mahkamah Agung Republik Indonesia berusaha untuk selalu mencantumkan informasi paling kini dan akurat sebagai bentuk komitmen Mahkamah Agung untuk pelayanan publik, transparansi dan akuntabilitas pelaksanaan fungsi peradilan. Namun dalam hal-hal tertentu masih dimungkinkan terjadi permasalahan teknis terkait dengan akurasi dan keterkinian informasi yang kami sajikan, hal mana akan terus kami perbaiki dari waktu ke waktu. Dalam hal Anda menemukan inakurasi informasi yang termuat pada situs ini atau informasi yang seharusnya ada, namun belum tersedia, maka harap segera hubungi Kepaniteraan Mahkamah Agung RI melalui : Email : [kepaniteraan@mahkamahagung.go.id](mailto:kepaniteraan@mahkamahagung.go.id) Telp : 021-384 3348 (ext.318)



# Direktori Putusan Mahkamah Agung Republik Indonesia

putusan.mahkamahagung.go.id

- Bahwa sejak berpisah tersebut sampai dengan sekarang antara Penggugat dan Tergugat sudah tidak lagi menjalankan kewajiban sebagaimana layaknya suami istri;
- Bahwa, saksi sudah tidak sanggup lagi merukunkan Penggugat dan Tergugat karena sudah sulit dirukunkan dan sudah tidak ada harapan dapat bersatu lagi dan melihat keadaan rumah tangganya lebih baik bercerai;

Bahwa Penggugat telah menyampaikan kesimpulan yang pada pokoknya tetap pada gugatan dan mohon putusan yang mengabulkan tuntutan Penggugat;

Bahwa, untuk mempersingkat uraian putusan ini maka semua hal yang termuat dalam berita acara sidang ini merupakan bagian yang tidak terpisahkan dari putusan ini;

## **PERTIMBANGAN HUKUM**

Menimbang, bahwa maksud dan tujuan gugatan Penggugat adalah sebagaimana terurai di atas;

Menimbang, bahwa ternyata Tergugat, meskipun dipanggil secara resmi dan patut, tidak datang menghadap di muka sidang dan pula tidak ternyata bahwa tidak datangnya itu disebabkan suatu halangan yang sah;

Menimbang, bahwa Tergugat yang dipanggil secara resmi dan patut sesuai ketentuan Pasal 26 ayat (1) Peraturan Pemerintah Nomor 9 Tahun 1975, akan tetapi tidak datang menghadap harus dinyatakan tidak hadir dan gugatan tersebut harus diperiksa secara verstek;

Menimbang, bahwa oleh karena itu, maka putusan atas perkara ini dapat dijatuhkan tanpa hadirnya Tergugat (verstek);

Menimbang, bahwa sesuai dengan Pasal 39 Undang-undang Nomor 1 Tahun 1974, jo. Pasal 65 Undang-undang Nomor 7 Tahun 1989, sebagaimana telah diubah dengan Undang-undang Nomor 3 Tahun 2006 dan terakhir diubah dengan Undang-undang Nomor 50 Tahun 2009, jo. Pasal 115 Kompilasi Hukum Islam, Majelis Hakim pada setiap kali persidangan telah berusaha semaksimal mungkin menasehati Penggugat untuk bersabar agar bisa membina rumah

Halaman 6 dari 11 halaman, Putusan Nomor 2331/Pdt.G/2020/PA.Tmk





## Direktori Putusan Mahkamah Agung Republik Indonesia

putusan.mahkamahagung.go.id

tangga dengan rukun dan harmonis akan tetapi tidak berhasil, oleh karena itu perkara ini harus segera diputuskan;

Menimbang, bahwa oleh karena Tergugat tidak pernah datang menghadap meskipun telah dipanggil secara resmi dan patut maka sesuai Pasal 4 angka (2) huruf b Peraturan Mahkamah Agung Republik Indonesia Nomor 1 Tahun 2016 tentang Prosedur Mediasi di Pengadilan, perkara ini termasuk sengketa yang dikecualikan dari kewajiban mediasi;

Menimbang, bahwa berdasarkan ketentuan Pasal 125 ayat (1) HIR. yaitu putusan yang dijatuhkan tanpa hadirnya Tergugat dapat dikabulkan sepanjang berdasarkan hukum dan beralasan, oleh karena itu majelis membebani Penggugat untuk membuktikan dalil-dalil gugatannya;

Menimbang, bahwa untuk membuktikan dalil-dalil gugatannya, Penggugat telah mengajukan alat bukti surat P.1, P.2 dan dua orang saksi;

Menimbang, bahwa bukti P.1 dan P.2 merupakan akta otentik, telah bermeterai cukup, *bernazegelen* dan cocok dengan aslinya, isi bukti tersebut menjelaskan mengenai agama dan tempat tinggal Penggugat, sehingga sejalan dengan ketentuan Pasal 165 HIR bukti tersebut telah memenuhi syarat formal dan materiil, serta mempunyai kekuatan pembuktian yang sempurna dan mengikat (*volledig en bindende bewijskracht*);

Menimbang, bahwa berdasarkan bukti P.1 telah ternyata terbukti bahwa Penggugat bertempat tinggal di wilayah hukum Pengadilan Agama Kota Tasikmalaya, maka berdasarkan ketentuan Pasal 49 ayat (1) huruf a dan Pasal 73 ayat (1) Undang-undang Nomor 7 Tahun 1989 Tentang Peradilan Agama sebagaimana telah diubah dengan Undang-undang Nomor 3 Tahun 2006 dan perubahan kedua dengan Undang-undang Nomor 50 Tahun 2009, Pengadilan Agama Kota Tasikmalaya berwenang untuk memeriksa, memutus, dan menyelesaikan perkara ini;

Menimbang, bahwa berdasarkan bukti P.2, maka harus dinyatakan telah terbukti menurut hukum bahwa Penggugat dan Tergugat telah terikat dalam perkawinan yang sah secara Agama Islam sejak tanggal 24 Agustus 2019.

Menimbang, bahwa oleh karena Penggugat dan Tergugat masih terikat sebagai suami istri yang sah, maka Penggugat sebagai *persona standi in*

Halaman 7 dari 11 halaman, Putusan Nomor 2331/Pdt.G/2020/PA.Tmk

### Disclaimer

Kepaniteraan Mahkamah Agung Republik Indonesia berusaha untuk selalu mencantumkan informasi paling kini dan akurat sebagai bentuk komitmen Mahkamah Agung untuk pelayanan publik, transparansi dan akuntabilitas pelaksanaan fungsi peradilan. Namun dalam hal-hal tertentu masih dimungkinkan terjadi permasalahan teknis terkait dengan akurasi dan keterkinian informasi yang kami sajikan, hal mana akan terus kami perbaiki dari waktu ke waktu. Dalam hal Anda menemukan inakurasi informasi yang termuat pada situs ini atau informasi yang seharusnya ada, namun belum tersedia, maka harap segera hubungi Kepaniteraan Mahkamah Agung RI melalui : Email : [kepaniteraan@mahkamahagung.go.id](mailto:kepaniteraan@mahkamahagung.go.id) Telp : 021-384 3348 (ext.318)



## Direktori Putusan Mahkamah Agung Republik Indonesia

putusan.mahkamahagung.go.id

*judicio* memiliki *legal standing* sehingga Penggugat dapat dinyatakan sebagai pihak yang mempunyai hak dan berkepentingan dalam perkara ini ;

Menimbang, bahwa sesuai dengan Pasal 22 ayat (2) Peraturan Pemerintah Nomor 9 Tahun 1975, Majelis Hakim perlu mendapatkan keterangan pihak keluarga dan atau orang-orang yang dekat dengan suami isteri itu tentang adanya perselisihan dan pertengkaran antara Penggugat dan Tergugat;

Menimbang, bahwa 2 saksi Penggugat, adalah keluarga atau orang dekat Penggugat dan atau Tergugat sesuai dengan Pasal 22 ayat (2) Peraturan Pemerintah Nomor 9 Tahun 1975 jo. Pasal 134 Kompilasi Hukum Islam dan sudah dewasa serta sudah disumpah, sehingga memenuhi syarat formal sebagaimana diatur dalam Pasal 145 HIR;

Menimbang, bahwa keterangan 2 saksi Penggugat mengenai hubungan Penggugat dan Tergugat serta mengenai keadaan rumah tangga Penggugat dan Tergugat, adalah fakta yang pernah dilihat dan didengar langsung dan relevan dengan dalil yang harus dibuktikan oleh Penggugat, oleh karena itu keterangan saksi tersebut telah memenuhi syarat materiil sebagaimana telah diatur dalam Pasal 171 HIR sehingga keterangan saksi tersebut memiliki kekuatan pembuktian dan dapat diterima sebagai alat bukti;

Menimbang, bahwa keterangan 2 saksi Penggugat bersesuaian dan cocok antara satu dengan yang lain oleh karena itu keterangan dua orang saksi tersebut memenuhi Pasal 171 dan Pasal 172 HIR;

Menimbang, bahwa berdasarkan 2 saksi Penggugat, terbukti fakta kejadian sebagai berikut:

1. Bahwa sejak pertengahan tahun 2020 antara Penggugat dan Tergugat sering terjadi perselisihan dan pertengkaran yang disebabkan Tergugat kurang dalam memberi nafkah kepada Penggugat sehingga tidak dapat memenuhi kebutuhan rumah tangganya dan Tergugat juga menjalin hubungan dengan janda yang bernama Rena;
2. Bahwa akibat perselisihan dan pertengkaran tersebut antara Penggugat dan Tergugat sudah pisah rumah sejak 2 bulan yang lalu hingga sekarang dan selama itu pula keduanya tidak pernah berkumpul lagi dan

Halaman 8 dari 11 halaman, Putusan Nomor 2331/Pdt.G/2020/PA.Tmk



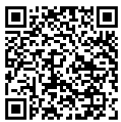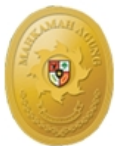

## Direktori Putusan Mahkamah Agung Republik Indonesia

putusan.mahkamahagung.go.id

tidak melaksanakan hak dan kewajibannya masing-masing sebagaimana layaknya suami isteri;

3. Bahwa, baik majelis hakim dalam persidangan, maupun pihak keluarga Penggugat dan Tergugat sudah berusaha menasehati Penggugat dan Tergugat dan sudah ada upaya musyawarah dua keluarga untuk merukunkan Penggugat dan Tergugat, akan tetapi tidak berhasil, karena Penggugat bersikukuh ingin bercerai dengan Tergugat;

Menimbang, bahwa berdasarkan fakta-fakta kejadian tersebut di atas dapat disimpulkan fakta hukum bahwa antara Penggugat dan Tergugat terus menerus terjadi perselisihan dan pertengkaran dan sudah tidak ada harapan hidup rukun lagi dalam rumah tangga;

Menimbang, bahwa berdasarkan fakta hukum di atas, maka Majelis Hakim berkesimpulan bahwa rumah tangga Penggugat dan Tergugat benar-benar sudah tidak harmonis dan sudah pecah karena telah terjadi perselisihan dan pertengkaran terus menerus yang sudah tidak mungkin lagi untuk dirukunkan dalam satu rumah tangga sehingga mempertahankan rumah tangga yang demikian tidak sejalan dengan maksud dan tujuan perkawinan sebagaimana yang dikehendaki dalam Al-Qur'an Surat Ar-Rum: 21 dan Pasal 1 Undang-Undang Nomor 1 Tahun 1974;

Menimbang, bahwa fakta hukum tersebut telah memenuhi norma hukum Islam yang terkandung dalam Kitab Fikih Sunah Juz II halaman 290 yang diambil alih menjadi pertimbangan Majelis Hakim sebagai berikut;

أَنَّ لِلزَّوْجَةِ أَنْ تَطْلُبَ مِنَ الْقَاضِيِ التَّفْرِيقَ إِذَا ادَّعَتْ إِضْرَارَ الزَّوْجِ بِهَا إِضْرَارًا لَا يَسْتَطَاعُ مَعَهُ دَوَامُ الْعِشْرَةِ بَيْنَ أُمَّثَلِهِمَا

Artinya : "bahwa istri boleh menuntut cerai kepada hakim apabila dia mengaku selalu mendapat perlakuan yang menyakitkan dari suaminya sehingga hal tersebut dapat menghalangi keberlasungan hubungan suami istri antara mereka berdua";

Menimbang, bahwa fakta hukum tersebut telah juga memenuhi salah satu alasan perceraian sebagaimana diatur dalam ketentuan Pasal 39 ayat (2)

Halaman 9 dari 11 halaman, Putusan Nomor 2331/Pdt.G/2020/PA.Tmk

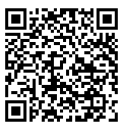

# Direktori Putusan Mahkamah Agung Republik Indonesia

putusan.mahkamahagung.go.id

Undang-Undang Nomor 1 Tahun 1974 jo. Pasal 19 huruf f Peraturan Pemerintah Nomor 9 Tahun 1975 jo. Pasal 116 huruf f Kompilasi Hukum Islam;

Menimbang, bahwa berdasarkan pertimbangan-pertimbangan tersebut di atas dan Penggugat belum pernah dijatuhi talak, maka petitum gugatan Penggugat agar Pengadilan menjatuhkan talak satu bain sughra Tergugat terhadap Penggugat tersebut telah beralasan dan tidak melawan hukum serta memenuhi Pasal 119 ayat 2 huruf (c) Kompilasi Hukum Islam, oleh karena itu patut dikabulkan;

Menimbang, bahwa karena perkara *a quo* masuk bidang perkawinan, maka berdasarkan Pasal 89 ayat (1) Undang-undang Nomor 7 Tahun 1989 Tentang Peradilan Agama sebagaimana telah diubah dengan Undang-undang Nomor 3 Tahun 2006 dan perubahan kedua dengan Undang-undang Nomor 50 Tahun 2009, biaya perkara harus dibebankan kepada Penggugat;

Mengingat semua pasal dalam peraturan perundang-undangan dan hukum Islam yang berkaitan dengan perkara ini;

## MENGADILI

1. Menyatakan Tergugat yang telah dipanggil secara resmi dan patut untuk menghadap di persidangan, tidak hadir;
2. Mengabulkan gugatan Penggugat secara verstek;
3. Menjatuhkan talak satu ba'in sughro Tergugat (TERGUGAT) terhadap Penggugat (PENGGUGAT);
4. Membebankan biaya perkara kepada Penggugat sejumlah Rp416.000,00 (empat ratus enam belas ribu rupiah);

Demikian diputuskan dalam rapat permusyawaratan Majelis Hakim yang dilangsungkan pada hari Rabu tanggal 23 Desember 2020 *Masehi*, bertepatan dengan tanggal 8 Jumadil Awwal 1442 *Hijriyah*, oleh kami Marwan Ibrahim Piinga, S.Ag. sebagai Ketua Majelis, Ahmad Mudlofar, S.H.I. dan Ahmad Mufid Bisri, S.H.I. masing-masing sebagai Hakim Anggota, putusan tersebut diucapkan dalam sidang terbuka untuk umum pada hari itu juga, oleh Ketua Majelis tersebut dengan didampingi oleh Hakim Anggota yang sama dan

Halaman 10 dari 11 halaman, Putusan Nomor 2331/Pdt.G/2020/PA.Tmk

### Disclaimer

Kepaniteraan Mahkamah Agung Republik Indonesia berusaha untuk selalu mencantumkan informasi paling kini dan akurat sebagai bentuk komitmen Mahkamah Agung untuk pelayanan publik, transparansi dan akuntabilitas pelaksanaan fungsi peradilan. Namun dalam hal-hal tertentu masih dimungkinkan terjadi permasalahan teknis terkait dengan akurasi dan keterkinian informasi yang kami sajikan, hal mana akan terus kami perbaiki dari waktu ke waktu. Dalam hal Anda menemukan inakurasi informasi yang termuat pada situs ini atau informasi yang seharusnya ada, namun belum tersedia, maka harap segera hubungi Kepaniteraan Mahkamah Agung RI melalui : Email : [kepaniteraan@mahkamahagung.go.id](mailto:kepaniteraan@mahkamahagung.go.id) Telp : 021-384 3348 (ext.318)



# Direktori Putusan Mahkamah Agung Republik Indonesia

putusan.mahkamahagung.go.id

dibantu oleh Mariya Ulfah, S.H. sebagai Panitera Pengganti serta dihadiri oleh  
Penggugat tanpa hadirnya Tergugat;

Hakim Anggota

Ketua Majelis

ttd

ttd

Ahmad Mudlofar, S.H.I.

Marwan Ibrahim Piinga, S.Ag.

Hakim Anggota

ttd

Ahmad Mufid Bisri, S.H.I.

Panitera Pengganti

ttd

Mariya Ulfah, S.H.

## Perincian Biaya:

|                    |   |     |            |
|--------------------|---|-----|------------|
| 1. Pendaftaran     | : | Rp. | 30.000,00  |
| 2. Proses          | : | Rp. | 50.000,00  |
| 3. Panggilan       | : | Rp. | 300.000,00 |
| 4. PNBPN Panggilan | : | Rp. | 20.000,00  |
| 5. Redaksi         | : | Rp. | 10.000,00  |
| 6. Meterai         | : | Rp. | 6.000,00   |

Jumlah Rp. 416.000,00

(empat ratus enam belas ribu rupiah)

Pemberitahuan isi  
Putusan Tanggal : .....

Untuk salinan putusan yang sama bunyinya oleh :  
Panitera Pengadilan Agama Kota Tasikmalaya,

Putusan Berkekuatan  
Hukum Tetap Tanggal : .....

**Didin Jamaludin, S.H., M.H.**

Halaman 11 dari 11 halaman, Putusan Nomor 2331/Pdt.G/2020/PA.Tmk
