# Supplementary material for: Classification of divorce causes during the COVID-19 pandemic using convolutional neural networks
Source: PeerJ journal article supplement (doi:10.7717/peerj-cs.998), 2022-06-30
Supplement: Kelalaian_Dataset.zip [file Kelalaian_Dataset.zip]

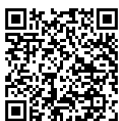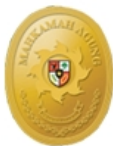

**PUTUSAN**

Nomor 1267/Pdt.G/2020/PA.Amb

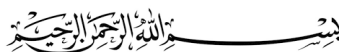

**DEMI KEADILAN BERDASARKAN KETUHANAN YANG MAHA ESA**

Pengadilan Agama Ambarawa yang memeriksa dan mengadili perkara tertentu pada tingkat pertama dalam sidang, Hakim telah menjatuhkan putusan perkara Gugatan Perceraian antara;

[REDACTED], umur 29 tahun, agama Islam,  
Pekerjaan Swasta, Pendidikan Strata I, tempat  
kediaman di [REDACTED]  
[REDACTED] Kabupaten Semarang,  
sebagai Penggugat

Melawan

[REDACTED] umur 40 tahun, agama Islam,  
Pekerjaan Swasta, Pendidikan Diploma I, tempat  
kediaman di [REDACTED]  
[REDACTED]  
[REDACTED] Kabupaten Sleman, D.I.Yogyakarta,  
sebagai Tergugat

Pengadilan Agama tersebut;

Telah mempelajari surat-surat yang berkaitan dengan perkara ini;

Telah mendengar keterangan Penggugat dan para saksi di muka sidang;

**DUDUK PERKARA**

Bahwa, Penggugat dalam surat gugatannya tanggal 23 November 2020 telah mengajukan gugatan perceraian yang telah didaftar di Kepaniteraan Pengadilan Agama Ambarawa dengan Nomor 1267/Pdt.G/2020/PA.Amb, tanggal 23 November 2020, dengan dalil-dalil sebagai berikut:

Adapun dalil-dalil gugatan Penggugat adalah sebagai berikut;

1. Bahwa pada hari Jumat, tanggal 25 Oktober 2019, telah berlangsung pernikahan antara Penggugat dan Tergugat, dihadapan pejabat PPN KUA kecamatan Depok Kabupaten Sleman kota Yogyakarta

Hal 1 dari 10 hal Put. No 1267/Pdt.G/2020/PA.Amb

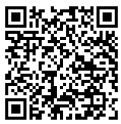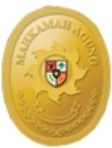

# Direktori Putusan Mahkamah Agung Republik Indonesia

putusan.mahkamahagung.go.id

dengan Nomor: [REDACTED];

2. Bahwa akibat dari perselisihan dan pertengkaran terus menerus setelah menikah, akhirnya pada 8 Agustus 2020 Penggugat dan Tergugat telah berpisah tempat tinggal dan tanpa ada nafkah lahir bathin, yang mana dalam pisah rumah tersebut saat ini Penggugat bertempat tinggal di [REDACTED]

[REDACTED] Kabupaten Semarang, dan Tergugat bertempat tinggal di [REDACTED]

[REDACTED] Kabupaten Sleman, D.I.Yogyakarta;

3. Bahwa Tergugat selama 3 bulan lebih, tidak pernah memberikan nafkah terhadap Penggugat dan anak-anak;

4. Tergugat tidak terlalu memperhatikan anak-anak dan keluarga;

Berdasarkan alasan-alasan tersebut di atas, Penggugat mohon kepada Ketua Pengadilan Ambarawa/ Majelis Hakim untuk menjatuhkan putusan yang amarnya berbunyi sebagai berikut :

## PRIMAIR:

1. Mengabulkan gugatan Penggugat seluruhnya;

2. Menjatuhkan talak satu bain sughraa Tergugat ([REDACTED])

[REDACTED] terhadap Penggugat ([REDACTED])

[REDACTED];

## SUBSIDAIR:

Atau apabila pengadilan berpendapat lain, mohon putusan yang seadil-adilnya (ex aequo et bono);

Bahwa, pada hari sidang yang telah ditetapkan Penggugat telah datang menghadap ke muka sidang, sedangkan Tergugat tidak datang menghadap ke muka sidang dan tidak menyuruh orang lain untuk menghadap sebagai wakil/kuasa hukumnya meskipun telah dipanggil secara resmi dan patut yang relaas panggilannya telah dibacakan di dalam sidang, sedangkan tidak ternyata bahwa tidak datangnya itu disebabkan suatu halangan yang sah;

Bahwa, Hakim telah menasehati Penggugat agar berpikir untuk tidak bercerai dengan Tergugat, tetapi Penggugat tetap pada dalil-dalil gugatannya untuk bercerai dengan Tergugat;

Hal 2 dari 10 hal Put. No 1267/Pdt.G/2020/PA.Amb

### Disclaimer

Kepaniteraan Mahkamah Agung Republik Indonesia berusaha untuk selalu mencantumkan informasi paling kini dan akurat sebagai bentuk komitmen Mahkamah Agung untuk pelayanan publik, transparansi dan akuntabilitas pelaksanaan fungsi peradilan. Namun dalam hal-hal tertentu masih dimungkinkan terjadi permasalahan teknis terkait dengan akurasi dan keterkinian informasi yang kami sajikan, hal mana akan terus kami perbaiki dari waktu ke waktu. Dalam hal Anda menemukan inakurasi informasi yang termuat pada situs ini atau informasi yang seharusnya ada, namun belum tersedia, maka harap segera hubungi Kepaniteraan Mahkamah Agung RI melalui : Email : kepaniteraan@mahkamahagung.go.id Telp : 021-384 3348 (ext.318)



## Direktori Putusan Mahkamah Agung Republik Indonesia

putusan.mahkamahagung.go.id

Bahwa, perkara ini tidak dapat di mediasi karena Tergugat tidak pernah datang menghadap meskipun telah dipanggil secara resmi dan patut, selanjutnya dimulai pemeriksaan dengan membacakan surat gugatan Penggugat yang maksud dan isinya tetap dipertahankan oleh Penggugat;

Bahwa, untuk menguatkan dalil-dalil gugatannya, Penggugat telah mengajukan bukti-bukti berupa :

A. Surat :

1. Fotokopi Kartu Tanda Penduduk Nomor [REDACTED] tanggal 31-08-2020, yang bermeterai cukup dan telah sesuai dengan aslinya (Bukti P.1);
2. Fotokopi Buku Kutipan Akta Nikah dari KUA kecamatan Depok Kabupaten Sleman kota Yogyakarta Nomor [REDACTED] tanggal 25 Oktober 2019, yang bermeterai cukup dan telah sesuai dengan aslinya (Bukti P.2);

B. Saksi :

1. [REDACTED], umur 43 tahun, Agama Katolik, Pendidikan Sekolah Lanjutan Tingkat Atas, Pekerjaan Karyawan Swasta, tempat tinggal [REDACTED] Kabupaten Semarang, menerangkan dibawah sumpah yang pada pokoknya :
  - Bahwa saksi kenal dengan Penggugat dan Tergugat karena sebagai kakak angkat Penggugat;
  - Bahwa Penggugat dan Tergugat menikah pada tahun 2019;
  - Bahwa Penggugat dan Tergugat telah dikaruniai anak;
  - Bahwa setelah menikah Penggugat dan Tergugat hidup bersama dan tinggal bersama di rumah orangtua Penggugat;
  - Bahwa sepengetahuan saksi, rumah tangga Penggugat dan Tergugat pada awalnya harmonis namun sejak awal pernikahan sering terjadi pertengkaran;
  - Bahwa saksi pernah mendengar sendiri Penggugat dan Tergugat bertengkar karena Tergugat tidak pernah memberikan nafkah kepada Penggugat dan anak;

Hal 3 dari 10 hal Put. No 1267/Pdt.G/2020/PA.Amb



# Direktori Putusan Mahkamah Agung Republik Indonesia

putusan.mahkamahagung.go.id

- Bahwa sekarang Penggugat dan Tergugat sudah pisah rumah;
- Bahwa sepengetahuan saksi pada bulan Agustus tahun 2020 Tergugat pergi meninggalkan Penggugat;
- Bahwa saksi menyatakan sudah tidak ada yang akan disampaikan;
- Bahwa saksi pernah mendamaikan Penggugat dan Tergugat namun tidak berhasil;

Selanjutnya untuk singkatnya uraian putusan ini, maka semua hal yang termuat dalam Berita Acara Sidang ini merupakan bagian yang tak terpisahkan dari putusan ini;

## PERTIMBANGAN HUKUM

Menimbang, bahwa maksud dan tujuan gugatan Penggugat adalah sebagaimana terurai di atas;

Menimbang, bahwa berdasarkan bukti P.2, maka harus dinyatakan telah terbukti menurut hukum bahwa Penggugat dan Tergugat telah terikat dalam perkawinan yang sah sejak tanggal 25 Oktober 2019.

Menimbang, bahwa oleh karena Penggugat dan Tergugat masih terikat sebagai suami istri yang sah, maka Penggugat sebagai *persona standi in judicio* memiliki *legal standing* sehingga Penggugat dapat dinyatakan sebagai pihak yang mempunyai hak dan berkepentingan dalam perkara ini ;

Menimbang, bahwa atas keterangan Penggugat dalam surat gugatannya bahwa Penggugat dan Tergugat beragama Islam dan telah melakukan perkawinan secara islami, maka perkara ini merupakan kompetensi absolut Pengadilan Agama untuk memeriksa dan menyelesaikannya (vide Pasal 2 jo Pasal 49 ayat (1) Undang-undang Nomor 7 Tahun 1989 Tentang Peradilan Agama sebagai mana yang telah diubah yang kedua dengan Undang-undang Nomor 50 Tahun 2009) ;

Menimbang, bahwa berdasarkan surat gugatan dan bukti P.1, Penggugat bertempat tinggal wilayah yurisdiksi Pengadilan Agama Ambarawa, maka perkara ini secara relatif juga merupakan kompetensi Pengadilan Agama Ambarawa untuk memeriksanya (vide Pasal 73 Undang-undang Nomor 7 Tahun 1989 Tentang Peradilan Agama sebagai mana yang telah diubah yang kedua dengan Undang-undang Nomor 50 Tahun 2009) jo Pasal 132 Kompilasi

Hal 4 dari 10 hal Put. No 1267/Pdt.G/2020/PA.Amb

### Disclaimer

Kepaniteraan Mahkamah Agung Republik Indonesia berusaha untuk selalu mencantumkan informasi paling kini dan akurat sebagai bentuk komitmen Mahkamah Agung untuk pelayanan publik, transparansi dan akuntabilitas pelaksanaan fungsi peradilan. Namun dalam hal-hal tertentu masih dimungkinkan terjadi permasalahan teknis terkait dengan akurasi dan keterkinian informasi yang kami sajikan, hal mana akan terus kami perbaiki dari waktu ke waktu. Dalam hal Anda menemukan inakurasi informasi yang termuat pada situs ini atau informasi yang seharusnya ada, namun belum tersedia, maka harap segera hubungi Kepaniteraan Mahkamah Agung RI melalui : Email : kepaniteraan@mahkamahagung.go.id Telp : 021-384 3348 (ext.318)



# Direktori Putusan Mahkamah Agung Republik Indonesia

putusan.mahkamahagung.go.id

Hukum Islam) ;

Menimbang, bahwa Hakim telah berupaya mendamaikan pihak Penggugat agar rukun kembali dengan Tergugat, sebagaimana dikehendaki oleh ketentuan Pasal 130 HIR jo Pasal 82 Undang-undang Nomor 7 Tahun 1989 Tentang Peradilan Agama sebagaimana yang telah diubah terakhir dengan Undang-undang Nomor 50 Tahun 2009 jo Pasal 39 ayat (1) Undang-undang Nomor 1 Tahun 1974 jo Pasal 31 ayat (2) Peraturan Pemerintah Nomor 9 Tahun 1975 jo Pasal 143 Kompilasi Hukum Islam, tetapi tidak berhasil ;

Menimbang, bahwa ternyata Tergugat meskipun dipanggil secara resmi dan patut, tidak datang menghadap di muka sidang dan pula tidak ternyata bahwa tidak datangnya itu disebabkan suatu halangan yang sah. Oleh karena itu, Tergugat harus dinyatakan tidak hadir dan gugatan tersebut harus diperiksa secara verstek. Sebagaimana ketentuan Pasal 125 ayat (1) HIR dan dalil syar'i :

من دعي إلى حاكم من حكام المسلمين فلم يجب فهو ظالم لا حق له

Artinya : " Seseorang yang dipanggil Hakim (Pengadilan) tidak datang, ia dipandang sebagai dhalim dan tidak ada hak baginya. " (Ahkamul Qur-an II : 405) ;

Menimbang, bahwa dalam perkara ini Hakim tidak menempuh prosedur mediasi karena salah satu pihak (Tergugat) tidak hadir sehingga tidak dapat dilakukan perundingan, dimana Pasal 1 ayat (1) Peraturan Mahkamah Agung R.I. Nomor 1 Tahun 2016 tentang Prosedur Mediasi di Pengadilan menyatakan, bahwa mediasi adalah cara penyelesaian sengketa melalui proses perundingan untuk memperoleh kesepakatan para pihak dengan dibantu oleh mediator. Perundingan dapat terlaksana apabila kedua belah pihak hadir ;

Menimbang, bahwa berdasarkan ketentuan Surat Edaran Mahkamah Agung RI Nomor 3 Tahun 2015 huruf C angka 3 yaitu putusan yang dijatuhkan tanpa hadirnya Tergugat dapat dikabulkan sepanjang berdasarkan hukum dan beralasan, oleh karena itu Hakim membebani Penggugat untuk membuktikan dalil-dalil gugatannya;

Menimbang, bahwa untuk membuktikan dalil-dalil gugatannya, Penggugat telah mengajukan alat bukti surat serta 2 orang saksi;

Hal 5 dari 10 hal Put. No 1267/Pdt.G/2020/PA.Amb



# Direktori Putusan Mahkamah Agung Republik Indonesia

putusan.mahkamahagung.go.id

Menimbang, bahwa alat bukti surat secara prosedural memenuhi syarat pengajuan bukti tertulis, berupa fotokopi yang telah di nazegeben cukup dan setelah dicocokkan dengan aslinya ternyata sesuai, maka berdasarkan ketentuan Pasal 1888 KUH Perdata jo. 165 ayat (1) *HetHerziene Indonesisch Reglement* (HIR) jo. Pasal 2 ayat (1) huruf (a), ayat (2), dan ayat (3), Pasal 10, dan Pasal 11 ayat (1) huruf (a) Undang-undang Republik Indonesia Nomor 13 Tahun 1985 tentang Bea Meterai jo. Pasal 1 huruf (a) dan huruf (f), serta Pasal 2 ayat (1) Peraturan Pemerintah Republik Indonesia Nomor 24 Tahun 2000 tentang Perubahan Tarif Bea Meterai dan Besarnya Batas Pengenaan Harga Nominal yang Dikenakan Bea Meterai, alat bukti surat tersebut secara formil telah memenuhi syarat sebagai alat bukti dan selanjutnya akan dipertimbangkan;

Menimbang, bahwa perkara ini termasuk sengketa di bidang perkawinan, dan berdasarkan Bukti P-1 Penggugat berdomisili di wilayah hukum Pengadilan Agama Ambarawa, maka berdasarkan ketentuan Pasal 49 ayat (1) huruf (a) dan Pasal 73 ayat (1) Undang-undang Nomor 7 Tahun 1989 Tentang Peradilan Agama sebagaimana telah diubah dengan Undang-undang Nomor 3 Tahun 2006 dan perubahan kedua dengan Undang-undang Nomor 50 Tahun 2009, Pengadilan Agama Ambarawa berwenang untuk memeriksa, memutus, dan menyelesaikan Perkara ini;

Menimbang, bahwa bukti P-2 (Fotokopi Kutipan Akta Nikah) yang merupakan akta otentik dan telah bermeterai cukup dan cocok dengan aslinya, isi bukti tersebut menjelaskan antara Penggugat dan Tergugat telah terikat dalam perkawinan yang sah, sehingga bukti tersebut telah memenuhi syarat formal dan materiil, serta mempunyai kekuatan pembuktian yang sempurna dan mengikat;

Menimbang, bahwa saksi 1 Penggugat, sudah dewasa dan sudah bersumpah, sehingga memenuhi syarat formal sebagaimana diatur dalam Pasal 145 ayat (1) angka (3e) HIR;

Menimbang, bahwa keterangan saksi 1 Penggugat mengenai dalil gugatan angka 3 dan 4, adalah fakta yang dilihat/didengar/dialami sendiri dan relevan dengan dalil yang harus dibuktikan oleh Penggugat, oleh karena itu

Hal 6 dari 10 hal Put. No 1267/Pdt.G/2020/PA.Amb

#### Disclaimer

Kepaniteraan Mahkamah Agung Republik Indonesia berusaha untuk selalu mencantumkan informasi paling kini dan akurat sebagai bentuk komitmen Mahkamah Agung untuk pelayanan publik, transparansi dan akuntabilitas pelaksanaan fungsi peradilan. Namun dalam hal-hal tertentu masih dimungkinkan terjadi permasalahan teknis terkait dengan akurasi dan keterkinian informasi yang kami sajikan, hal mana akan terus kami perbaiki dari waktu ke waktu. Dalam hal Anda menemukan inakurasi informasi yang termuat pada situs ini atau informasi yang seharusnya ada, namun belum tersedia, maka harap segera hubungi Kepaniteraan Mahkamah Agung RI melalui : Email : [kepaniteraan@mahkamahagung.go.id](mailto:kepaniteraan@mahkamahagung.go.id) Telp : 021-384 3348 (ext.318)





# Direktori Putusan Mahkamah Agung Republik Indonesia

putusan.mahkamahagung.go.id

keterangan saksi tersebut telah memenuhi syarat materiil sebagaimana telah diatur dalam Pasal 171 HIR, sehingga keterangan saksi tersebut memiliki kekuatan pembuktian dan dapat diterima sebagai alat bukti;

Menimbang, bahwa saksi 2 Penggugat, sudah dewasa dan sudah bersumpah, sehingga memenuhi syarat formal sebagaimana diatur dalam Pasal 145 ayat (1) angka (3e) HIR;

Menimbang, bahwa keterangan saksi 2 Penggugat mengenai dalil gugatan angka 3 dan 4, adalah fakta yang dilihat/didengar/dialami sendiri dan relevan dengan dalil yang harus dibuktikan oleh Penggugat, oleh karena itu keterangan saksi tersebut telah memenuhi syarat materiil sebagaimana telah diatur dalam Pasal 171 HIR, sehingga keterangan saksi tersebut memiliki kekuatan pembuktian dan dapat diterima sebagai alat bukti;

Menimbang, bahwa keterangan saksi 1 dan saksi 2 Penggugat bersesuaian dan cocok antara satu dengan yang lain oleh karena itu keterangan dua orang saksi tersebut memenuhi Pasal 171 dan Pasal 172 HIR;

Menimbang, bahwa berdasarkan saksi 1 dan saksi 2, terbukti fakta kejadian sebagai berikut;

1. Antara Penggugat dan Tergugat terus menerus terjadi perselisihan dan pertengkaran disebabkan karena Tergugat tidak memberikan nafkah kepada Penggugat;
2. Penggugat dan Tergugat pisah rumah selama 4 bulan;

Menimbang, bahwa berdasarkan fakta-fakta tersebut di atas dapat disimpulkan fakta hukum sebagai berikut;

1. Antara Penggugat dan Tergugat terus menerus terjadi perselisihan dan pertengkaran yang sulit untuk didamaikan;
2. Penggugat dan Tergugat telah pisah rumah;
3. Antara Penggugat dan Tergugat tidak ada harapan hidup rukun kembali;

Menimbang, bahwa fakta hukum tersebut telah memenuhi norma hukum Islam yang terkandung dalam Kitab Fikih Sunah Juz II halaman 290;

أَنَّ لِلزَّوْجَةِ أَنْ تَطْلُبَ مِنَ الْقَاضِيِ التَّفْرِيقَ إِذَا ادَّعَتْ إِضْرَارَ الزَّوْجِ بِهَا إِضْرَارًا لَا يَسْتَطَاعُ مَعَهُ دَوَامُ الْعِشْرَةِ بَيْنَ أَمْثَالِهَا

Hal 7 dari 10 hal Put. No 1267/Pdt.G/2020/PA.Amb

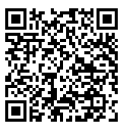

## Direktori Putusan Mahkamah Agung Republik Indonesia

putusan.mahkamahagung.go.id

Artinya : *“bahwa istri boleh menuntut talak kepada hakim apabila dia mengaku selalu mendapat perlakuan yang menyakitkan dari suaminya sehingga hal tersebut dapat menghalangi keberlasungan hubungan suami istri antara mereka berdua”;*

Menimbang, bahwa fakta hukum tersebut telah juga memenuhi Pasal 39 ayat 2 Undang-undang Nomor 1 tahun 1974 dan Pasal 19 huruf (f) Peraturan Pemerintah Nomor 9 Tahun 1975 jo. Pasal 116 huruf (f) Kompilasi Hukum Islam, oleh karena itu dapat dikabulkan;

Menimbang, bahwa berdasarkan ketentuan Pasal 84 ayat (1) dan (2) Undang-undang No. 7 tahun 1989 sebagaimana telah diubah dengan Undang-undang No. 3 tahun 2006 Jo Undang-undang No. 50 tahun 2009, maka diperintahkan kepada Panitera Pengadilan Agama Ambarawa untuk mengirimkan salinan putusan ini setelah mempunyai kekuatan hukum tetap kepada Pegawai Pencatat Nikah di wilayah tempat tinggal Penggugat dan Tergugat serta kepada Pegawai Pencatat Nikah ditempat perkawinan Penggugat dengan Tergugat dilaksanakan untuk dicatat dalam daftar yang disediakan untuk itu;

Menimbang, bahwa oleh karena perkara ini termasuk sengketa bidang perkawinan, maka sesuai Pasal 89 ayat 1 Undang-undang Republik Indonesia Nomor 7 Tahun 1989 yang telah diubah dengan Undang-undang Republik Indonesia Nomor 3 Tahun 2006 jo. Undang-undang Republik Indonesia Nomor 50 Tahun 2009 tentang Perubahan Kedua Atas Undang-undang Republik Indonesia Nomor 7 Tahun 1989 tentang Peradilan Agama jo. Peraturan Pemerintah Republik Indonesia Nomor 5 Tahun 2019 tentang Jenis dan Tarif Atas Jenis Penerimaan Negara Bukan Pajak yang Berlaku pada Mahkamah Agung dan Badan Peradilan yang Berada di Bawahnya jo. Keputusan Ketua Mahkamah Agung Republik Indonesia Nomor 57/MA/SK/III/2019 tentang Biaya Proses Penyelesaian Perkara dan Pengelolaannya pada Mahkamah Agung dan Badan Peradilan yang Berada di Bawahnya, semua biaya perkara yang timbul dalam perkara ini dibebankan kepada Penggugat yang jumlahnya sebagaimana tersebut dalam amar putusan ini;

Mengingat semua pasal dalam peraturan perundang-undangan dan

Hal 8 dari 10 hal Put. No 1267/Pdt.G/2020/PA.Amb





# Direktori Putusan Mahkamah Agung Republik Indonesia

putusan.mahkamahagung.go.id

hukum Islam yang berkaitan dengan perkara ini;

## MENGADILI

1. Menyatakan Tergugat yang telah dipanggil secara resmi dan patut untuk menghadap dipersidangan, tidak hadir;
2. Mengabulkan gugatan Penggugat dengan verstek;
3. Menjatuhkan talak satu ba'in sughro Tergugat ([REDACTED]) terhadap Penggugat ([REDACTED]);
4. Membebaskan Penggugat untuk membayar biaya perkara;

Demikian putusan ini dijatuhkan dan diucapkan pada hari Senin tanggal 28 Desember 2020 *Masehi*. bertepatan dengan tanggal 13 Jumadil Awwal 1442 *Hijriyah*. Oleh kami Siti Khoiriyah, S.H.I., M.H. sebagai Hakim Tunggal, dan putusan tersebut diucapkan dalam sidang terbuka untuk umum, dibantu oleh Ahmad Roikhan, S.Sy., S.H. sebagai Panitera Pengganti serta dihadiri Penggugat tanpa hadirnya Tergugat;

Hakim,

**Siti Khoiriyah, S.H.I., M.H.**  
Panitera Pengganti,

**Ahmad Roikhan, S.Sy., S.H.**

### Perincian Biaya :

|                   |      |      |
|-------------------|------|------|
| Biaya Pendaftaran | : Rp | 0,00 |
| Biaya Proses      | : Rp | 0,00 |
| Biaya Pemanggilan | : Rp | 0,00 |
| Biaya Redaksi     | : Rp | 0,00 |
| Biaya Materai     | : Rp | 0,00 |
| Jumlah            | : Rp | 0,00 |

Hal 9 dari 10 hal Put. No 1267/Pdt.G/2020/PA.Amb

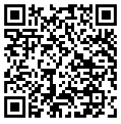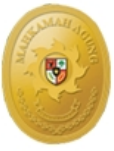

**Direktori Putusan Mahkamah Agung Republik Indonesia**  
putusan.mahkamahagung.go.id

Hal 10 dari 10 hal Put. No 1267/Pdt.G/2020/PA.Amb

**Disclaimer**

Kepaniteraan Mahkamah Agung Republik Indonesia berusaha untuk selalu mencantumkan informasi paling kini dan akurat sebagai bentuk komitmen Mahkamah Agung untuk pelayanan publik, transparansi dan akuntabilitas pelaksanaan fungsi peradilan. Namun dalam hal-hal tertentu masih dimungkinkan terjadi permasalahan teknis terkait dengan akurasi dan keterkinian informasi yang kami sajikan, hal mana akan terus kami perbaiki dari waktu ke waktu. Dalam hal Anda menemukan inakurasi informasi yang termuat pada situs ini atau informasi yang seharusnya ada, namun belum tersedia, maka harap segera hubungi Kepaniteraan Mahkamah Agung RI melalui :  
Email : kepaniteraan@mahkamahagung.go.id Telp : 021-384 3348 (ext.318)
