# Supplementary material for: Classification of divorce causes during the COVID-19 pandemic using convolutional neural networks
Source: PeerJ journal article supplement (doi:10.7717/peerj-cs.998), 2022-06-30
Supplement: Kelalaian_Dataset.zip [file Kelalaian_Dataset.zip]

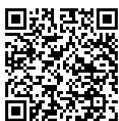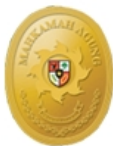

## **PUTUSAN**

Nomor 4102/Pdt.G/2020/PA.Smdg

بِسْمِ اللَّهِ الرَّحْمَنِ الرَّحِيمِ

### **DEMI KEADILAN BERDASARKAN KETUHANAN YANG MAHA ESA**

Pengadilan Agama Sumedang yang memeriksa dan mengadili perkara tertentu pada tingkat pertama dalam sidang majelis hakim telah menjatuhkan putusan dalam perkara Cerai Gugat antara :

Winda Nuranti Binti Yoyon, tempat dan tanggal lahir Sumedang, 31 Maret 1990, agama Islam, pekerjaan Mengurus Rumah Tangga, Pendidikan Sekolah Lanjutan Tingkat Atas, tempat kediaman di Dusun Mekarwangi, Rt. 02 / Rw. 07., Desa Jatimekar, Situraja, Kab. Sumedang, Jawa Barat dalam hal ini memberikan kuasa kepada H. Dadang Heriyadi, S.H., Erwin Sudrajat, S.H., Opik Rahmat, S.H., Advokat yang berkantor di Lembaga Bantuan Dan Konsultasi Hukum (jaya Persada) Yang Beralamat Di Jalan Cipadung No.12 Kelurahan Kotakaler, Kecamatan Sumedang Utara, Kabupaten Sumedang berdasarkan surat kuasa khusus tanggal sebagai Penggugat;

melawan

Mohamad Rian Prahasta Bin Sunggana, tempat dan tanggal lahir Sumedang, 07 Mei 1984, agama Islam, pekerjaan Karyawan Swasta, Pendidikan Sekolah Lanjutan Tingkat Atas, tempat kediaman di Dusun Mekarwangi, Rt. 02 / Rw. 07., Desa Jatimekar, Situraja, Kab. Sumedang, Jawa Barat sebagai Tergugat;

Pengadilan Agama tersebut;

Telah mempelajari surat-surat yang berkaitan dengan perkara ini;

Halaman 1 dari 11 putusan Nomor 4102/Pdt.G/2020/PA.Smdg

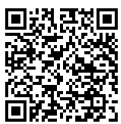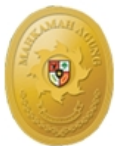

# Direktori Putusan Mahkamah Agung Republik Indonesia

putusan.mahkamahagung.go.id

Telah mendengar keterangan Penggugat dan para saksi di muka sidang;

## DUDUK PERKARA

Bahwa Penggugat dalam surat gugatan tanggal 27 November 2020 telah mengajukan permohonan Cerai Gugat, yang telah terdaftar di Kepaniteraan Pengadilan Agama Sumedang, dengan Nomor 4102/Pdt.G/2020/PA.Smdg, tanggal 27 November 2020, dengan dalil-dalil pada pokoknya sebagai berikut:

1. Bahwa antara Penggugat dengan Tergugat adalah pasangan suami istri sah, yang menikah pada tanggal 29 Januari 2011 di Kantor Urusan Agama Kecamatan Wado, Kabupaten Sumedang, sebagaimana tercatat dalam Kutipan Akta Nikah Nomor 11/11/I/2011;
2. Bahwa setelah menikah Penggugat dan Tergugat tinggal di kediaman bersama di Dusun Mekarwangi, RT 02 / RW 07, Desa Jatimekar, Kecamatan Situraja, Kabupaten Sumedang;
3. Bahwa perkawinan antara Penggugat dengan Tergugat telah dikaruniai 3 (tiga) orang anak;
4. Bahwa rumah tangga yang pada awalnya diharapkan berjalan harmonis, namun hal tersebut tidak terwujud dikarenakan sejak akhir tahun 2017 mulai terjadi pertengkaran dan perselisihan yang terus menerus antara Penggugat dengan Tergugat dan penyebabnya adalah Tergugat yang seringkali tidak memperlihatkan keterbukaan pemberian nafkah kepada Penggugat, dan pemberian nafkah dari Tergugat tersebut dinilai sangat kurang. Seringkali diingatkan oleh Penggugat, akan tetapi Tergugat tidak memperlihatkan perubahan sikap menjadi lebih baik;
5. Bahwa puncaknya sejak bulan Maret 2018, dikarenakan Tergugat tidak memperlihatkan perubahan yang lebih baik pada kondisi rumah tangganya, maka antara Penggugat dengan Tergugat sudah tidak lagi melakukan hubungan suami isteri dan Tergugat pergi meninggalkan Penggugat;
6. Bahwa telah diupayakan mendamaikan Penggugat dengan Tergugat, baik oleh keluarga pihak Penggugat maupun keluarga pihak Tergugat, akan tetapi tidak pernah tercapai, sehingga tidak ada jalan terbaik untuk menyelesaikan permasalahan ini kecuali perceraian;

Halaman 2 dari 11 putusan Nomor 4102/Pdt.G/2020/PA.Smdg

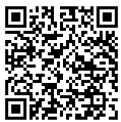

## Direktori Putusan Mahkamah Agung Republik Indonesia

putusan.mahkamahagung.go.id

7. Bahwa atas dasar hal-hal tersebut diatas dengan ini Penggugat mengajukan gugatan cerai terhadap Tergugat dengan alasan salah satu pihak meninggalkan pihak lain selama 2 (dua) tahun berturut-turut tanpa izin pihak lain dan tanpa alasan yang sah atau karena hal lain diluar kemampuannya, sebagaimana tersebut dalam Pasal 19 huruf (b) Peraturan Pemerintah No. 9 Tahun 1975 jo. Pasal 116 huruf (b) Kompilasi Hukum Islam;

Bahwa berdasarkan dalil-dalil tersebut, Penggugat memohon kepada Pengadilan Agama Sumedang, agar menjatuhkan putusan yang amarnya sebagai berikut:

1. Mengabulkan gugatan Penggugat;
2. Menjatuhkan talak satu ba'in sughra dari Tergugat (**Mohamad Rian Prahasta bin Sunggana**) terhadap Penggugat (**Winda Nuranti binti Yoyon**);
3. Menetapkan biaya perkara menurut hukum;

Bahwa pada persidangan yang telah ditetapkan Penggugat telah datang menghadap di persidangan, sedangkan Tergugat tidak datang menghadap di persidangan dan tidak menyuruh orang lain untuk menghadap sebagai wakil/kuasanya yang sah, meskipun berdasarkan surat panggilan (relaas) yang dibacakan di persidangan, Tergugat telah dipanggil secara resmi dan patut, sedangkan tidak ternyata bahwa tidak datangnya Tergugat tersebut disebabkan oleh suatu alasan yang sah;

Bahwa majelis hakim telah menasehati Penggugat agar berpikir untuk tidak bercerai dengan Tergugat, tetapi Penggugat tetap pada dalil-dalil Penggugatannya untuk bercerai dengan Tergugat;

Bahwa perkara ini tidak dapat dimediasi karena Tergugat tidak pernah datang menghadap meskipun telah dipanggil secara resmi dan patut, selanjutnya dimulai pemeriksaan dengan membacakan surat Penggugatan Penggugat yang maksud dan tujuannya tetap dipertahankan oleh Penggugat;

Halaman 3 dari 11 putusan Nomor 4102/Pdt.G/2020/PA.Smdg

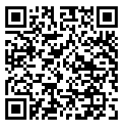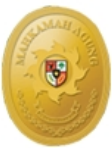

# Direktori Putusan Mahkamah Agung Republik Indonesia

putusan.mahkamahagung.go.id

Bahwa untuk menguatkan dalil-dalil Penggugatannya, Penggugat telah mengajukan bukti berupa :

## A. Surat :

Fotocopy Kutipan Akta Nikah Nomor : 11/11/I/2011, tertanggal 29 Januari 2011 yang dikeluarkan oleh Kantor Urusan Agama Kecamatan Wado, Kabupaten Sumedang, telah bermeterai cukup dan dicocokkan dengan aslinya, kemudian diberi tanda alat bukti (P) ;

## B. Saksi :

1. Cuncun bin Ating, umur 30 tahun, agama Islam, pekerjaan wiraswasta, tempat kediaman di Dusun Mekarwangi, Rt. 02 / Rw. 07., Desa Jatimekar, Situraja, Kab. Sumedang, di bawah sumpahnya memberikan keterangan sebagai berikut :
  - Bahwa saksi kenal kepada Penggugat dan Tergugat karena saksi sebagai saudra sepupu Penggugat;
  - Bahwa saksi mengetahui Penggugat dan Tergugat setelah menikah bertempat tinggal bersama terakhir tinggal bersama di Dusun Mekarwangi, RT 02 / RW 07, Desa Jatimekar, Kecamatan Situraja, Kabupaten Sumedang ;
  - Bahwa saksi mengetahui rumah tangga Penggugat dan Tergugat semula rukun dan harmonis serta telah dikaruniai 3 (tiga) orang anak, akan tetapi sejak bulan Desember 2017 rumah tangga Penggugat dan Tergugat mulai terjadi perselisihan dan pertengkaran;
  - Bahwa saksi melihat antara Penggugat dan Tergugat telah berselisih dan bertengkar karena Tergugat diketahui menjalin hubungan istimewa dengan wanita idaman lain ;
  - Bahwa pada bulan Maret 2018 Tergugat pergi meninggalkan rumah tempat kediaman bersama sampai sekarang, sehingga sejak saat itu antara Penggugat dan Tergugat telah pisah rumah hingga sekarang;
  - Bahwa pihak keluarga Penggugat dan Tergugat telah mendamaikan dan menasehati Penggugat dan Tergugat akan tetapi tidak berhasil ;

Halaman 4 dari 11 putusan Nomor 4102/Pdt.G/2020/PA.Smdg

### Disclaimer

Kepaniteraan Mahkamah Agung Republik Indonesia berusaha untuk selalu mencantumkan informasi paling kini dan akurat sebagai bentuk komitmen Mahkamah Agung untuk pelayanan publik, transparansi dan akuntabilitas pelaksanaan fungsi peradilan. Namun dalam hal-hal tertentu masih dimungkinkan terjadi permasalahan teknis terkait dengan akurasi dan keterkinian informasi yang kami sajikan, hal mana akan terus kami perbaiki dari waktu ke waktu. Dalam hal Anda menemukan inakurasi informasi yang termuat pada situs ini atau informasi yang seharusnya ada, namun belum tersedia, maka harap segera hubungi Kepaniteraan Mahkamah Agung RI melalui : Email : [kepaniteraan@mahkamahagung.go.id](mailto:kepaniteraan@mahkamahagung.go.id) Telp : 021-384 3348 (ext.318)



## Direktori Putusan Mahkamah Agung Republik Indonesia

putusan.mahkamahagung.go.id

- Bahwa saksi sudah tidak ada kesanggupan merukunkan Penggugat dan Tergugat ;

2. Ninit binti Tarkin, umur 30 tahun, agama Islam, pekerjaan ibu rumah tangga, tempat kediaman di Dusun Mekarwangi, Rt. 02 / Rw. 07., Desa Jatimekar, Situraja, Kab. Sumedang, di bawah sumpahnya memberikan keterangan sebagai berikut :

- Bahwa saksi kenal kepada Penggugat dan Tergugat karena saksi sebagai saudara sepupu Penggugat;
- Bahwa saksi mengetahui semula rumah tangga Penggugat dan Tergugat rukun dan harmonis serta telah dikaruniai 3 (tiga) orang anak, namun sejak bulan Desember 2017 rumah tangga Penggugat dan Tergugat mulai berselisih dan bertengkar ;
- Bahwa saksi pernah mendengar antara Penggugat dan Tergugat berselisih dan bertengkar, yaitu pada bulan Desember 2017 disebabkan karena Tergugat yang seringkali tidak memperlihatkan keterbukaan pemberian nafkah kepada Penggugat ;
- Bahwa puncak pertengkar terjadi pada bulan Maret 2018 dimana Tergugat pergi meninggalkan rumah tempat kediaman bersama sampai sekarang, maka sejak saat itu antara Penggugat dan Tergugat telah pisah rumah hingga sekarang ;
- Bahwa saksi dan keluarga Penggugat dan keluarga Tergugat telah mendamaikan dan menasehati Penggugat dan Tergugat supaya rukun kembali membina rumah tangga akan tetapi tidak berhasil ;
- Bahwa saksi sudah tidak kesanggupan lagi merukunkan Penggugat dan Tergugat;

Bahwa Penggugat menyampaikan kesimpulan yang isinya sebagaimana tertuang dalam berita acara sidang;

Selanjutnya untuk singkatnya uraian putusan ini, maka semua hal yang termuat dalam berita acara sidang merupakan bagian yang tidak terpisahkan dari putusan ini ;

Halaman 5 dari 11 putusan Nomor 4102/Pdt.G/2020/PA.Smdg

#### Disclaimer

Kepaniteraan Mahkamah Agung Republik Indonesia berusaha untuk selalu mencantumkan informasi paling kini dan akurat sebagai bentuk komitmen Mahkamah Agung untuk pelayanan publik, transparansi dan akuntabilitas pelaksanaan fungsi peradilan. Namun dalam hal-hal tertentu masih dimungkinkan terjadi permasalahan teknis terkait dengan akurasi dan keterkinian informasi yang kami sajikan, hal mana akan terus kami perbaiki dari waktu ke waktu. Dalam hal Anda menemukan inakurasi informasi yang termuat pada situs ini atau informasi yang seharusnya ada, namun belum tersedia, maka harap segera hubungi Kepaniteraan Mahkamah Agung RI melalui :  
Email : kepaniteraan@mahkamahagung.go.id Telp : 021-384 3348 (ext.318)



**PERTIMBANGAN HUKUM**

Menimbang, bahwa maksud dan tujuan Penggugatan Penggugat adalah sebagaimana terurai di atas;

Menimbang, bahwa ternyata Tergugat tidak datang menghadap di persidangan dan tidak pula menyuruh orang lain untuk menghadap sebagai wakil/kuasanya yang sah, meskipun berdasarkan Surat Panggilan (relaas) yang dibacakan di persidangan, Tergugat telah dipanggil secara resmi dan patut, sedangkan tidak ternyata bahwa tidak datangnya Tergugat tersebut disebabkan oleh suatu alasan yang sah;

Menimbang, bahwa Tergugat yang dipanggil secara resmi dan patut akan tetapi tidak menghadap harus dinyatakan tidak hadir dan Penggugatan tersebut harus diperiksa secara verstek;

Menimbang, bahwa berdasarkan ketentuan Pasal 125 ayat (1) HIR/ Pasal 149 ayat (1) R.Bg, yaitu putusan yang dijatuhkan tanpa hadirnya Tergugat dapat dikabulkan sepanjang berdasarkan hukum dan beralasan, oleh karena itu majelis hakim membebani Penggugat untuk membuktikan dalil-dalil Penggugatannya;

Menimbang, bahwa untuk menguatkan perkara tersebut berdasarkan hokum dan beralasan, maka majelis membebani Penggugat untuk membuktikan dalil-dalil gugatannya ;

Menimbang, bahwa untuk membuktikan dalil permohonannya, Penggugat telah mengajukan alat bukti surat dan 2 orang saksi;

Menimbang, bahwa bukti P (Fotokopi Kutipan Akta Nikah) yang merupakan akta otentik dan telah bermeterai cukup dan cocok dengan aslinya, isi bukti tersebut menjelaskan mengenai hubungan suami isteri antara Pemohon dengan Termohon, sehingga bukti tersebut telah memenuhi syarat formal dan materiil, serta mempunyai kekuatan pembuktian yang sempurna dan mengikat;

*Halaman 6 dari 11 putusan Nomor 4102/Pdt.G/2020/PA.Smdg*





## Direktori Putusan Mahkamah Agung Republik Indonesia

putusan.mahkamahagung.go.id

Menimbang, bahwa berdasarkan bukti P.1 tentang kompetensi absolut dalam perkara ini, Majelis Hakim menyatakan bahwa perkara ini adalah wewenang Pengadilan Agama Sumedang ;

Menimbang, bahwa saksi 1 Penggugat, sudah dewasa dan sudah bersumpah, sehingga memenuhi syarat formal sebagaimana diatur dalam Pasal 145 ayat 1 angka 3e HIR;

Menimbang, bahwa keterangan saksi 1 Penggugat mengenai pernikahan Penggugat dengan Tergugat, adalah fakta yang dilihat sendiri dan relevan dengan dalil yang harus dibuktikan oleh Penggugat, oleh karena itu keterangan saksi tersebut telah memenuhi syarat materiil sebagaimana telah diatur dalam Pasal 171 HIR. sehingga keterangan saksi tersebut memiliki kekuatan pembuktian dan dapat diterima sebagai alat bukti;

Menimbang, bahwa saksi 2 Penggugat, sudah dewasa dan sudah bersumpah, sehingga memenuhi syarat formal sebagaimana diatur dalam Pasal 145 ayat 1 angka 3e HIR;

Menimbang, bahwa keterangan saksi 2 Penggugat mengenai terjadinya pernikahan Penggugat dengan Tergugat, adalah fakta yang didengar sendiri dan relevan dengan dalil yang harus dibuktikan oleh Penggugat, oleh karena itu keterangan saksi tersebut telah memenuhi syarat materiil sebagaimana telah diatur dalam Pasal 171 HIR. sehingga keterangan saksi tersebut memiliki kekuatan pembuktian dan dapat diterima sebagai alat bukti;

Menimbang, bahwa keterangan saksi 1 dan saksi 2 Penggugat telah terbukti bahwa Penggugat dengan Tergugat telah menikah secara sah berdasarkan syariat Islam ;

Menimbang, bahwa keterangan saksi 1 Penggugat mengenai perselisihan dan pertengkarannya, adalah fakta yang dilihat sendiri dan relevan dengan dalil yang harus dibuktikan oleh Penggugat, oleh karena itu keterangan saksi tersebut telah memenuhi syarat materiil sebagaimana telah diatur dalam

Halaman 7 dari 11 putusan Nomor 4102/Pdt.G/2020/PA.Smdg



## Direktori Putusan Mahkamah Agung Republik Indonesia

putusan.mahkamahagung.go.id

Pasal 171 HIR sehingga keterangan saksi tersebut memiliki kekuatan pembuktian dan dapat diterima sebagai alat bukti;

Menimbang, bahwa keterangan saksi 2 Penggugat mengenai perselisihan dan pertengkaran, adalah fakta yang didengar sendiri dan relevan dengan dalil yang harus dibuktikan oleh Penggugat, oleh karena itu keterangan saksi tersebut telah memenuhi syarat materiil sebagaimana telah diatur dalam Pasal 171 HIR sehingga keterangan saksi tersebut memiliki kekuatan pembuktian dan dapat diterima sebagai alat bukti;

Menimbang, bahwa keterangan saksi 1 dan saksi 2 Penggugat bersesuaian dan cocok antara satu dengan yang lain oleh karena itu keterangan dua orang saksi tersebut memenuhi Pasal 171 dan Pasal 172 HIR ;

Menimbang, bahwa berdasarkan bukti P, Saksi 1 dan Saksi 2 terbukti fakta kejadian sebagai berikut:

1. Bahwa Penggugat telah menikah dengan Tergugat dan belum bercerai sampai dengan sekarang ;
2. Bahwa Penggugat dan Tergugat sering terjadi perselisihan dan pertengkaran ;
3. Bahwa perselisihan dan pertengkaran antara Penggugat dan Tergugat telah didamaikan oleh pihak keluarga dan tokoh masyarakat setempat ;
4. Bahwa antara Penggugat dan Tergugat sudah pisah rumah tempat tinggal ;

Menimbang, bahwa berdasarkan fakta-fakta tersebut di atas dapat disimpulkan fakta hukum sebagai berikut:

1. Bahwa perkara dimaksud adalah kewenangan absolut Pengadilan Agama Sumedang ;
2. Bahwa Penggugat dan Tergugat adalah suami isteri yang sah dan tidak pernah bercerai ;

Halaman 8 dari 11 putusan Nomor 4102/Pdt.G/2020/PA.Smdg

#### Disclaimer

Kepaniteraan Mahkamah Agung Republik Indonesia berusaha untuk selalu mencantumkan informasi paling kini dan akurat sebagai bentuk komitmen Mahkamah Agung untuk pelayanan publik, transparansi dan akuntabilitas pelaksanaan fungsi peradilan. Namun dalam hal-hal tertentu masih dimungkinkan terjadi permasalahan teknis terkait dengan akurasi dan keterkinian informasi yang kami sajikan, hal mana akan terus kami perbaiki dari waktu ke waktu. Dalam hal Anda menemukan inakurasi informasi yang termuat pada situs ini atau informasi yang seharusnya ada, namun belum tersedia, maka harap segera hubungi Kepaniteraan Mahkamah Agung RI melalui :  
Email : kepaniteraan@mahkamahagung.go.id Telp : 021-384 3348 (ext.318)





## Direktori Putusan Mahkamah Agung Republik Indonesia

putusan.mahkamahagung.go.id

3. Bahwa antara Penggugat dan Tergugat terus-menerus terjadi perselisihan dan pertengkaran dan tidak ada harapan akan hidup rukun lagi dalam rumah tangga ;
4. Bahwa antara Penggugat dan Tergugat telah pisah rumah;  
Menimbang, bahwa fakta hukum tersebut telah pula memenuhi doktrin hukum Islam sebagai berikut :

إذا اشتد رغبة الزوجة لزوجها طلق عليها القاضي طلاقاً

Artinya: "Disaat istri telah memuncak kebencian terhadap suaminya, maka hakim diperkenankan menjatuhkan talak (suami) nya dengan talak satu";

Menimbang, bahwa fakta hukum tersebut telah juga memenuhi Pasal 22 jo Pasal 19 huruf (f) Peraturan Pemerintah Nomor 9 Tahun 1975 jo. Pasal 19 huruf (f) Kompilasi Hukum Islam ;

Menimbang, bahwa berdasarkan pertimbangan-pertimbangan tersebut di atas dan Penggugat belum pernah cerai dengan Tergugat, maka petitum permohonan Penggugat mengenai cerai gugat tersebut memenuhi Pasal 119 Kompilasi Hukum Islam, oleh karena itu dapat dikabulkan;

Menimbang, bahwa oleh karena perkara ini masuk dalam bidang perkawinan, maka sesuai Pasal 89 ayat (1) Undang-undang Nomor 7 Tahun 1989 sebagaimana telah diubah dengan Undang-undang Nomor 3 Tahun 2006 dan perubahan kedua dengan Undang-undang Nomor 50 Tahun 2009, biaya perkara dibebankan kepada Penggugat ;

Mengingat, semua pasal dalam peraturan perundang-undangan dan hukum Islam yang berkaitan dengan perkara ini;

### MENGADILI:

1. Menyatakan Tergugat yang telah dipanggil secara resmi dan patut untuk menghadap di persidangan tidak hadir ;
2. Mengabulkan gugatan Penggugat dengan verstek ;

Halaman 9 dari 11 putusan Nomor 4102/Pdt.G/2020/PA.Smdg

#### Disclaimer

Kepaniteraan Mahkamah Agung Republik Indonesia berusaha untuk selalu mencantumkan informasi paling kini dan akurat sebagai bentuk komitmen Mahkamah Agung untuk pelayanan publik, transparansi dan akuntabilitas pelaksanaan fungsi peradilan. Namun dalam hal-hal tertentu masih dimungkinkan terjadi permasalahan teknis terkait dengan akurasi dan keterkinian informasi yang kami sajikan, hal mana akan terus kami perbaiki dari waktu ke waktu. Dalam hal Anda menemukan inakurasi informasi yang termuat pada situs ini atau informasi yang seharusnya ada, namun belum tersedia, maka harap segera hubungi Kepaniteraan Mahkamah Agung RI melalui :  
Email : kepaniteraan@mahkamahagung.go.id Telp : 021-384 3348 (ext.318)



## Direktori Putusan Mahkamah Agung Republik Indonesia

putusan.mahkamahagung.go.id

3. Menjatuhkan talak satu ba'in sughra dari Tergugat (**Mohamad Rian Prahasta bin Sunggana**) terhadap Penggugat (**Winda Nuranti binti Yoyon**);
4. Membebankan kepada Penggugat untuk membayar biaya perkara ini sejumlah Rp. 381.000,00 (tiga ratus delapan puluh satu ribu rupiah);

Demikian putusan ini dijatuhkan dalam permusyawaratan majelis yang dilaksanakan pada hari Senin tanggal 21 Desember 2020 Masehi, bertepatan dengan tanggal 06 Jumadil Awal 1442 Hijriyah, oleh Drs. Dimyati, SH, MH sebagai Ketua Majelis, dan Drs. Endang Sofwan, MH. dan Drs. Nuryadi Siswanto, MH masing-masing sebagai Hakim Anggota, putusan tersebut dibacakan dalam sidang terbuka untuk umum pada hari itu juga, oleh Ketua Majelis tersebut dengan didampingi oleh Hakim Anggota dan dibantu oleh Agus Kurnia, S. Sy sebagai Panitera Pengganti dengan dihadiri oleh Penggugat tanpa hadirnya Tergugat;

Hakim Anggota,

Ketua Majelis,

Drs. Endang Sofwan, MH

Drs. Dimyati, SH, MH

Hakim Anggota,

Drs. Nuryadi Siswanto, MH

Panitera Pengganti

Agus Kurnia, S. Sy.

Halaman 10 dari 11 putusan Nomor 4102/Pdt.G/2020/PA.Smdg



# Direktori Putusan Mahkamah Agung Republik Indonesia

putusan.mahkamahagung.go.id

## Perincian biaya :

|                |                       |
|----------------|-----------------------|
| 1. Pendaftaran | Rp. 30.000,00         |
| 2. Proses      | Rp. 75.000,00         |
| 3. Panggilan   | Rp. 240.000,00        |
| 4. PNBP        | Rp. 20.000,00         |
| 5. Redaksi     | Rp. 10.000,00         |
| 6. Meterai     | Rp. 6.000,00          |
| <b>Jumlah</b>  | <b>Rp. 381.000,00</b> |

(tiga ratus delapan puluh satu ribu rupiah )

Halaman 11 dari 11 putusan Nomor 4102/Pdt.G/2020/PA.Smdg
