# Supplementary material for: Classification of divorce causes during the COVID-19 pandemic using convolutional neural networks
Source: PeerJ journal article supplement (doi:10.7717/peerj-cs.998), 2022-06-30
Supplement: Konflik_Dataset.zip [file Konflik_Dataset.zip]

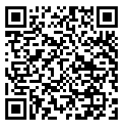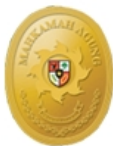

**PUTUSAN**

**Nomor** XXXX/Pdt.G/2020/PA.Dmk.

بِسْمِ اللَّهِ الرَّحْمَنِ الرَّحِيمِ

**DEMI KEADILAN BERDASARKAN KETUHANAN YANG MAHA ESA**

Pengadilan Agama Demak yang memeriksa dan mengadili perkara-perkara tertentu dalam tingkat pertama telah menjatuhkan putusan sebagai berikut dalam perkara Cerai Talak antara :

**Pemohon**, umur 26 tahun, agama Islam, pendidikan SLTA, pekerjaan Karyawan Swasta, bertempat tinggal di XXXXJakarta Barat dalam hal ini memberikan kuasa kepada : **Wuri D. Yuliastri, S.H. dan Rakiyo, S.H.**, Para Advokat yang tergabung pada Kantor Advokat & Konsultan Hukum "W.D.Y. & Partners" yang di beralamat di Jl. Bledak Kantil II No. 45 Tlogosari Kulon, Pedurungan, Kota Semarang Berdasarkan Surat Kuasa Khusus tertanggal 10 November 2020, sebagai **Pemohon**;

**Melawan**

**Termohon**, umur 31 tahun, agama Islam, pendidikan SLTA, pekerjaan Karyawan Swasta, bertempat tinggal di XXXXKabupaten Demak, sebagai **Termohon**;

Pengadilan Agama tersebut;

Telah membaca surat-surat perkara;

Telah mendengar Pemohon dan saksi-saksi;

**DUDUK PERKARA**

Bahwa Pemohon dalam surat permohonannya tertanggal 14 Nopember 2020, terdaftar di Kepaniteraan Pengadilan Agama Demak pada tanggal 18

Putusan No. 2085/Pdt.G/2020/PA. Dmk.  
Halaman 1 dari 11 halaman

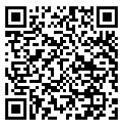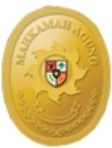

# Direktori Putusan Mahkamah Agung Republik Indonesia

putusan.mahkamahagung.go.id

Nopember 2020 Nomor XXXX/Pdt.G/2020/PA.Dmk. telah mengemukakan hal-hal sebagai berikut :

1. Bahwa Pemohon dan Termohon adalah suami istri yang menikah pada tanggal 3 September 2017, berdasarkan Kutipan Akta Nikah Nomor : 0570/27/IX/2017 tanggal 4 September 2017 yang diterbitkan oleh Kantor Urusan Agama Kecamatan Bonang, Kabupaten Demak;
2. Bahwa setelah menikah Pemohon dan Termohon tinggal bersama mengontrak di Jakarta kemudian pada bulan Juni 2018 pindah ke Demak di rumah orang tua Termohon. Tetapi sekarang Pemohon tinggal di Jakarta dan Termohon tetap di Demak;
3. Bahwa dalam perkawinan antara Pemohon dan Termohon dikaruniai seorang anak laki-laki bernama XXXX, Umur 1 tahun 10 bulan yang lahir di Demak pada tanggal 31 Desember 2018 dan saat ini tinggal bersama dengan Termohon;
4. Bahwa antara Pemohon dan Termohon hingga saat ini belum pernah bercerai;
5. Bahwa awalnya pernikahan antara Pemohon dan Termohon berjalan harmonis. Tetapi sejak sekitar akhir tahun 2018 kehidupan rumah tangga Pemohon dan Termohon sudah tidak harmonis lagi. Hal ini disebabkan karena diantara Pemohon dan Termohon selalu terjadi perselisihan dan pertengkaran terus menerus yang sudah tidak bisa didamaikan lagi yang disebabkan karena persoalan kesulitan ekonomi;
6. Bahwa puncaknya terjadi pada sekitar pertengahan bulan Juni 2019 terjadi perselisihan diantara Pemohon dan Termohon yang berujung pada pisahnya Pemohon dan Termohon hingga sekarang;
7. Bahwa upaya damai sudah dilakukan baik dari Pemohon dan Termohon sendiri maupun dari pihak keluarga, tetapi perselisihan dan pertengkaran diantara Pemohon dan Termohon terus saja terjadi dan sudah tidak bisa dirukunkan lagi;

Putusan No. 2085/Pdt.G/2020/PA. Dmk.  
Halaman 2 dari 11 halaman

#### Disclaimer

Kepaniteraan Mahkamah Agung Republik Indonesia berusaha untuk selalu mencantumkan informasi paling kini dan akurat sebagai bentuk komitmen Mahkamah Agung untuk pelayanan publik, transparansi dan akuntabilitas pelaksanaan fungsi peradilan. Namun dalam hal-hal tertentu masih dimungkinkan terjadi permasalahan teknis terkait dengan akurasi dan keterkinian informasi yang kami sajikan, hal mana akan terus kami perbaiki dari waktu ke waktu. Dalam hal Anda menemukan inakurasi informasi yang termuat pada situs ini atau informasi yang seharusnya ada, namun belum tersedia, maka harap segera hubungi Kepaniteraan Mahkamah Agung RI melalui :  
Email : [kepaniteraan@mahkamahagung.go.id](mailto:kepaniteraan@mahkamahagung.go.id) Telp : 021-384 3348 (ext.318)

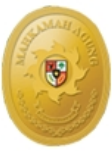

## Direktori Putusan Mahkamah Agung Republik Indonesia

putusan.mahkamahagung.go.id

8. Bahwa berdasarkan hal-hal tersebut diatas, rumah tangga Pemohon dan Termohon telah pecah dan sudah tidak dapat dipertahankan lagi, atau dengan kata lain sudah tidak ada gunanya lagi untuk dipertahankan. Demikian pula telah terjadi pisah tempat tinggal diantara Pemohon dan Termohon selama lebih dari 1 (satu) tahun. Dan sebagaimana ketentuan Pasal 39 ayat 2 UU No. 1 tahun 1974 tentang Perkawinan Jo. Pasal 19 Peraturan Pemerintah No. 9 Tahun 1975 Tentang Pelaksanaan Undang-Undang Nomor 1 Tahun 1974 Tentang Perkawinan Jo. Pasal 116 huruf f Kompilasi Hukum Islam telah cukup alasan bagi Pemohon untuk mengajukan permohonan talak ini di Pengadilan Agama Demak dan oleh karenanya beralasan untuk diterima dan dikabulkan.

Berdasarkan alasan-alasan seperti tersebut diatas, maka Pemohon meminta kepada Ketua Pengadilan Agama Demak untuk berkenan memanggil para pihak guna diajukan dalam persidangan; dan selanjutnya memberikan keputusan sebagai berikut :

- I. Menerima dan Mengabulkan Permohonan Pemohon;
- II. Menetapkan dan memberikan ijin kepada Pemohon (Termohon) untuk mengucapkan ikrar talak satu Raj'i terhadap Termohon (Pemohon) di hadapan sidang Pengadilan Agama Demak;
- III. Membebaskan biaya perkara ini sesuai hukum yang berlaku;

### Atau

- Mohon keputusan yang seadil-adilnya sesuai dengan prinsip-prinsip peradilan yang baik (*Ex aequo et bono*).

Bahwa pada sidang yang telah ditentukan Pemohon telah datang menghadap sendiri, akan tetapi Termohon tidak datang menghadap atau menyuruh orang lain menghadap sebagai wakilnya yang sah, meskipun menurut berita acara panggilan sidang yang dibuat oleh Jurusita Pengganti Pengadilan Agama Demak yang dibacakan di sidang, Termohon telah dipanggil secara resmi dan patut dan tidak ternyata, bahwa tidak datangnya itu disebabkan oleh sesuatu halangan yang sah;

Bahwa Ketua Majelis telah berusaha menasehati Pemohon supaya bersabar untuk damai hidup rukun lagi dengan Termohon sebagai suami istri

Putusan No. 2085/Pdt.G/2020/PA. Dmk.  
Halaman 3 dari 11 halaman

#### Disclaimer

Kepaniteraan Mahkamah Agung Republik Indonesia berusaha untuk selalu mencantumkan informasi paling kini dan akurat sebagai bentuk komitmen Mahkamah Agung untuk pelayanan publik, transparansi dan akuntabilitas pelaksanaan fungsi peradilan. Namun dalam hal-hal tertentu masih dimungkinkan terjadi permasalahan teknis terkait dengan akurasi dan keterkinian informasi yang kami sajikan, hal mana akan terus kami perbaiki dari waktu ke waktu. Dalam hal Anda menemukan inakurasi informasi yang termuat pada situs ini atau informasi yang seharusnya ada, namun belum tersedia, maka harap segera hubungi Kepaniteraan Mahkamah Agung RI melalui : Email : kepaniteraan@mahkamahagung.go.id Telp : 021-384 3348 (ext.318)



## Direktori Putusan Mahkamah Agung Republik Indonesia

putusan.mahkamahagung.go.id

yang baik, akan tetapi tidak berhasil, lalu pemeriksaan perkara ini dimulai dengan membacakan surat permohonan tersebut yang isinya dipertahankan oleh Pemohon;

Bahwa atas surat permohonan Pemohon tersebut, Termohon tidak mengajukan jawabannya, karena tidak hadir di persidangan;

Bahwa meskipun Termohon tidak hadir, karena perkara ini termasuk ruang lingkup sengketa perkawinan, maka kepada Pemohon tetap dibebani wajib bukti;

Bahwa Pemohon telah mengajukan bukti-buktinya di persidangan, pada tanggal 22 Desember 2020, yaitu sebagai berikut:

### A. Bukti tertulis:

1. Fotokopi kartu tanda penduduk, Nomor 61110602022940001 tertanggal 07 Februari 2018, yang dikeluarkan oleh Kepala Dinas Kependudukan dan Pencatatan Sipil Kabupaten Demak, (P-1);
2. Fotokopi Kutipan Akta Nikah Nomor: 0570/XI2017, tertanggal 04 September 2017 yang dikeluarkan oleh Kantor Urusan Agama Kecamatan Kebonagung, Kabupaten Demak, (P-2);

Surat-surat bukti yang berupa fotokopi tersebut setelah dicocokkan dengan aslinya ternyata sesuai dan telah bermaterai cukup;

### B. Saksi-saksi:

1. **XXXX**, umur 57 tahun di bawah sumpahnya ia memberi keterangan sebagai berikut:

- Bahwa saksi padan Pemohon dan kenal Termohon yaitu sebagai isteri Pemohon;
- Bahwa Pemohon dan Termohon menikah pada tahun 2017 dan telah dikaruniai 1 orang anak;
- Bahwa setelah menikah Pemohon dan Termohon kontrak rumah di Jakarta sekitar 1 tahun kemudian pindah dan tinggal di rumah orang tua Termohon di Purworejo;
- Bahwa semula rumah tangga Pemohon dan Termohon tampak rukun harmonis, akan tetapi sejak tinggal bersama di rumah orang tua

Putusan No. 2085/Pdt.G/2020/PA. Dmk.  
Halaman 4 dari 11 halaman

#### Disclaimer

Kepaniteraan Mahkamah Agung Republik Indonesia berusaha untuk selalu mencantumkan informasi paling kini dan akurat sebagai bentuk komitmen Mahkamah Agung untuk pelayanan publik, transparansi dan akuntabilitas pelaksanaan fungsi peradilan. Namun dalam hal-hal tertentu masih dimungkinkan terjadi permasalahan teknis terkait dengan akurasi dan keterkinian informasi yang kami sajikan, hal mana akan terus kami perbaiki dari waktu ke waktu. Dalam hal Anda menemukan inakurasi informasi yang termuat pada situs ini atau informasi yang seharusnya ada, namun belum tersedia, maka harap segera hubungi Kepaniteraan Mahkamah Agung RI melalui :  
Email : [kepaniteraan@mahkamahagung.go.id](mailto:kepaniteraan@mahkamahagung.go.id) Telp : 021-384 3348 (ext.318)



# Direktori Putusan Mahkamah Agung Republik Indonesia

putusan.mahkamahagung.go.id

Termohon antara Pemohon dengan Termohon mulai terjadi perselisihan dan pertengkaran;

- Bahwa penyebab pertengkaran tersebut karena adanya kesulitan ekonomi;
- Bahwa kemudian sejak bulan Juni tahun 2019 Pemohon pergi meninggalkan Termohon dan kembali ke Jakarta hingga sekarang;
- Bahwa keluarga Pemohon sudah berusaha merukunkan Pemohon dengan Termohon, akan tetapi tidak berhasil.

2. XXXX, umur 21 tahun di bawah sumpahnya ia memberi keterangan sebagai berikut:

- Bahwa saksi teman Pemohon dan kenal Termohon yaitu sebagai isteri Pemohon;
- Bahwa Pemohon dan Termohon menikah pada tahun 2017 dan telah dikaruniai 1 orang anak;
- Bahwa setelah menikah Pemohon dan Termohon kontrak rumah di Jakarta sekitar 1 tahun kemudian pindah dan tinggal di rumah orang tua Termohon di Purworejo;
- Bahwa semula rumah tangga Pemohon dan Termohon tampak rukun harmonis, akan tetapi sejak tinggal bersama di rumah orang tua Termohon antara Pemohon dengan Termohon mulai terjadi perselisihan dan pertengkaran;
- Bahwa penyebab pertengkaran tersebut karena adanya kesulitan ekonomi;
- Bahwa kemudian sejak bulan Juni tahun 2019 Pemohon pergi meninggalkan Termohon dan kembali ke Jakarta hingga sekarang;
- Bahwa keluarga Pemohon sudah berusaha merukunkan Pemohon dengan Termohon, akan tetapi tidak berhasil.

Bahwa terhadap keterangan saksi-saksi tersebut Pemohon membenarkan dan menerimanya dan telah mencukupkan bukti-buktinya di persidangan;

Bahwa atas bukti-bukti yang diajukan oleh Pemohon tersebut, Termohon tidak mengajukan bantahannya karena tidak hadir di persidangan;

Putusan No. 2085/Pdt.G/2020/PA. Dmk.  
Halaman 5 dari 11 halaman

#### Disclaimer

Kepaniteraan Mahkamah Agung Republik Indonesia berusaha untuk selalu mencantumkan informasi paling kini dan akurat sebagai bentuk komitmen Mahkamah Agung untuk pelayanan publik, transparansi dan akuntabilitas pelaksanaan fungsi peradilan. Namun dalam hal-hal tertentu masih dimungkinkan terjadi permasalahan teknis terkait dengan akurasi dan keterkinian informasi yang kami sajikan, hal mana akan terus kami perbaiki dari waktu ke waktu. Dalam hal Anda menemukan inakurasi informasi yang termuat pada situs ini atau informasi yang seharusnya ada, namun belum tersedia, maka harap segera hubungi Kepaniteraan Mahkamah Agung RI melalui :  
Email : kepaniteraan@mahkamahagung.go.id Telp : 021-384 3348 (ext.318)

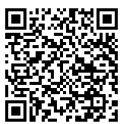

# Direktori Putusan Mahkamah Agung Republik Indonesia

putusan.mahkamahagung.go.id

Bahwa Pemohon telah menyampaikan kesimpulannya secara lisan di persidangan pada tanggal 22 Desember 2020, yang pada pokoknya tetap pada permohonannya (bercerai) dan terakhir mohon putusan;

Bahwa untuk meringkas uraian putusan ini, maka ditunjuk hal ihwal sebagaimana tercantum dalam berita acara sidang perkara ini yang merupakan bagian yang tak terpisahkan dari putusan ini.

## PERTIMBANGAN HUKUM

Menimbang, bahwa maksud dan tujuan permohonan Pemohon adalah sebagai mana telah terurai di atas ;

Menimbang, bahwa Pemohon dan Termohon beragama Islam dan telah melakukan perkawinan secara Islami, maka perkara ini merupakan kompetensi absolut Pengadilan Agama untuk memeriksa dan menyelesaikannya. ( vide Pasal 2 jo Pasal 49 ayat (1) Undang-Undang Nomor 7 Tahun 1989 yang telah diubah kedua Undang-Undang Nomor 50 Tahun 2009;

Menimbang, bahwa berdasarkan Bukti P-1 yang berupa kartu tanda penduduk maka terbukti Pemohon bertempat tinggal wilayah Kota Jakarta Barat dan jika dihubungkan dengan alamat Termohon yaitu diwilayah Kabupaten Demak, maka perkara ini secara relatif juga merupakan kompetensi Pengadilan Agama Demak untuk memeriksanya, vide Pasal 66 ayat (2) Undang-undang Nomor 7 Tahun 1989 sebagaimana telah diubah dengan Undang-undang Nomor 3 Tahun 2006 dan perubahan kedua dengan Undang-undang Nomor 50 Tahun 2009;

Menimbang, bahwa Termohon tidak pernah hadir di persidangan dan tidak pula mengirimkan orang lain sebagai wakilnya yang sah untuk menghadap di persidangan dan tidak ternyata bahwa ketidakhadirannya itu atas dasar / alasan yang dibenarkan oleh hukum maka patutlah dianggap bahwa Termohon dalam keadaan tidak hadir, karenanya putusan ini dijatuhkan tanpa hadirnya Termohon (verstek) hal mana sesuai dengan kehendak pasal 125 HIR ;

Putusan No. 2085/Pdt.G/2020/PA. Dmk.  
Halaman 6 dari 11 halaman





# Direktori Putusan Mahkamah Agung Republik Indonesia

putusan.mahkamahagung.go.id

Menimbang bahwa oleh karena Termohon tidak pernah hadir dipersidangan sehingga proses mediasi sebagaimana ketentuan PERMA Nomor 01 Tahun 2016 tidak dapat dilaksanakan;

Menimbang, bahwa berdasarkan bukti surat P-2 yang berupa foto kopi Kutipan Akta Nikah maka patut dinyatakan terbukti bahwa benar, antara Pemohon dengan Termohon telah terikat dalam perkawinan yang sah, karena itu permohonan Pemohon untuk menceraikan Termohon memiliki *dasar hukum yang sah*;

Menimbang, bahwa Pemohon mendalilkan yang pada pokoknya semula rumah tangganya rukun dan harmonis akan tetapi sejak bulan Akhir tahun 2018 antara Pemohon dengan Termohon mulai terjadi perselisihan dan pertengkaran yang penyebabnya karena adanya kesulitan ekonomi yang kemudian sejak bulan Juni tahun 2019 Pemohon pergi meninggalkan Termohon dan kembali ke Jakarta hingga sekarang dan sejak itu pula antara Pemohon dengan Termohon sudah tidak ada komonkasi lagi layaknya suami isteri;

Menimbang bahwa secara yuridis Pemohon telah menyandarkan alasan permohonannya pada ketentuan pasal 19 huruf f Peraturan Pemerintah Nomor 9 tahun 1975 jo pasal 116 huruf f Kompilasi Hukum Islam yaitu “ *Antara suami dan isteri terus menerus terjadi perselisihan dan pertengkaran dan tidak ada harapan akan hidup rukun lagi dalam rumah tangga*”;;

Menimbang bahwa ketidak hadiran Termohon dalam persidangan tanpa alasan yang sah dianggap telah mengabaikan hak bantah Termohon atas dalil-dalil Pemohon yang karenanya dinilai sebagai pengakuan Termohon secara-diam-diam (iqrar bi as-sukut);

Menimbang, bahwa dua orang saksi tersebut telah memenuhi syarat-syarat formil dan tidak terhalang kedudukannya sebagai saksi seperti yang diatur dalam Pasal 145 HIR, keduanya memberikan keterangan yang didasarkan pada pengetahuan dari pengalaman, penglihatan dan pendengarannya sendiri yang antara kedua saksi tersebut terdapat kesesuaian keterangan seperti yang disyaratkan dalam Pasal 172 HIR, oleh karena itu keterangan kedua saksi tersebut dapat dipertimbangkan;

Putusan No. 2085/Pdt.G/2020/PA. Dmk.  
Halaman 7 dari 11 halaman

#### Disclaimer

Kepaniteraan Mahkamah Agung Republik Indonesia berusaha untuk selalu mencantumkan informasi paling kini dan akurat sebagai bentuk komitmen Mahkamah Agung untuk pelayanan publik, transparansi dan akuntabilitas pelaksanaan fungsi peradilan. Namun dalam hal-hal tertentu masih dimungkinkan terjadi permasalahan teknis terkait dengan akurasi dan keterkinian informasi yang kami sajikan, hal mana akan terus kami perbaiki dari waktu ke waktu. Dalam hal Anda menemukan inakurasi informasi yang termuat pada situs ini atau informasi yang seharusnya ada, namun belum tersedia, maka harap segera hubungi Kepaniteraan Mahkamah Agung RI melalui :  
Email : [kepaniteraan@mahkamahagung.go.id](mailto:kepaniteraan@mahkamahagung.go.id) Telp : 021-384 3348 (ext.318)



## Direktori Putusan Mahkamah Agung Republik Indonesia

putusan.mahkamahagung.go.id

Menimbang, bahwa dari dalil gugatan Pemohon, sikap Pemohon selama dipersidangan dihubungkan dengan bukti surat dan keterangan-keterangan yang disampaikan oleh para saksi di persidangan, dapat ditemukan fakta sebagai berikut :

1. Bahwa Pemohon dan Termohon adalah suami isteri sah, menikah pada tanggal 03 September 2017 dan telah dikaruniai 1 anak;
2. Bahwa kemudian sejak bulan Akhir tahun 2018 antara Pemohon dengan Termohon mulai sering terjadi perselisihan dan pertengkaran disebabkan karena adanya kesulitan ekonomi;
3. Bahwa kemudian sejak bulan Juni tahun 2019 Pemohon pergi meninggalkan Termohon dan kembali ke Jakarta;
4. Bahwa selama berpisah, antara Pemohon dan Termohon tidak ada komunikasi sama sekali;
5. Bahwa keluarga Pemohon dan Termohon sudah berusaha mendamaikannya, akan tetapi tidak berhasil.

Menimbang, bahwa berdasarkan fakta poin (1) menunjukkan bahwa Pemohon dan Termohon berkualitas hukum sebagai pihak-pihak dalam perkara ini, dan Pemohon berhak mengajukan permohonan cerai talak terhadap Termohon ke Pengadilan Agama sebagaimana dimaksud pasal 66 ayat (1) Undang-undang Nomor 7 Tahun 1989;

Menimbang, bahwa dari fakta point 2, 3, 4 dan 5 sebagaimana terurai diatas telah memberikan gambaran bahwa perselisihan antara Pemohon dan Termohon sudah tidak mampu lagi dikendalikan dan diatasi oleh mereka berdua, bahkan sikap Pemohon yang telah memilih pergi meninggalkan Termohon adalah merupakan bukti bahwa perselisihan antara Pemohon dan Termohon sudah cukup serius dan bersifat terus menerus;

Menimbang bahwa dari pernyataan Pemohon selama dalam persidangan yang dengan tegas hendak menceraikan Termohon, begitu pula sikap Termohon yang tidak pernah menghadiri persidangan adalah merupakan indikasi tidak adanya kehendak dari kedua belah pihak untuk memperbaiki keadaan rumah tangganya ;

Putusan No. 2085/Pdt.G/2020/PA. Dmk.  
Halaman 8 dari 11 halaman



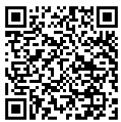

## Direktori Putusan Mahkamah Agung Republik Indonesia

putusan.mahkamahagung.go.id

Menimbang bahwa sebagaimana tersebut dalam kitab Hurriatuz Zaujani fith Thalaq Juz I halaman 83 yang diambil alih menjadi pendapat Majelis Hakim sebagai berikut :

وقد اختلر الإسلام نظام الطلاق حين تضطرب الحياة الزوجين ولم يعد ينفع فيها نصائح ولا صلح وحيث تصبح الرابطة الزواج صورة من غير روح لأن استمرار معناه أن يحكم على أحد الزوجين بالسجن الموء بد وهذا ظلم تأباه روح العدالة

Artinya : *"Islam memilih lembaga thalaq (perceraian) ketika rumah tangga sudah dianggap goncang serta dianggap sudah tidak bermanfaat lagi nasehat/ perdamaian, dan hubungan suami isteri menjadi tanpa ruh (hampa), sebab meneruskan perkawinan berarti menghukum salah satu suami isteri dengan penjara yang berkepanjangan. Ini adalah aniaya (kedhaliman) yang bertentangan dengan semangat keadilan".*

Menimbang bahwa sehubungan dengan hal tersebut Yurisprudensi Mahkamah Agung RI. Nomor 379 K / AG / 1995 tanggal 26 Maret 1997 menyatakan *"Suami isteri yang tidak berdiam serumah lagi dan tidak ada harapan untuk hidup rukun kembali maka rumah tangga tersebut telah terbukti retak dan pecah dan telah memenuhi alasan cerai Pasal 19 huruf f Peraturan Pemerintah Nomor 9 tahun 1975"*;

Menimbang, bahwa berdasarkan pertimbangan-pertimbangan tersebut di atas, maka permohonan Pemohon dinilai oleh majelis hakim telah memenuhi ketentuan Pasal 19 huruf f Peraturan Pemerintah Nomor 9 tahun 1975 jo pasal 116 huruf f Kompilasi Hukum Islam dan dengan mengingat ketentuan Pasal 125 HIR maka permohonan Pemohon sebagaimana tersebut dalam petitum 2 permohonan Pemohon dapat dikabulkan dengan verstek;

Menimbang, bahwa berdasarkan pasal 118 Kompilasi Hukum Islam maka permohonan Pemohon dikabulkan dengan memberi ijin kepada Pemohon untuk menjatuhkan talak satu raj'i atas Termohon dihadapan sidang Pengadilan Agama Demak setelah putusan ini berkekuatan hukum tetap;

Menimbang, bahwa oleh karena perkara ini termasuk dalam bidang perkawinan, berdasarkan Pasal 89 ayat (1) Undang-Undang 7 Tahun 1989 yang telah diubah dengan Undang-Undang Nomor 3 Tahun 2006 dan

Putusan No. 2085/Pdt.G/2020/PA. Dmk.  
Halaman 9 dari 11 halaman

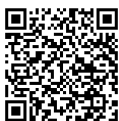

## Direktori Putusan Mahkamah Agung Republik Indonesia

putusan.mahkamahagung.go.id

perubahan kedua dengan Undang-Undang Nomor 50 Tahun 2009, maka biaya perkara ini dibebankan kepada Pemohon ;

Memperhatikan Pasal 125 HIR serta ketentuan Hukum Syara' yang bersangkutan;

### MENGADILI :

1. Menyatakan Termohon telah dipanggil secara resmi dan patut untuk datang menghadap di persidangan, tidak hadir;
2. Mengabulkan permohonan Pemohon dengan verstek;
3. Memberi izin kepada Pemohon (**Pemohon**) untuk menjatuhkan talak satu raj'i terhadap Termohon (**Termohon**) di depan sidang Pengadilan Agama Demak setelah putusan berkekuatan hukum tetap.
4. Membebankan kepada Pemohon untuk membayar biaya perkara yang hingga kini sejumlah Rp 390.000,- (tiga ratus sembilan puluh ribu rupiah);

Demikian putusan ini dijatuhkan dalam permusyawaratan Majelis Hakim di Demak pada hari Selasa tanggal 22 Desember 2020 M, bertepatan dengan tanggal 07 Jumadil Awal 1442 H, oleh kami Drs. Makali sebagai Hakim Ketua Majelis, **Dra. Nur Immawati** dan **Toharudin, S.H.I., M.H.** masing-masing sebagai Hakim Anggota. Putusan ini dibacakan oleh Ketua Majelis Hakim tersebut pada hari itu juga dalam sidang terbuka untuk umum dengan dihadiri oleh para Hakim Anggota dan **Hj. Siti Hajar Zulaikha, SH.** sebagai Panitera Pengganti dan dihadiri pula oleh Pemohon tanpa hadirnya Termohon;

Ketua Majelis

**Drs. Makali**

Hakim Anggota

Hakim Anggota

Putusan No. 2085/Pdt.G/2020/PA. Dmk.  
Halaman 10 dari 11 halaman



# Direktori Putusan Mahkamah Agung Republik Indonesia

putusan.mahkamahagung.go.id

Dra. Nur Immawati

Toharudin, S.H.I., M.H.

Panitera Pengganti

Hj. Siti Hajar Zulaikha, SH.

## Perincian Biaya Perkara :

|                                         |     |            |
|-----------------------------------------|-----|------------|
| 1. Pendaftaran                          | Rp  | 30.000,00  |
| 2. Biaya Proses                         | Rp  | 100.000,00 |
| 3. Panggilan siding                     | Rp  | 224.000,00 |
| 4. PNBP. panggilan                      | Rp. | 20.000,00  |
| 4. Redaksi                              | Rp  | 10.000,00  |
| 5. Meterai.                             | Rp  | 6.000,00   |
| J u m l a h                             | Rp  | 390.000,00 |
| (tiga ratus sembilan puluh ribu rupiah) |     |            |

Putusan No. 2085/Pdt.G/2020/PA. Dmk.  
Halaman 11 dari 11 halaman

### Disclaimer

Kepaniteraan Mahkamah Agung Republik Indonesia berusaha untuk selalu mencantumkan informasi paling kini dan akurat sebagai bentuk komitmen Mahkamah Agung untuk pelayanan publik, transparansi dan akuntabilitas pelaksanaan fungsi peradilan. Namun dalam hal-hal tertentu masih dimungkinkan terjadi permasalahan teknis terkait dengan akurasi dan keterkinian informasi yang kami sajikan, hal mana akan terus kami perbaiki dari waktu ke waktu. Dalam hal Anda menemukan inakurasi informasi yang termuat pada situs ini atau informasi yang seharusnya ada, namun belum tersedia, maka harap segera hubungi Kepaniteraan Mahkamah Agung RI melalui :  
Email : kepaniteraan@mahkamahagung.go.id Telp : 021-384 3348 (ext.318)
