# Supplementary material for: Classification of divorce causes during the COVID-19 pandemic using convolutional neural networks
Source: PeerJ journal article supplement (doi:10.7717/peerj-cs.998), 2022-06-30
Supplement: Rujuk_Dataset.zip [file Rujuk_Dataset.zip]

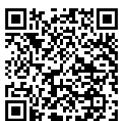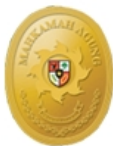

**PUTUSAN**

**Nomor 3132/Pdt.G/2020/PA.Srg**

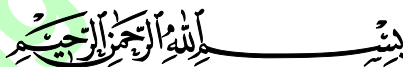

**DEMI KEADILAN BERDASARKAN KETUHANAN YANG MAHA ESA**

Pengadilan Agama Serang yang memeriksa dan mengadili perkara tertentu pada tingkat pertama dalam sidang Majelis Hakim telah menjatuhkan putusan sebagai berikut dalam perkara Cerai Gugat antara:

**PENGUGAT**, Nomor KTP xxxxxxxxxxxxxxxx, umur 24 tahun, agama Islam, pendidikan S1, pekerjaan xxxxxxxx, tempat kediaman di Komplek Griya Permai Asri Blok B12 RT. 002 RW. 005 NO.2 xxxxxxxx xxxxxx, xxxxxxxx xxxxxxx xxx, xxxx xxxxxx, xxxxxxx xxxxxx, selanjutnya disebut Pengugat;

melawan

**TERGUGAT**, umur 29 tahun, agama Islam, pendidikan SLTA, pekerjaan xxxxxxx xxxxxx, tempat kediaman di KABUPATEN SERANG, selanjutnya disebut Tergugat;

Pengadilan Agama tersebut;

Telah membaca dan mempelajari berkas perkara;

Telah mendengar keterangan Pengugat;

Telah memeriksa alat-alat bukti Pengugat;

**DUDUK PERKARA**

Menimbang, bahwa Pengugat dengan surat gugatannya tertanggal 25 November 2020 yang terdaftar di Kepaniteraan Pengadilan Agama Serang dengan register perkara Nomor 3132/Pdt.G/2020/PA.Srg, mengemukakan hal-hal sebagai berikut:

1. Bahwa Pengugat adalah Isteri sah dari Tergugat yang telah melaksanakan pernikahan pada tanggal 16 Juli 2016, dihadapan Pegawai Pencatat Nikah Kantor Urusan Agama xxxxxxxx xxxxxxx xxx, xxxx xxxxxx, sebagaimana

Hal. 1 dari 11 Hal. Putusan No.3132/Pdt.G/2020/PA.Srg

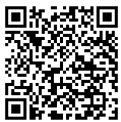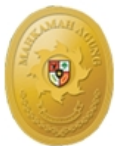

# Direktori Putusan Mahkamah Agung Republik Indonesia

putusan.mahkamahagung.go.id

terbukti dalam Buku Kutipan Akta Nikah Nomor: 0357/011/VII/2016 tertanggal 18 Juli 2016;

2. Bahwa setelah menikah Penggugat dan Tergugat hidup berumah tangga terakhir tinggal di Kontrakan KOTA CILEGON;
3. Bahwa selama berumah tangga antara Penggugat dengan Tergugat telah berhubungan sebagaimana layaknya suami istri dan telah dikaruniai 1 (satu) orang anak yang bernama; xxxxxx xxxxxx xxxxxxxx, laki-laki, lahir di Serang, 31 Desember 2016;
4. Bahwa semula rumah tangga Penggugat dengan Tergugat berjalan rukun dan harmonis, namun sejak Februari 2017 rumah tangga dirasakan mulai goyah sering terjadi perselisihan dan pertengkaran yang disebabkan oleh hal-hal sebagai berikut:
  - 4.1 Tergugat dalam memberikan nafkah lahir terhadap Penggugat hanya sekedarnya saja;
  - 4.2 Orang tua Tergugat terlalu ikut campur dalam urusan rumah tangga Penggugat dengan Tergugat;
  - 4.3 Tergugat memiliki sifat egois;
5. Bahwa perselisihan dan pertengkaran tersebut mencapai puncaknya terjadi sejak bulan Mei 2020. Akibatnya antara Penggugat dan Tergugat berpisah rumah dan sejak saat itu sampai sekarang Tergugat tidak kembali lagi dan sudah tidak ada hubungan layaknya suami istri;
6. Bahwa, rumah tangga tersebut sudah sulit untuk dibina menjadi suatu rumah tangga yang baik dan harmonis kembali, sehingga tujuan perkawinan untuk membentuk suatu rumah tangga yang sakinah, mawaddah dan rahmah sudah tidak mungkin tercapai lagi;
7. Bahwa Penggugat bersedia membayar biaya perkara sesuai dengan ketentuan yang berlaku;

Bahwa berdasarkan alasan-alasan tersebut di atas, Penggugat mohon kepada Bapak Ketua Pengadilan Agama Serang cq. Majelis Hakim yang memeriksa perkara ini berkenan memutuskan sebagai berikut :

- a. Mengabulkan gugatan Penggugat;

Hal. 2 dari 11 Hal. Putusan No.3132/Pdt.G/2020/PA.Srg



# Direktori Putusan Mahkamah Agung Republik Indonesia

putusan.mahkamahagung.go.id

- b. Menjatuhkan talak satu ba'in suhra Tergugat (TERGUGAT) kepada Penggugat (PENGGUGAT);
- c. Menetapkan biaya perkara menurut hukum

Dan apabila Majelis Hakim berpendapat lain, mohon putusan yang seadil-adilnya (ex aequo et bono);

Bahwa pada hari sidang yang telah ditetapkan, Penggugat datang menghadap sendiri di persidangan, sedangkan Tergugat tidak pernah datang menghadap dan tidak pula menyuruh orang lain untuk menghadap sebagai wakil atau kuasanya yang sah, meskipun telah dipanggil secara resmi dan patut dan tidak ternyata ketidakhadirannya tersebut disebabkan oleh suatu halangan yang sah, maka perkara ini diperiksa tanpa hadirnya Tergugat;

Bahwa upaya perdamaian dan mediasi tidak dapat dilaksanakan karena Tergugat tidak pernah hadir di persidangan;

Bahwa selanjutnya pemeriksaan perkara dilakukan dalam sidang tertutup untuk umum dengan terlebih dahulu dibacakan surat gugatan Penggugat yang isi dan maksudnya tetap dipertahankan oleh Penggugat;

Bahwa oleh karena Tergugat atau kuasanya yang sah tidak pernah hadir di persidangan, maka jawaban Tergugat atas gugatan Penggugat tidak dapat didengarkan;

Bahwa untuk menguatkan dalil-dalil gugatannya, Penggugat mengajukan alat bukti surat dan saksi-saksi sebagai berikut :

## A. Bukti Surat.

1. Fotokopi Kartu Tanda Penduduk (KTP) NIK xxxxxxxxxxxxxxxx atas nama Penggugat dari Kantor Dinas Kependudukan dan Pencatatan Sipil xxxx xxxxxx, bukti surat tersebut telah diberi meterai cukup, telah dicap pos dan telah dicocokkan dengan aslinya yang ternyata sesuai, diberi tanda P1;
2. Fotokopi Kutipan Akta Nikah dari Kantor Urusan Agama xxxxxxxx xxxxxxxx xxxx, xxxx xxxxxx, Nomor 0357/011/VII/2016 Tanggal 18 Juli 2016, bukti surat tersebut telah diberi meterai cukup, telah dicap pos dan telah dicocokkan dengan aslinya yang ternyata sesuai, diberi tanda P2;

## B. Bukti Saksi.

Hal. 3 dari 11 Hal. Putusan No.3132/Pdt.G/2020/PA.Srg

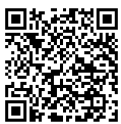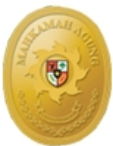

# Direktori Putusan Mahkamah Agung Republik Indonesia

putusan.mahkamahagung.go.id

1. **SAKSI 1**, umur 51 tahun, agama Islam, pekerjaan xxxxxxxx xxxxx xxxxxx, bertempat tinggal di KOTA SERANG, di bawah sumpah memberikan keterangan yang pada pokoknya sebagai berikut :

- Bahwa saksi kenal dengan Penggugat dan Tergugat yang bernama xxxxx xxxxxxxxxxxx;
- Bahwa saksi tahu antara Penggugat dengan Tergugat adalah suami isteri yang telah menikah pada tahun 2016;
- Bahwa setelah menikah Penggugat dengan Tergugat membina rumah tangga bersama terakhir di KOTA CILEGON;
- Bahwa Penggugat dengan Tergugat telah dikaruniai 1 orang anak;
- Bahwa kehidupan rumah tangga Penggugat dengan Tergugat pada awalnya hidup rukun dan harmonis, namun sekarang ini rumah tangga mereka tidak harmonis lagi karena sering terjadi perselisihan dan pertengkaran yang terus menerus;
- Bahwa perselisihan dan pertengkaran Penggugat dengan Tergugat terjadi sejak 3 tahun yang lalu;
- Bahwa sepengetahuan saksi bahwa penyebab perselisihan dan pertengkaran Penggugat dengan Tergugat disebabkan karena Tergugat dalam memberikan nafkah keuangan kepada Penggugat hanya sekedarnya dan orang tua Tergugat terlalu ikut campur dalam mengurus urusan rumah tangga Penggugat dengan Tergugat;
- Bahwa saksi sering mendengar dari aduan Penggugat yang bercerita tentang permasalahan rumah tangganya dengan Tergugat ;
- Bahwa Penggugat dengan Tergugat sudah pisah tempat tinggal sejak bulan Mei 2020;
- Bahwa yang meninggalkan kediaman bersama adalah Tergugat pergi meninggalkan Penggugat sampai dengan sekarang;
- Bahwa selama pisah Tergugat tidak pernah datang, dan tidak pernah lagi memberi nafkah untuk Penggugat, dan Tergugat sudah tidak memperdulikan Penggugat lagi serta sudah tidak pernah lagi berkomunikasi;

Hal. 4 dari 11 Hal. Putusan No.3132/Pdt.G/2020/PA.Srg

#### Disclaimer

Kepaniteraan Mahkamah Agung Republik Indonesia berusaha untuk selalu mencantumkan informasi paling kini dan akurat sebagai bentuk komitmen Mahkamah Agung untuk pelayanan publik, transparansi dan akuntabilitas pelaksanaan fungsi peradilan. Namun dalam hal-hal tertentu masih dimungkinkan terjadi permasalahan teknis terkait dengan akurasi dan keterkinian informasi yang kami sajikan, hal mana akan terus kami perbaiki dari waktu ke waktu. Dalam hal Anda menemukan inakurasi informasi yang termuat pada situs ini atau informasi yang seharusnya ada, namun belum tersedia, maka harap segera hubungi Kepaniteraan Mahkamah Agung RI melalui : Email : [kepaniteraan@mahkamahagung.go.id](mailto:kepaniteraan@mahkamahagung.go.id) Telp : 021-384 3348 (ext.318)

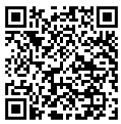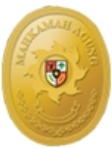

# Direktori Putusan Mahkamah Agung Republik Indonesia

putusan.mahkamahagung.go.id

- Bahwa pernah dinasehati agar Penggugat bersabar dan rukun kembali membina rumah tangganya dengan Tergugat, namun tidak berhasil karena tidak ada perubahan pada diri Tergugat dan juga Penggugat sudah tidak mau rukun kembali;
- Bahwa saksi sudah tidak sanggup untuk merukunkan kembali Penggugat dengan Tergugat;

2. **SAKSI 2**, umur 37 tahun, agama Islam, pekerjaan xxxxxxxx xxxxxx, bertempat tinggal di Lontar Baru No.15 RT.002 RW.001, Kelurahan xxxxxx xxxx, xxxxxxxxxx xxxxxx, xxxx xxxxxx, di bawah sumpah memberikan keterangan yang pada pokoknya sebagai berikut :

- Bahwa saksi kenal dengan Penggugat dan Tergugat yang bernama xxxxx xxxxxxxxxxxx;
- Bahwa saksi tahu antara Penggugat dengan Tergugat adalah suami isteri yang telah menikah pada tahun 2016;
- Bahwa setelah menikah Penggugat dengan Tergugat membina rumah tangga bersama terakhir di KOTA CILEGON;
- Bahwa Penggugat dengan Tergugat telah dikaruniai 1 orang anak;
- Bahwa kehidupan rumah tangga Penggugat dengan Tergugat pada awalnya hidup rukun dan harmonis, namun sekarang inirumah tangga mereka tidak harmonis lagi karena sering terjadi perselisihan dan pertengkaran yang terus menerus;
- Bahwa perselisihan dan pertengkaran Penggugat dengan Tergugat terjadi sejak 3 tahun yang lalu;
- Bahwa sepengetahuan saksi bahwa penyebab perselisihan dan pertengkaran Penggugat dengan Tergugat disebabkan karena Tergugat tempramental, dan Tergugat dalam memberikan nafkah keuangan kepada Penggugat hanya sekedarnya saja. Selain itu orang tua Tergugat terlalu ikut campur dalam mengurus urusan rumah tangga Penggugat dengan Tergugat;
- Bahwa saksi pernah melihat Penggugat dengan Tergugat bertengkar;
- Bahwa Penggugat dengan Tergugat sudah pisah tempat tinggal sejak bulan Mei 2020;

Hal. 5 dari 11 Hal. Putusan No.3132/Pdt.G/2020/PA.Srg

#### Disclaimer

Kepaniteraan Mahkamah Agung Republik Indonesia berusaha untuk selalu mencantumkan informasi paling kini dan akurat sebagai bentuk komitmen Mahkamah Agung untuk pelayanan publik, transparansi dan akuntabilitas pelaksanaan fungsi peradilan. Namun dalam hal-hal tertentu masih dimungkinkan terjadi permasalahan teknis terkait dengan akurasi dan keterkinian informasi yang kami sajikan, hal mana akan terus kami perbaiki dari waktu ke waktu. Dalam hal Anda menemukan inakurasi informasi yang termuat pada situs ini atau informasi yang seharusnya ada, namun belum tersedia, maka harap segera hubungi Kepaniteraan Mahkamah Agung RI melalui : Email : [kepaniteraan@mahkamahagung.go.id](mailto:kepaniteraan@mahkamahagung.go.id) Telp : 021-384 3348 (ext.318)



# Direktori Putusan Mahkamah Agung Republik Indonesia

putusan.mahkamahagung.go.id

- Bahwa yang meninggalkan kediaman bersama adalah Tergugat pergi meninggalkan Penggugat sampai dengan sekarang;
- Bahwa selama pisah Tergugat tidak pernah datang, dan tidak pernah lagi memberi nafkah untuk Penggugat, dan Tergugat sudah tidak memperdulikan Penggugat lagi serta sudah tidak pernah lagi berkomunikasi;
- Bahwa pernah dinasehati agar Penggugat bersabar dan rukun kembali membina rumah tangganya dengan Tergugat, namun tidak berhasil karena tidak ada perubahan pada diri Tergugat dan juga Penggugat sudah tidak mau rukun kembali;
- Bahwa saksi sudah tidak sanggup untuk merukunkan kembali Penggugat dengan Tergugat;

Bahwa selanjutnya Penggugat menyatakan tidak akan mengajukan apapun lagi dan menyampaikan kesimpulan yang pada pokoknya tetap pada gugatan semula serta mohon putusan;

Bahwa untuk mempersingkat uraian putusan ini, ditunjuk segala sesuatu yang tercantum dalam berita acara persidangan perkara ini sebagai bagian yang tidak terpisahkan dari isi putusan ini;

## **PERTIMBANGAN HUKUM**

Menimbang, bahwa maksud dan tujuan gugatan Penggugat adalah seperti diuraikan tersebut di atas;

Menimbang, bahwa oleh karena Tergugat tidak pernah hadir di persidangan dan tidak pula mengutus wakil atau kuasanya tanpa alasan sekalipun kepadanya telah dipanggil secara resmi dan patut, dengan demikian sesuai ketentuan Pasal 125 ayat 1 HIR perkara ini dapat diputus dengan Verstek;

Menimbang, bahwa mediasi atas perkara ini tidak bisa dilaksanakan karena menurut Peraturan Mahkamah Agung RI Nomor 1 Tahun 2016 tentang Prosedur Mediasi di Pengadilan, mediasi mengharuskan kehadiran kedua belah pihak yang berperkara, sedang Tergugat tidak hadir di persidangan. Namun demikian sesuai ketentuan pasal 130 ayat 1 HIR jo pasal 82 ayat 1 Undang-Undang Nomor 7 Tahun 1989 tentang Peradilan Agama sebagaimana telah

*Hal. 6 dari 11 Hal. Putusan No.3132/Pdt.G/2020/PA.Srg*





## Direktori Putusan Mahkamah Agung Republik Indonesia

putusan.mahkamahagung.go.id

diubah dengan Undang-Undang Nomor 3 Tahun 2006 dan telah diubah kembali dengan Undang-Undang Nomor 50 Tahun 2009, Majelis telah berupaya menasehati Penggugat agar tetap mempertahankan ikatan perkawinannya dengan Tergugat, akan tetapi upaya tersebut tidak berhasil;

Menimbang, bahwa yang menjadi masalah pokok dalam perkara ini adalah Penggugat mengajukan gugatan cerai terhadap Tergugat dengan alasan rumah tangganya sudah tidak rukun, sering terjadi perselisihan dan pertengkaran yang puncaknya sejak bulan Mei 2020 antara Penggugat dengan Tergugat berpisah rumah dan sampai sekarang tidak pernah tinggal bersama lagi layaknya suami isteri yang baik;

Menimbang, bahwa oleh karena Tergugat atas ketidak hadirannya di persidangan telah tidak melakukan bantahan terhadap gugatan Penggugat terutama dalam hal adanya perselisihan dalam rumah tangga antara Penggugat dengan Tergugat dan hal-hal yang menyebabkan perselisihan itu terjadi, sehingga dapat diduga adanya pengakuan Tergugat sepanjang yang tersurat dalam surat gugat;

Menimbang, bahwa berdasarkan ketentuan Pasal 125 HIR yaitu putusan yang dijatuhkan tanpa hadirnya Tergugat dapat dikabulkan sepanjang berdasarkan hukum dan beralasan, oleh karena itu majelis membebani Penggugat untuk membuktikan dalil-dalil gugatannya;

Menimbang, bahwa dalam tahap pembuktian Penggugat telah mengajukan bukti P.1 dan P.2, serta telah menghadirkan 2 (dua) orang saksi;

Menimbang, bahwa bukti P.1 yang diajukan Penggugat merupakan bukti otentik tentang identitas Penggugat, oleh karenanya dinilai terbukti bahwa Penggugat sebagai pihak yang berkepentingan dalam perkara ini dan pula bertempat kediaman di wilayah hukum Pengadilan Agama Serang;

Menimbang, bahwa bukti P.2 yang diajukan Penggugat adalah merupakan bukti otentik yang menerangkan bahwa Penggugat dan Tergugat telah melangsungkan pernikahan pada tanggal 18 Juli 2016, bukti tersebut telah memenuhi syarat formil dan materil pembuktian, oleh karenanya Majelis menilai hubungan Penggugat dan Tergugat sebagai suami istri dinyatakan telah terbukti;

Hal. 7 dari 11 Hal. Putusan No.3132/Pdt.G/2020/PA.Srg

### Disclaimer

Kepaniteraan Mahkamah Agung Republik Indonesia berusaha untuk selalu mencantumkan informasi paling kini dan akurat sebagai bentuk komitmen Mahkamah Agung untuk pelayanan publik, transparansi dan akuntabilitas pelaksanaan fungsi peradilan. Namun dalam hal-hal tertentu masih dimungkinkan terjadi permasalahan teknis terkait dengan akurasi dan keterkinian informasi yang kami sajikan, hal mana akan terus kami perbaiki dari waktu ke waktu. Dalam hal Anda menemukan inakurasi informasi yang termuat pada situs ini atau informasi yang seharusnya ada, namun belum tersedia, maka harap segera hubungi Kepaniteraan Mahkamah Agung RI melalui : Email : [kepaniteraan@mahkamahagung.go.id](mailto:kepaniteraan@mahkamahagung.go.id) Telp : 021-384 3348 (ext.318)



## Direktori Putusan Mahkamah Agung Republik Indonesia

putusan.mahkamahagung.go.id

Menimbang, bahwa dua orang saksi yang diajukan oleh Penggugat adalah orang dewasa dan telah disumpah sehingga memenuhi syarat formal sebagaimana diatur dalam Pasal 145 ayat 1 angka 3e HIR. Kedua orang saksi tersebut menerangkan di bawah sumpah yang pada pokoknya bahwa Penggugat dan Tergugat sebagai suami istri namun rumah tangganya sudah tidak rukun lagi, sering terjadi perselisihan dan pertengkaran, puncaknya antara Penggugat dan Tergugat sudah berpisah tempat tinggal sejak bulan Mei 2020 serta tidak pernah kumpul lagi sebagaimana layaknya suami isteri. Keterangan dua orang saksi tersebut bersesuaian satu sama lain dan berdasarkan pengetahuannya sendiri. Oleh karenanya, keterangan dua orang saksi tersebut telah memenuhi syarat materiil sebagaimana telah diatur dalam Pasal 171 HIR, sehingga keterangan dua orang saksi tersebut memiliki kekuatan pembuktian dan dapat diterima sebagai alat bukti;

Menimbang, bahwa berdasarkan dalil Penggugat yang tidak dibantah oleh Tergugat dan diperkuat dengan keterangan saksi-saksi di bawah sumpahnya menurut Majelis Hakim merupakan indikasi adanya perselisihan antara Penggugat dengan Tergugat sedangkan upaya perdamaian dengan maksud agar mereka dapat hidup rukun kembali dalam rumah tangga telah dilakukan baik oleh saksi-saksi, keluarga maupun Pengadilan dalam setiap persidangan, akan tetapi tidak berhasil. maka majelis dapat menarik suatu kesimpulan yang merupakan fakta bahwa antara Penggugat dengan Tergugat telah terjadi perselisihan dalam rumah tangga yang sulit untuk dirukunkan lagi;

Menimbang, bahwa oleh karena perkawinan tersebut sudah tidak rukun lagi, lebih-lebih antara Penggugat dengan Tergugat sudah berpisah tempat tinggal dan hidup sendiri-sendiri yang menunjukkan hubungan interpersonal sudah tidak terkoordinasi dan sudah saling tidak memenuhi hak dan kewajiban sebagai suami isteri, maka disini sudah ada bukti bahwa rumah tangga antara Penggugat dengan Tergugat sudah retak dan tidak ada lagi ikatan lahir bathin, sehingga tujuan perkawinan untuk membentuk rumah tangga yang bahagia dan kekal sebagaimana dimaksud Pasal 1 Undang-Undang Nomor 1 Tahun 1974 tentang Perkawinan atau rumah tangga yang sakinah mawaddah dan rahmah sebagaimana dikehendaki dalam Alqur'an surat Ar-Rum ayat (21) jo Pasal 3

Hal. 8 dari 11 Hal. Putusan No.3132/Pdt.G/2020/PA.Srg





# Direktori Putusan Mahkamah Agung Republik Indonesia

putusan.mahkamahagung.go.id

Kompilasi Hukum Islam (KHI) tidak dapat diwujudkan dalam rumah tangga Penggugat dan Tergugat;

Menimbang, bahwa Majelis perlu mengemukakan ketentuan yang termaktub dalam Kitab Fiqih Ash Shawi jilid IV Halaman 204 :

فإن اختلف بأن لم توجد بينهما محبة ولا مودة فالمناسب المفاارقة

Artinya : *"Maka jika telah terjadi perselisihan dengan tidak diperoleh diantara keduanya kasih sayang, maka pantaslah perceraian";*

Menimbang, bahwa meskipun perceraian adalah suatu perbuatan yang sedapat mungkin dihindari, namun apabila tujuan perkawinan sudah tidak dapat terwujud, maka mempertahankan perkawinan dalam kondisi sebagaimana tersebut di atas justru akan menimbulkan kemudharatan bagi kedua belah pihak berperkara, keturunan dan keluarga mereka;

Menimbang, bahwa berdasarkan pertimbangan tersebut di atas, maka dalil gugatan Penggugat telah memenuhi ketentuan Pasal 39 ayat 2 Undang-Undang Nomor 1 Tahun 1974 jo Pasal 19 huruf f Peraturan Pemerintah Nomor 9 Tahun 1975 jo Pasal 116 huruf f Kompilasi Hukum Islam, dengan demikian petitum gugatan cerai Penggugat dapat dikabulkan dengan menjatuhkan talak satu ba'in shugra Tergugat terhadap Penggugat sesuai ketentuan Pasal 119 ayat (2) huruf c Kompilasi Hukum Islam;

Menimbang, bahwa oleh karena perkara ini merupakan perkara perceraian, maka sesuai ketentuan Pasal 89 ayat 1 Undang-Undang Nomor 7 Tahun 1989 tentang Peradilan Agama dan perubahannya, maka biaya perkara dibebankan kepada Penggugat;

Mengingat segala peraturan perundang-undangan yang berlaku dan dalil-dalil syar'i yang berkaitan dengan perkara ini;

## MENGADILI

1. Menyatakan Tergugat yang telah dipanggil secara resmi dan patut untuk menghadap di persidangan, tidak hadir;
2. Mengabulkan gugatan Penggugat dengan verstek;

Hal. 9 dari 11 Hal. Putusan No.3132/Pdt.G/2020/PA.Srg

### Disclaimer

Kepaniteraan Mahkamah Agung Republik Indonesia berusaha untuk selalu mencantumkan informasi paling kini dan akurat sebagai bentuk komitmen Mahkamah Agung untuk pelayanan publik, transparansi dan akuntabilitas pelaksanaan fungsi peradilan. Namun dalam hal-hal tertentu masih dimungkinkan terjadi permasalahan teknis terkait dengan akurasi dan keterkinian informasi yang kami sajikan, hal mana akan terus kami perbaiki dari waktu ke waktu. Dalam hal Anda menemukan inakurasi informasi yang termuat pada situs ini atau informasi yang seharusnya ada, namun belum tersedia, maka harap segera hubungi Kepaniteraan Mahkamah Agung RI melalui : Email : [kepaniteraan@mahkamahagung.go.id](mailto:kepaniteraan@mahkamahagung.go.id) Telp : 021-384 3348 (ext.318)



## Direktori Putusan Mahkamah Agung Republik Indonesia

putusan.mahkamahagung.go.id

3. Menjatuhkan talak satu bal'in shughra Tergugat (TERGUGAT) terhadap Penggugat (PENGGUGAT);
4. Membebaskan kepada Penggugat untuk membayar biaya perkara ini sejumlah Rp 576.000,00 (lima ratus tujuh puluh enam ribu rupiah);

Demikian diputuskan dalam musyawarah Majelis Hakim Pengadilan Agama Serang pada hari Selasa tanggal 29 Desember 2020 Miladiyah bertepatan dengan tanggal 14 Jumadil Awwal 1442 Hijriyah oleh Drs. H. Saifudin Z., S.H.,M.H sebagai Ketua Majelis, Dra. Hj. Ai Jamilah, M.H dan Tuti Sudiarti, S.H.,M.H, masing-masing sebagai Hakim Anggota, putusan tersebut diucapkan pada hari itu juga dalam sidang terbuka untuk umum oleh Ketua Majelis beserta para Hakim Anggota tersebut, dan didampingi oleh Ricky Adjie Purnama, S.H.I sebagai Panitera Pengganti, dengan dihadiri oleh Penggugat tanpa hadirnya Tergugat.

Ketua Majelis,

Ttd.

**Drs. H. Saifudin Z., S.H.,M.H**

Hakim Anggota,

Ttd.

**Dra. Hj. Ai Jamilah, M.H**

Hakim Anggota,

Ttd.

**Tuti Sudiarti, S.H.,M.H**

Panitera Pengganti,

Ttd.

**Ricky Adjie Purnama, S.H.I**

Hal. 10 dari 11 Hal. Putusan No.3132/Pdt.G/2020/PA.Srg

### Disclaimer

Kepaniteraan Mahkamah Agung Republik Indonesia berusaha untuk selalu mencantumkan informasi paling kini dan akurat sebagai bentuk komitmen Mahkamah Agung untuk pelayanan publik, transparansi dan akuntabilitas pelaksanaan fungsi peradilan. Namun dalam hal-hal tertentu masih dimungkinkan terjadi permasalahan teknis terkait dengan akurasi dan keterkinian informasi yang kami sajikan, hal mana akan terus kami perbaiki dari waktu ke waktu. Dalam hal Anda menemukan inakurasi informasi yang termuat pada situs ini atau informasi yang seharusnya ada, namun belum tersedia, maka harap segera hubungi Kepaniteraan Mahkamah Agung RI melalui : Email : [kepaniteraan@mahkamahagung.go.id](mailto:kepaniteraan@mahkamahagung.go.id) Telp : 021-384 3348 (ext.318)



## Direktori Putusan Mahkamah Agung Republik Indonesia

putusan.mahkamahagung.go.id

### Perincian biaya :

|                  |      |                 |
|------------------|------|-----------------|
| - Pendaftaran    | : Rp | 30.000,00       |
| - ATK Perkara    | : Rp | 75.000,00       |
| - Panggilan      | : Rp | 435.000,00      |
| - PNPB Panggilan | : Rp | 20.000,00       |
| - Redaksi        | : Rp | 10.000,00       |
| - Meterai        | : Rp | <u>6.000,00</u> |

J u m l a h : Rp 576.000,00

(lima ratus tujuh puluh enam ribu rupiah).

Untuk Salinan yang sesuai dengan aslinya,

Panitera

Pengadilan Agama Serang

**Drs. H. Baehaki., M.Sy**

### Catatan :

Salinan Putusan diberikan kepada ..... pada tanggal .....  
dan telah/belum\*) berkekuatan hukum tetap.

Hal. 11 dari 11 Hal. Putusan No.3132/Pdt.G/2020/PA.Srg

#### Disclaimer

Kepaniteraan Mahkamah Agung Republik Indonesia berusaha untuk selalu mencantumkan informasi paling kini dan akurat sebagai bentuk komitmen Mahkamah Agung untuk pelayanan publik, transparansi dan akuntabilitas pelaksanaan fungsi peradilan. Namun dalam hal-hal tertentu masih dimungkinkan terjadi permasalahan teknis terkait dengan akurasi dan keterkinian informasi yang kami sajikan, hal mana akan terus kami perbaiki dari waktu ke waktu. Dalam hal Anda menemukan inakurasi informasi yang termuat pada situs ini atau informasi yang seharusnya ada, namun belum tersedia, maka harap segera hubungi Kepaniteraan Mahkamah Agung RI melalui :  
Email : kepaniteraan@mahkamahagung.go.id Telp : 021-384 3348 (ext.318)
