# Supplementary material for: Classification of divorce causes during the COVID-19 pandemic using convolutional neural networks
Source: PeerJ journal article supplement (doi:10.7717/peerj-cs.998), 2022-06-30
Supplement: Rujuk_Dataset.zip [file Rujuk_Dataset.zip]

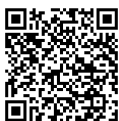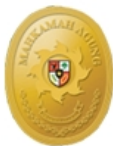

**PUTUSAN**

**Nomor 3911/Pdt.G/2020/PA.Bks**

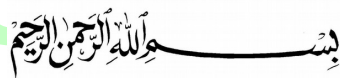

**DEMI KEADILAN BERDASARKAN KETUHANAN YANG MAHA ESA  
PENGADILAN AGAMA BEKASI**

Memeriksa dan mengadili perkara perdata agama pada tingkat pertama telah menjatuhkan putusan dalam perkara Cerai Talak antara:

**XXXX**, tempat dan tanggal lahir Bekasi 26 April 1994, umur 26 tahun, agama Islam, pendidikan SLTA, pekerjaan Karyawan Swasta, tempat tinggal di XXXX, sebagai **Pemohon**;

melawan

**XXXX**, tempat dan tanggal lahir Bekasi 19 Oktober 1994, umur 26 tahun, agama Islam, pendidikan SLTA, pekerjaan Karyawan Swasta, tempat tinggal di XXXX, sebagai **Termohon**;

Pengadilan Agama tersebut;

Telah mempelajari berkas perkara ini;

**DUDUK PERKARA**

Bahwa Pemohon telah mengajukan permohonan Cerai Talak pada tanggal 19 November 2020 yang telah terdaftar di Kepaniteraan Pengadilan Agama Bekasi pada tanggal yang sama tercatat dalam register perkara Nomor 3911/Pdt.G/2020/PA.Bks telah mengemukakan hal-hal sebagai berikut:

1. Bahwa Pemohon dengan Termohon telah melangsungkan pernikahan pada hari Kamis tanggal 08 Januari 2015, yang dicatat oleh Pegawai Pencatat Nikah Kantor Urusan Agama Kecamatan XXXX, sesuai Kutipan Akta Nikah Nomor XXXX, tanggal 08 Januari 2015 dan setelah akad nikah Termohon sebagaimana dalam Kutipan Akta Nikah tersebut;
2. Bahwa setelah menikah, Pemohon dengan Termohon XXXX;

*Hal. 1 dari 12 Hal. Putusan Nomor 3911/Pdt.G/2020/PA.Bks*



## Direktori Putusan Mahkamah Agung Republik Indonesia

putusan.mahkamahagung.go.id

3. Bahwa selama pernikahan tersebut Pemohon dengan Termohon telah hidup bersama sebagaimana layaknya suami istri dan telah dikaruniai keturunan 4 (empat) orang anak
4. Bahwa rumah tangga Pemohon dengan Termohon awalnya rukun-rukun saja selama bulan Februari 2020 namun setelah itu dalam rumah tangga Pemohon dengan Termohon terus menerus terjadi perselisihan dan pertengkaran disebabkan antara lain:  
Termohon sering mengeluh dengan nafkah lahir yang Pemohon berikan padahal Pemohon sudah berusaha maksimal untuk memenuhi kebutuhan rumah tangga dan kebutuhan Termohon. Pemohon setiap bulan memberi uang sebesar Rp. 2.800.000-, (dua juta delapan ratus ribu rupiah);
5. Bahwa puncak perselisihan dan pertengkaran antara Pemohon dan Termohon terjadi pada 01 Agustus 2020 disebabkan pisah rumah, sampai saat ini Pemohon dan Termohon telah berpisah kurang lebih 4 bulan lamanya lamanya dan selama berpisah antara Pemohon dan Termohon sudah tidak ada lagi hubungan baik lahir maupun batin dan Termohon tidak pernah memberikan nafkah wajib kepada Pemohon;
6. Bahwa pihak keluarga Pemohon dan Termohon telah berupaya mengatasi masalah tersebut dengan jalan musyawarah namun tidak berhasil;
7. Bahwa, dengan sikap dan perbuatan Termohon tersebut, Pemohon merasa tersiksa baik lahir maupun batin sehingga Pemohon tidak sanggup lagi berumah tangga dengan Termohon, oleh karenanya Pemohon bermaksud bercerai dengan Termohon di depan sidang Pengadilan Agama Bekasi;
8. Bahwa Pemohon bersedia membayar seluruh biaya yang timbul dalam perkara ini;

Bahwa berdasarkan dalil-dalil tersebut di atas, maka Pemohon mohon kepada Ketua Pengadilan Agama Bekasi cq. Majelis Hakim untuk memeriksa dan mengadili perkara ini, dan selanjutnya dapat memutuskan sebagai berikut :

### **PRIMAIR:**

1. Mengabulkan permohonan Pemohon;

Hal. 2 dari 12 Hal. Putusan Nomor 3911/Pdt.G/2020/PA.Bks

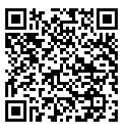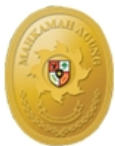

## Direktori Putusan Mahkamah Agung Republik Indonesia

putusan.mahkamahagung.go.id

2. Memberikan izin kepada Pemohon (XXXX) untuk menjatuhkan talak satu raj'i terhadap Termohon (XXXX) di hadapan sidang Pengadilan Agama Bekasi;
3. Membebaskan biaya perkara kepada Pemohon sesuai dengan hukum yang berlaku;

### SUBSIDAIR:

Dan, atau apabila Majelis Hakim berpendapat lain, mohon untuk menjatuhkan putusan yang seadil-adilnya (ex aequo et bono);

Bahwa pada hari sidang yang telah ditetapkan, Pemohon datang menghadap sendiri di persidangan, sedangkan Termohon tidak datang menghadap dan tidak menyuruh orang lain untuk menghadap sebagai kuasanya, meskipun menurut relaas panggilan Nomor 3911/Pdt.G/2020/PA.Bks tanggal 26 November 2020, dan tanggal 17 Desember 2020. Termohon telah dipanggil secara sah dan patut sedangkan tidak ternyata bahwa ketidak hadirannya Termohon tersebut disebabkan oleh suatu halangan yang sah ;

Bahwa Majelis Hakim telah berusaha menasehati Pemohon untuk bersabar dan hidup rukun lagi dengan Termohon, akan tetapi tidak berhasil, lalu dibacakan surat gugatan Pemohon yang isinya tetap dipertahankan oleh Pemohon;

Bahwa untuk memperkuat dalil-dalilnya, Pemohon telah mengajukan bukti-bukti surat berupa :

- 1.Fotokopi Kartu Tanda Penduduk (KTP), atas nama Pemohon yang dikeluarkan oleh pemerintah kota Bekasi, bukti surat tersebut telah diberi meterai cukup dan telah dicocokkan dengan aslinya yang ternyata sesuai, lalu oleh Ketua Majelis diberi tanda P1;
- 2.Fotokopi Kutipan Akta Nikah Nomor 30/30/I/2015 tanggal 08 Januari 2015 yang dikeluarkan oleh Kantor Urusan Agama Kecamatan KUA Kecamatan Bekasi Selatan, Kota Bekasi, bukti surat tersebut telah diberi meterai cukup dan telah dicocokkan dengan aslinya yang ternyata sesuai, lalu oleh Ketua Majelis diberi tanda P.2;

Bahwa selain itu Pemohon mengajukan bukti saksi dari keluarga dan

Hal. 3 dari 12 Hal. Putusan Nomor 3911/Pdt.G/2020/PA.Bks



# Direktori Putusan Mahkamah Agung Republik Indonesia

putusan.mahkamahagung.go.id

tetangga dekatnya sebagai berikut :

1. **XXXX**, tempat tinggal di XXXX, di hadapan sidang saksi tersebut memberikan keterangan di bawah sumpah yang pada pokoknya sebagai berikut :

4. B  
ahwa saksi kenal dengan Pemohon dengan Termohon karena saya adalah Ibu Pemohon;

5. Bahwa benar Pemohon dan Termohon adalah suami isteri yang telah menikah pada tanggal 08 Januari 2015 di XXXX;

6. Bahwa Pemohon dan Termohon tinggal bersama di XXXX;

7. Bahwa saksi mengetahui Pemohon dengan Termohon adalah suami istri dan telah dikaruniai keturunan 4 (empat) orang anak;

8. Bahwa sejak bulan Februari 2020 rumah tangga Pemohon dan Termohon sering terjadi perselisihan dan pertengkaran terus menerus yang penyebabnya karena Termohon sering mengeluh dengan nafkah lahir yang Pemohon berikan padahal Pemohon sudah berusaha maksimal untuk memenuhi kebutuhan rumah tangga dan kebutuhan Termohon. Pemohon setiap bulan memberi uang sebesar Rp. 2.800.000-, (dua juta delapan ratus ribu rupiah);;

9. Bahwa Saksi melihat dan mendengar sendiri pertengkaran antara Pemohon dan Termohon;

10. Bahwa Pemohon dan Termohon sudah pisah rumah sejak 01 Agustus 2020 sampai sekarang;

11. Bahwa selama berpisah rumah, mereka tidak pernah berkomunikasi layaknya suami istri;

12. Bahwa, pihak dari keluarga kedua belah pihak telah berupaya untuk merukunkan kembali dan saksi sudah beberapa kali memberi saran agar rukun lagi, akan tetapi tidak berhasil;

2. **XXXX**, bertempat tinggal di XXXX, dihadapan sidang saksi tersebut memberikan keterangan di bawah sumpah yang pada pokoknya sebagai berikut :

Hal. 4 dari 12 Hal. Putusan Nomor 3911/Pdt.G/2020/PA.Bks



13. B  
ahwa saksi kenal dengan Pemohon dan Termohon karena saksi bibi Pemohon;

14. Bahwa benar Pemohon dan Termohon adalah suami isteri yang telah menikah pada tanggal 08 Januari 2015 di XXXX;

15. Bahwa setelah menikah Pemohon dan Termohon bertempat tinggal terakhir diXXXX;

16. Bahwa setelah menikah Pemohon dan Termohon hidup rukun dan harmonis sebagaimana layaknya suami isteri dan telah dikaruniai keturunan 4 (empat) orang anak;

17. Bahwa sejak bulan Februari 2020 rumah tangga Pemohon dan Termohon sering terjadi perselisihan dan pertengkaran terus menerus yang penyebabnya karena Termohon sering mengeluh dengan nafkah lahir yang Pemohon berikan padahal Pemohon sudah berusaha maksimal untuk memenuhi kebutuhan rumah tangga dan kebutuhan Termohon. Pemohon setiap bulan memberi uang sebesar Rp. 2.800.000-, (dua juta delapan ratus ribu rupiah);;

18. Bahwa, Saksi melihat dan mendengar sendiri pertengkaran antara Pemohon dan Termohon;

19. Bahwa, Pemohon dan Termohon sudah pisah rumah sejak 01 Agustus 2020 sampai sekarang dan sudah tidak pernah lagi berkomunikasi yang baik layaknya suami isteri;

20. Bahwa, pihak dari keluarga kedua belah pihak telah berupaya untuk merukunkan kembali dan saksi sudah beberapa kali memberi saran agar rukun lagi, akan tetapi tidak berhasil;

Bahwa Pemohon menyampaikan kesimpulan yang isinya sebagaimana tertuang dalam berita acara sidang;

Selanjutnya untuk singkatnya uraian putusan ini, maka semua yang termuat dalam berita acara sidang merupakan bagian yang tidak terpisahkan dari putusan ini;

#### **PERTIMBANGAN HUKUM**

*Hal. 5 dari 12 Hal. Putusan Nomor 3911/Pdt.G/2020/PA.Bks*



Menimbang, bahwa maksud dan tujuan permohonan Pemohon pada pokoknya adalah sebagaimana tersebut di atas ;

Menimbang, bahwa ternyata Termohon telah dipanggil secara resmi dan patut untuk menghadap di persidangan akan tetapi Termohon tidak hadir dan tidak ternyata bahwa tidak hadirnya itu disebabkan oleh suatu halangan yang sah, oleh karena itu Termohon harus dinyatakan tidak hadir dan karenanya gugatan Pemohon tersebut dapat diputus dengan verstek, sesuai dengan pasal 125 ayat (1) HIR ;

**Dalam Pokok Perkara**

Menimbang, bahwa inti permohonan Pemohon adalah permohonan cerai talak terhadap Termohon dengan alasan pasal 19 huruf f Peraturan Pemerintah Nomor 9 Tahun 1975 jo Pasal 116 huruf (f) Kompilasi Hukum Islam yaitu : *"antara suami dan isteri terus menerus terjadi perselisihan dan pertengkaran dan tidak ada harapan akan hidup rukun lagi dalam rumah tangga"*, oleh karena itu yang harus dibuktikan oleh Pemohon adalah kejadian yang dijadikan alasan tersebut.

**Analisis Pembuktian**

Menimbang, bahwa Pemohon meskipun tidak ada bantahan telah mengajukan bukti surat P.1 dan P.2 serta dua orang saksi;

Menimbang, bahwa bukti P.1 (Foto Copy Kartu Tanda Penduduk atas nama Pemohon) telah memenuhi syarat formil dan materiil sebagai akta otentik, oleh karena itu mempunyai kekuatan pembuktian yang sempurna dan mengikat sesuai Pasal 165 HIR juncto Pasal 1870 KUHPerdara, membuktikan bahwa identitas Pemohon benar sebagaimana tercantum dalam gugatannya.

Menimbang, bahwa bukti P.2 (Foto Copy Kutipan Akta Nikah atas nama Pemohon dan Termohon) telah memenuhi syarat formil dan materiil sebagai akta otentik, oleh karena itu mempunyai kekuatan pembuktian yang sempurna dan mengikat sesuai Pasal 165 HIR juncto Pasal 1870 KUHPerdara, membuktikan bahwa Pemohon dengan Termohon menikah sah di hadapan Pegawai Pencatat Nikah di XXXX;

Menimbang, bahwa saksi 1 dan 2 dari Pemohon memenuhi syarat formil dan materiil sebagai saksi sesuai Pasal 145 ayat (1) HIR dan Pasal 171

*Hal. 6 dari 12 Hal. Putusan Nomor 3911/Pdt.G/2020/PA.Bks*





## Direktori Putusan Mahkamah Agung Republik Indonesia

putusan.mahkamahagung.go.id

dan 172 HIR. sehingga membuktikan bahwa Pemohon dan Termohon bertempat tinggal terakhir di XXXX, telah dikaruniai keturunan 4 (empat) orang anak, sejak bulan Februari 2020 rumah tangga Pemohon dan Termohon sering terjadi pertengkaran terus menerus yang penyebabnya karena Termohon sering mengeluh dengan nafkah lahir yang Pemohon berikan padahal Pemohon sudah berusaha maksimal untuk memenuhi kebutuhan rumah tangga dan kebutuhan Termohon. Pemohon setiap bulan memberi uang sebesar Rp. 2.800.000-, (dua juta delapan ratus ribu rupiah); dan sejak saat itu antara Pemohon dan Termohon sudah tidak terjalin hubungan sebagaimana layaknya suami dan istri hingga saat ini;

Bahwa saksi sudah beberapa kali memberi saran kepada Pemohon dan Termohon agar rukun lagi, tetapi tidak berhasil;

### Fakta Hukum

Menimbang, bahwa berdasarkan analisis bukti-bukti dari kedua belah pihak ditemukan fakta-fakta sebagai berikut:

1. Bahwa Pemohon dan Termohon telah menikah sah di hadapan Pegawai Pencatat Nikah pada tanggal 08 Januari 2015 di XXXX;
2. Bahwa Pemohon dan Termohon telah tinggal bersama terakhir di XXXX dan dari pernikahan tersebut mereka telah dikaruniai keturunan 4 (empat) orang anak;
3. Bahwa sejak bulan Februari 2020 rumah tangga Pemohon dan Termohon sering terjadi perselisihan dan pertengkaran terus menerus yang penyebabnya karena Termohon sering mengeluh dengan nafkah lahir yang Pemohon berikan padahal Pemohon sudah berusaha maksimal untuk memenuhi kebutuhan rumah tangga dan kebutuhan Termohon. Pemohon setiap bulan memberi uang sebesar Rp. 2.800.000-, (dua juta delapan ratus ribu rupiah);;
4. Bahwa puncak perselisihan dan pertengkaran antara Pemohon dengan Termohon tersebut sejak 01 Agustus 2020 dimana antara Pemohon dan Termohon telah pisah rumah sampai sekarang;
5. Bahwa keluarga Pemohon dan Termohon sudah menasihati Pemohon supaya rukun lagi dengan Termohon, namun tidak berhasil.

Hal. 7 dari 12 Hal. Putusan Nomor 3911/Pdt.G/2020/PA.Bks

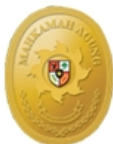

**Pertimbangan Petitem Perceraian**

Menimbang, bahwa berdasarkan petitem gugatan Pemohon dan fakta hukum tersebut di atas, Majelis Hakim memberi pertimbangan sebagai berikut:

Bahwa terhadap fakta hukum tersebut, Majelis Hakim mempertimbangkan penerapan hukumnya (*mengkonstitutir*) sesuai alasan gugatan Pemohon yaitu Pasal 19 huruf (f) Peraturan Pemerintah Nomor 9 Tahun 1975 jo. Pasal 116 huruf (f) Kompilasi Hukum Islam yang unsur-unsurnya yaitu:

1. *"Antara suami dan isteri"* : fakta hukum pada angka 1 menunjukkan Pemohon dan Termohon adalah suami isteri sah dan belum pernah bercerai ;
2. *"Terus menerus terjadi perselisihan dan pertengkaran"* : fakta hukum pada angka 3 dan 4 tersebut telah menunjukkan sejak bulan Februari 2020 rumah tangga Pemohon dan Termohon sering terjadi pertengkaran terus menerus yang penyebabnya karena Termohon sering mengeluh dengan nafkah lahir yang Pemohon berikan padahal Pemohon sudah berusaha maksimal untuk memenuhi kebutuhan rumah tangga dan kebutuhan Termohon. Pemohon setiap bulan memberi uang sebesar Rp. 2.800.000-, (dua juta delapan ratus ribu rupiah); yang puncaknya sejak 01 Agustus 2020 antara Pemohon dan Termohon telah pisah rumah sampai sekarang.
3. *"Tidak ada harapan untuk hidup rukun lagi dalam rumah tangga"*. Unsur ini secara nyata dan meyakinkan telah terpenuhi oleh fakta hukum pada angka 5 dimana semua usaha perdamaian telah dilakukan tetapi akhirnya tidak berhasil merukunkan Pemohon dengan Termohon ;-

Menimbang, bahwa ternyata dari fakta hukum di atas telah terpenuhi pula maksud pasal 22 Peraturan Pemerintah Nomor 9 Tahun 1975 jo Pasal 134 KHI yaitu telah jelas sebab akar permasalahan pertengkaran antara Pemohon dengan Termohon dari saksi-saksi orang dekat dan mereka menyatakan sudah berusaha mendamaikan Pemohon dan Termohon akan tetapi tidak berhasil;

Menimbang, bahwa di samping itu ternyata dari fakta hukum di atas gugatan Pemohon juga memenuhi alasan perceraian Pasal 19 huruf f

*Hal. 8 dari 12 Hal. Putusan Nomor 3911/Pdt.G/2020/PA.Bks*



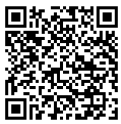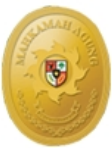

## Direktori Putusan Mahkamah Agung Republik Indonesia

putusan.mahkamahagung.go.id

Peraturan Pemerintah Nomor 9 Tahun 1975 jo. Pasal 116 huruf f Kompilasi Hukum Islam yaitu: "Antara suami dan isteri terus-menerus terjadi perselisihan dan pertengkaran dan tidak ada harapan akan hidup rukun lagi dalam rumah tangga".

Menimbang, bahwa dalam suatu rumah tangga jika suami istri telah terjadi pertengkaran dan perselisihan yang telah berlangsung lama disebabkan karena Termohon sering mengeluh dengan nafkah lahir yang Pemohon berikan padahal Pemohon sudah berusaha maksimal untuk memenuhi kebutuhan rumah tangga dan kebutuhan Termohon. Pemohon setiap bulan memberi uang sebesar Rp. 2.800.000-, (dua juta delapan ratus ribu rupiah); kemudian telah pisah rumah dan keduanya telah diusahakan perdamaian akan tetapi tidak berhasil, maka keadaan tersebut menurut Majelis Hakim merupakan bukti rumah tangga yang telah pecah atau *broken marriage* dan tidak mungkin dapat dipertahankan lagi karenanya tidak akan bisa mencapai tujuan perkawinan sebagaimana Al-qur'an surat Ar-Rum ayat 21 jo pasal 1 Undang-Undang No. 1 / 1974, yaitu terbentuknya keluarga sakinah, mawaddah warahmah ;

Menimbang, bahwa di samping itu keadaan sebagaimana fakta hukum tersebut diatas bila tidak segera diselesaikan, maka berpotensi menimbulkan pelanggaran Undang-Undang Republik Indonesia Nomor 23 Tahun 2004 Tentang Penghapusan Kekerasan Dalam Rumah Tangga, pasal 5 dan 9 ayat (1) yaitu :

Pasal 5 : *"Setiap orang dilarang melakukan kekerasan dalam rumah tangga terhadap orang dalam lingkup rumah tangganya, dengan cara: 1.kekerasan fisik; 2.kekerasan psikis; 3. kekerasan seksual; atau 4. penelantaran rumah tangga".*

Pasal 9 : (1). *"Setiap orang dilarang menelantarkan orang dalam lingkup rumah tangganya, padahal menurut hukum yang berlaku baginya atau karena persetujuan atau perjanjian ia wajib memberikan kehidupan, perawatan, atau pemeliharaan kepada orang tersebut".-*

Menimbang, bahwa fakta hukum tersebut juga telah memenuhi norma hukum Islam yang diambil sebagai pendapat Majelis, yaitu ketentuan dalam Fiqhussunnah juz II yang berbunyi:

Hal. 9 dari 12 Hal. Putusan Nomor 3911/Pdt.G/2020/PA.Bks

#### Disclaimer

Kepaniteraan Mahkamah Agung Republik Indonesia berusaha untuk selalu mencantumkan informasi paling kini dan akurat sebagai bentuk komitmen Mahkamah Agung untuk pelayanan publik, transparansi dan akuntabilitas pelaksanaan fungsi peradilan. Namun dalam hal-hal tertentu masih dimungkinkan terjadi permasalahan teknis terkait dengan akurasi dan keterkinian informasi yang kami sajikan, hal mana akan terus kami perbaiki dari waktu ke waktu. Dalam hal Anda menemukan inakurasi informasi yang termuat pada situs ini atau informasi yang seharusnya ada, namun belum tersedia, maka harap segera hubungi Kepaniteraan Mahkamah Agung RI melalui :  
Email : [kepaniteraan@mahkamahagung.go.id](mailto:kepaniteraan@mahkamahagung.go.id) Telp : 021-384 3348 (ext.318)



*Artinya : “Dan jika dakwaan isteri telah terbukti di hadapan hakim ( tentang kamadlorotan dari suami) dengan bukti-bukti yang diajukan oleh isteri atau pengakuan suami, dan dakwaan isteri menunjukkan ketidakmampuan kedua belah pihak untuk melanjutkan hidup bersama sebagai suami istri sedang hakim tidak berhasil mendamaikan keduanya, maka hakim menjatuhkan talak bain”;*

Menimbang, bahwa atas dasar pertimbangan tersebut di atas, Majelis Hakim berpendapat bahwa gugatan Pemohon telah memenuhi ketentuan Pasal 39 ayat (2) Undang-undang Nomor 1 Tahun 1974 jo. Pasal 19 huruf f Peraturan Pemerintah Nomor 9 Tahun 1975, jo. Pasal 116 huruf f Kompilasi Hukum Islam;

Menimbang, bahwa berdasarkan hal-hal tersebut di atas, maka Gugatan Pemohon dinyatakan telah cukup alasan sebagaimana ketentuan Pasal 19 huruf (f) Peraturan Pemerintah Nomor 9 Tahun 1975 jo. Pasal 116 huruf (f) Kompilasi Hukum Islam, sehingga telah memenuhi ketentuan Pasal 39 Undang-Undang Nomor 1 Tahun 1974 tentang Perkawinan, oleh karena itu gugatan Pemohon dapat dikabulkan dengan jatuh talah satu bain sughra dari Termohon kepada Pemohon;

#### **Biaya Perkara**

Menimbang, bahwa karena perkara *a quo* masuk dalam bidang perkawinan, berdasarkan Pasal 89 ayat (1) Undang-Undang Nomor 7 Tahun 1989 tentang Peradilan Agama sebagaimana telah diubah dengan Undang-Undang Nomor 3 Tahun 2006 dan perubahan kedua dengan Undang-Undang Nomor 50 Tahun 2009, maka biaya perkara ini dibebankan kepada Pemohon;

Mengingat, semua peraturan perundang-undangan yang berlaku dan hukum syara' yang berkaitan dengan perkara ini;

#### **Amar putusan**

#### **MENGADILI**

1. Menyatakan, Termohon telah dipanggil dengan patut untuk datang menghadap di persidangan tidak hadir;
2. Mengabulkan permohonan Pemohon dengan verstek;

Hal. 10 dari 12 Hal. Putusan Nomor 3911/Pdt.G/2020/PA.Bks



# Direktori Putusan Mahkamah Agung Republik Indonesia

putusan.mahkamahagung.go.id

3. Memberi izin kepada Pemohon (XXXX) untuk menjatuhkan talak satu raj'i terhadap Termohon (XXXX), di depan sidang Pengadilan Agama Bekasi;
4. Membebaskan kepada Pemohon untuk membayar biaya perkara sebesar Rp. 496.000 ,- (empat ratus sembilan puluh enam ribu)

## Penutup

Demikian putusan ini dijatuhkan dalam rapat permusyawaratan Majelis Hakim yang dilangsungkan pada hari Selasa tanggal 29 Desember 2020 Masehi bertepatan dengan tanggal 14 Jumadil Awwal 1442 Hijriah oleh kami Dra. Hj. Nurroh Sunah, S.H. sebagai Ketua Majelis, Drs. Suyadi dan Drs. Uman, M.Sy, masing-masing sebagai Hakim Anggota, putusan tersebut diucapkan dalam sidang terbuka untuk umum pada hari itu juga oleh Ketua Majelis tersebut dengan didampingi oleh Hakim Anggota dan didampingi oleh Zulhemi, S.H sebagai Panitera Pengganti, dengan dihadiri oleh Pemohon tanpa hadirnya Termohon.

Ketua Majelis,

**Dra. Hj. Nurroh Sunah, S.H.**

Hakim Anggota,

Hakim Anggota,

**Drs. Suyadi**

Panitera Pengganti,

**Drs. Uman, M.Sy**

**Zulhemi, S.H**

Rincian biaya:

Hal. 11 dari 12 Hal. Putusan Nomor 3911/Pdt.G/2020/PA.Bks

### Disclaimer

Kepaniteraan Mahkamah Agung Republik Indonesia berusaha untuk selalu mencantumkan informasi paling kini dan akurat sebagai bentuk komitmen Mahkamah Agung untuk pelayanan publik, transparansi dan akuntabilitas pelaksanaan fungsi peradilan. Namun dalam hal-hal tertentu masih dimungkinkan terjadi permasalahan teknis terkait dengan akurasi dan keterkinian informasi yang kami sajikan, hal mana akan terus kami perbaiki dari waktu ke waktu. Dalam hal Anda menemukan inakurasi informasi yang termuat pada situs ini atau informasi yang seharusnya ada, namun belum tersedia, maka harap segera hubungi Kepaniteraan Mahkamah Agung RI melalui : Email : kepaniteraan@mahkamahagung.go.id Telp : 021-384 3348 (ext.318)



## Direktori Putusan Mahkamah Agung Republik Indonesia

putusan.mahkamahagung.go.id

|                      |             |                   |
|----------------------|-------------|-------------------|
| 1. Biaya Pendaftaran | : Rp        | 30.000,00         |
| 2. Biaya Proses      | : Rp        | 50.000,00         |
| 3. PNBP Panggilan    | : Rp        | 20.000,00         |
| 4. Biaya Panggilan   | : Rp        | 380.000,00        |
| 5. Biaya Redaksi     | : Rp        | 10.000,00         |
| 6. Biaya Meterai     | : Rp        | 6.000,00          |
| <b>JUMLAH</b>        | <b>: Rp</b> | <b>496.000,00</b> |

(empat ratus sembilan puluh enam ribu rupiah).

Hal. 12 dari 12 Hal. Putusan Nomor 3911/Pdt.G/2020/PA.Bks
