# Supplementary material for: Classification of divorce causes during the COVID-19 pandemic using convolutional neural networks
Source: PeerJ journal article supplement (doi:10.7717/peerj-cs.998), 2022-06-30
Supplement: Rujuk_Dataset.zip [file Rujuk_Dataset.zip]

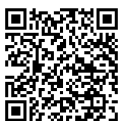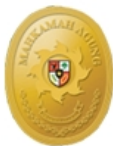

**PUTUSAN**

Nomor 6234/Pdt.G/2020/PA.Jr

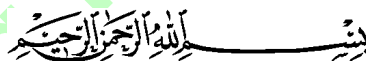

**DEMI KEADILAN BERDASARKAN KETUHANAN YANG MAHA ESA**

Pengadilan Agama Jember yang memeriksa dan mengadili perkara perkara tertentu dalam tingkat pertama telah menjatuhkan putusan dalam perkara cerai gugat antara:

**PENGUGAT**, umur 55 tahun, agama Islam, pekerjaan Ibu Rumah Tangga, tempat kediaman di Kabupaten Jember, dalam hal ini memberi kuasa kepada Hery Purwoto, S.H adalah Advokat yang berkantor di Jalan Mastrip Ruko Pandora 8-1 Kabupaten Jember, berdasarkan Surat Kuasa Khusus tanggal 15-12-2020, selanjutnya disebut sebagai Penggugat;

Melawan

**TERGUGAT**, umur 60 tahun, agama Islam, pekerjaan Swasta, tempat kediaman di Kabupaten Jember, selanjutnya disebut sebagai Tergugat;

Pengadilan Agama tersebut;

Telah mempelajari surat-surat yang berkaitan dengan perkara ini;

Telah mendengar keterangan Penggugat serta para saksi dimuka sidang;

**DUDUK PERKARA**

Bahwa Penggugat dalam surat gugatannya tanggal 17 Desember 2020 yang telah didaftar di Kepaniteraan Pengadilan Agama Jember Nomor 6234/Pdt.G/2020/PA.Jr tanggal 17 Desember 2020, dengan dalil-dalil sebagai berikut:

1. Bahwa Penggugat dan Tergugat telah menikah pada tanggal 18 Januari 1984, yang dicatatkan pada Kantor Urusan Agama Kecamatan Ambulu Kabupaten jember dengan Kutipan Akta Nikah Nomor 577/39/I/84 tanggal 19 Januari 1984;
2. Bahwa Penggugat dan Tergugat menikah, Penggugat dan Tergugat memilih tempat kediaman di rumah orangtua Penggugat;

hal. 1 dari 8 hal. Salinan Putusan Nomor 6234/Pdt.G/2020/PA.Jr

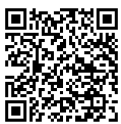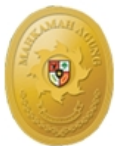

## Direktori Putusan Mahkamah Agung Republik Indonesia

putusan.mahkamahagung.go.id

3. Bahwa Penggugat dan Tergugat hidup telah berhubungan layaknya suami istri (ba'dad dukhul) dan sudah mempunyai 2 anak bernama ANAK I, umur 34 tahun dan ANAK II, umur 23 tahun;
4. Bahwa pada mulanya rumah tangga Penggugat dan Tergugat berjalan dengan baik, akan tetapi sejak  $\pm$  9 tahun lalu yang lalu, rumah tangga Penggugat dan Tergugat mulai goyah, sering terjadi perselisihan dan pertengkaran yang disebabkan karena masalah ekonomi, Tergugat tidak bisa mencukupi kebutuhan sehari-hari, hal inilah yang menyebabkan rumah tangga tidak harmonis lagi;
5. Bahwa perselisihan dan pertengkaran antara Penggugat dan Tergugat tersebut makin lama makin memuncak, akhirnya Tergugat pergi meninggalkan tempat kediaman bersama sejak  $\pm$  8 tahun dan sekarang berada dirumah ;
6. Bahwa sejak itu antara Penggugat dan Tergugat telah hidup berpisah yang hingga sekarang sudah  $\pm$  8 tahun dan selama hidup berpisah tersebut sudah tidak ada hubungan lagi layaknya suami istri;
7. Bahwa atas sikap dan perbuatan Tergugat yang demikian itu, Penggugat mengalami penderitaan lahir dan bathin yang berkepanjangan;
8. Bahwa Penggugat sudah berusaha memulihkan ketentraman rumah tangga dengan Tergugat akan tetapi tidak berhasil, akhirnya Penggugat sudah tidak sanggup lagi membina rumah tangga dengan Tergugat;
9. Bahwa Penggugat sanggup membayar biaya perkara;
10. Bahwa atas dasar alasan-alasan sebagaimana tersebut diatas, Penggugat mohon kepada Pengadilan Agama Jember agar berkenan memeriksa perkara ini dan menjatuhkan putusan sebagai berikut :

Primair :

1. Mengabulkan gugatan Penggugat;
2. Menjatuhkan talak satu ba'in dari Tergugat terhadap Penggugat;
3. Membebaskan biaya perkara ini sesuai ketentuan hukum yang berlaku;

Subsidaire :

Atau mohon putusan yang seadil-adilnya :

hal. 2 dari 8 hal. Salinan Putusan Nomor 6234/Pdt.G/2020/PA.Jr

#### Disclaimer

Kepaniteraan Mahkamah Agung Republik Indonesia berusaha untuk selalu mencantumkan informasi paling kini dan akurat sebagai bentuk komitmen Mahkamah Agung untuk pelayanan publik, transparansi dan akuntabilitas pelaksanaan fungsi peradilan. Namun dalam hal-hal tertentu masih dimungkinkan terjadi permasalahan teknis terkait dengan akurasi dan keterkinian informasi yang kami sajikan, hal mana akan terus kami perbaiki dari waktu ke waktu. Dalam hal Anda menemukan inakurasi informasi yang termuat pada situs ini atau informasi yang seharusnya ada, namun belum tersedia, maka harap segera hubungi Kepaniteraan Mahkamah Agung RI melalui :  
Email : kepaniteraan@mahkamahagung.go.id Telp : 021-384 3348 (ext.318)

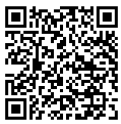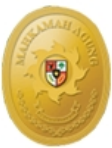

# Direktori Putusan Mahkamah Agung Republik Indonesia

putusan.mahkamahagung.go.id

Bahwa pada hari dan tanggal persidangan yang telah ditetapkan Penggugat diwakili Kuasanya, sedangkan Tergugat telah tidak datang menghadap dan tidak menyuruh orang lain untuk menghadap sebagai wakil/kuasanya, meskipun telah dipanggil secara patut;

Bahwa Majelis Hakim telah berusaha menasehati Penggugat agar mau rukun kembali dengan Tergugat, akan tetapi tidak berhasil, kemudian dibacakan gugatan Penggugat, yang ternyata isinya tetap dipertahankan oleh Penggugat;

Bahwa untuk menguatkan dalil gugatannya, Penggugat telah dapat mengajukan alat bukti tertulis berupa :

1. Fotokopi Kartu Tanda Penduduk an. Penggugat yang dikeluarkan oleh Kantor Dinas Kependudukan dan Pencatatan Sipil Kabupaten Jember tanggal 21 Desember 2014 (P.1);
2. Fotokopi Kutipan Akta Nikah Nomor 577/39/I/84 yang dikeluarkan oleh Kepala Kantor Urusan Agama Kecamatan Ambulu Kabupaten Jember tanggal 19 Januari 1984 (P.2);

Bahwa sehubungan dengan bukti-bukti surat tersebut, para pihak menyatakan tidak keberatan;

Bahwa Penggugat telah mengajukan saksi-saksi dipersidangan yaitu :

1. SAKSI I, umur 40 tahun, agama Islam, pekerjaan wiraswasta, bertempat tinggal di Kabupaten Jember

Saksi memberikan keterangan di bawah sumpah pada pokoknya sebagai berikut:

- Saksi tahu dan kenal dengan para pihak karena Saksi Menantu Penggugat;
- Penggugat dan Tergugat sebagai suami istri setelah menikah mereka tinggal di rumah orangtua Penggugat dan sudah mempunyai 2 anak bernama ANAK I, umur 34 tahun dan ANAK II, umur 23 tahun;
- Bahwa Saksi tahu kini rumah tangga Penggugat dan Tergugat sudah tidak harmonis lagi dan penyebab percekocokan mereka itu karena masalah ekonomi, Tergugat tida bisa mencukupi kebutuhan sehari-hari;
- Bahwa sekarang Penggugat dan Tergugat telah berpisah selama ± 8 tahun dan sekarang Tergugat berada dirumah orangtua Tergugat ;

hal. 3 dari 8 hal. Salinan Putusan Nomor 6234/Pdt.G/2020/PA.Jr

#### Disclaimer

Kepaniteraan Mahkamah Agung Republik Indonesia berusaha untuk selalu mencantumkan informasi paling kini dan akurat sebagai bentuk komitmen Mahkamah Agung untuk pelayanan publik, transparansi dan akuntabilitas pelaksanaan fungsi peradilan. Namun dalam hal-hal tertentu masih dimungkinkan terjadi permasalahan teknis terkait dengan akurasi dan keterkinian informasi yang kami sajikan, hal mana akan terus kami perbaiki dari waktu ke waktu. Dalam hal Anda menemukan inakurasi informasi yang termuat pada situs ini atau informasi yang seharusnya ada, namun belum tersedia, maka harap segera hubungi Kepaniteraan Mahkamah Agung RI melalui : Email : [kepaniteraan@mahkamahagung.go.id](mailto:kepaniteraan@mahkamahagung.go.id) Telp : 021-384 3348 (ext.318)



# Direktori Putusan Mahkamah Agung Republik Indonesia

putusan.mahkamahagung.go.id

- Dan selama pisah itu saksi tidak pernah tahu keduanya rukun lagi layaknya suami istri;
- Saksi sudah berusaha menasehati kedua belah pihak untuk rukun lagi membina rumah tangga akan tetapi tidak berhasil, Penggugat tetap pada pendiriannya untuk bercerai dengan Tergugat;

2. SAKSI II, umur 29 tahun, agama Islam, pekerjaan wiraswasta, bertempat tinggal di Kabupaten Jember;

Saksi memberikan keterangan dibawah sumpah pada pokoknya sebagai berikut :

- Saksi tahu dan kenal dengan para pihak karena saksi Keponakan Penggugat;
- Saksi tahu Penggugat dan Tergugat adalah sebagai suami istri dan setelah menikah keduanya tinggal di rumah orangtua Penggugat dan sudah mempunyai 2 anak bernama ANAK I, umur 34 tahun dan ANAK II, umur 23 tahun;
- Namun kini rumah tangga Penggugat dan Tergugat sudah tidak harmonis lagi, dan penyebab percekocokan itu karena masalah ekonomi, Tergugat tida bisa mencukupi kebutuhan sehari-hari;
- Bahwa sekarang Penggugat dan Tergugat telah berpisah selama  $\pm$  8 tahun dan sekarang Tergugat berada dirumah orangtua Tergugat ;
- Dan selama pisah itu saksi tidak pernah tahu keduanya rukun lagi layaknya suami istri;
- Saksi sudah berusaha menasehati keduanya untuk rukun lagi akan tetapi tidak berhasil, Penggugat tetap ingin cerai dari Tergugat;

Bahwa atas bukti bukti tersebut telah dibenarkan oleh Penggugat;

Bahwa selanjutnya Penggugat tidak mengajukan tanggapan apapun dan mohon putusan;

Selanjutnya untuk mempersingkat uraian putusan ini ditunjuk hal hal sebagaimana tercantum dalam Berita Acara Sidang perkara ini yang merupakan bagian tak terpisahkan dari putusan ini;

## **PERTIMBANGAN HUKUM**

Menimbang bahwa maksud dan tujuan gugatan Penggugat adalah seperti diuraikan tersebut di atas;

hal. 4 dari 8 hal. Salinan Putusan Nomor 6234/Pdt.G/2020/PA.Jr

### Disclaimer

Kepaniteraan Mahkamah Agung Republik Indonesia berusaha untuk selalu mencantumkan informasi paling kini dan akurat sebagai bentuk komitmen Mahkamah Agung untuk pelayanan publik, transparansi dan akuntabilitas pelaksanaan fungsi peradilan. Namun dalam hal-hal tertentu masih dimungkinkan terjadi permasalahan teknis terkait dengan akurasi dan keterkinian informasi yang kami sajikan, hal mana akan terus kami perbaiki dari waktu ke waktu. Dalam hal Anda menemukan inakurasi informasi yang termuat pada situs ini atau informasi yang seharusnya ada, namun belum tersedia, maka harap segera hubungi Kepaniteraan Mahkamah Agung RI melalui :  
Email : kepaniteraan@mahkamahagung.go.id Telp : 021-384 3348 (ext.318)



# Direktori Putusan Mahkamah Agung Republik Indonesia

putusan.mahkamahagung.go.id

Menimbang bahwa berdasarkan bukti P.1 telah ternyata Penggugat bertempat kediaman di wilayah Kabupaten Jember, dengan demikian berdasarkan Pasal 73 ayat (1) Undang undang Nomor 7 Tahun 1989 tentang Peradilan Agama yang telah diubah dengan Undang Undang Nomor 3 Tahun 2006, terakhir diubah dengan Undang Undang Nomor 50 Tahun 2009 Pengadilan Agama Jember berwenang untuk memeriksa dan mengadili perkara aquo;

Menimbang bahwa karena ternyata Tergugat meskipun telah dipanggil secara patut, tidak menghadap, pula tidak ternyata bahwa ketidakhadirannya itu disebabkan oleh suatu halangan yang sah, maka Tergugat harus dinyatakan tidak hadir;

Menimbang, bahwa Majelis Hakim telah berusaha menasehati Penggugat agar mau rukun kembali dengan Tergugat akan tetapi tidak berhasil;

Menimbang, bahwa berdasarkan bukti P.2, telah terbukti bahwa Penggugat dan Tergugat adalah suami isteri yang sah;

Menimbang, bahwa gugatan Penggugat didasarkan pada dalil yang pada pokoknya adalah bahwa setelah hidup bersama rumah tangga di antara Penggugat dan Tergugat telah terjadi perselisihan dan pertengkaran disebabkan karena masalah ekonomi, Tergugat tida bisa mencukupi kebutuhan sehari-hari;

Menimbang bahwa sikap Tergugat yang telah tidak hadir dipersidangan dapat dipandang bahwa ia tidak hendak membantah dalil-dalil gugatan Penggugat, dengan demikian dalil gugatan Penggugat telah menjadi fakta yang tetap;

Menimbang bahwa Penggugat telah mengajukan dua orang saksi, dan dari keterangan para saksi tersebut yang bersesuaian satu sama lain telah terungkap fakta yang pada pokoknya menguatkan dalil gugatan Penggugat;

Menimbang bahwa sejak terjadinya perselisihan dan pertengkaran tersebut sampai dengan tahap akhir persidangan, selama  $\pm 8$  tahun, telah ternyata Penggugat dan Tergugat sudah tidak berhubungan lagi sebagai suami isteri/hidup berpisah, halmana membuktikan bahwa perselisihan dan pertengkaran Penggugat dan Tergugat telah berlangsung terus menerus;

Menimbang bahwa Majelis Hakim dan pihak keluarga telah tidak berhasil menasehati Penggugat dengan Tergugat, pula telah ternyata Penggugat

hal. 5 dari 8 hal. Salinan Putusan Nomor 6234/Pdt.G/2020/PA.Jr

#### Disclaimer

Kepaniteraan Mahkamah Agung Republik Indonesia berusaha untuk selalu mencantumkan informasi paling kini dan akurat sebagai bentuk komitmen Mahkamah Agung untuk pelayanan publik, transparansi dan akuntabilitas pelaksanaan fungsi peradilan. Namun dalam hal-hal tertentu masih dimungkinkan terjadi permasalahan teknis terkait dengan akurasi dan keterkinian informasi yang kami sajikan, hal mana akan terus kami perbaiki dari waktu ke waktu. Dalam hal Anda menemukan inakurasi informasi yang termuat pada situs ini atau informasi yang seharusnya ada, namun belum tersedia, maka harap segera hubungi Kepaniteraan Mahkamah Agung RI melalui : Email : kepaniteraan@mahkamahagung.go.id Telp : 021-384 3348 (ext.318)

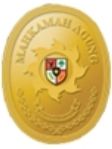

## Direktori Putusan Mahkamah Agung Republik Indonesia

putusan.mahkamahagung.go.id

menyatakan tetap pada gugatannya, dengan demikian hal tersebut telah menunjukkan bahwa di antara Penggugat dan Tergugat sudah tidak ada harapan akan hidup rukun dalam rumah tangga;

Menimbang bahwa disyariatkannya pernikahan sebagai *mitsaqon gholidhon* mempunyai tujuan yang suci dan mulia, yakni untuk menciptakan rumah tangga yang *sakinah, mawaddah dan rahmah*, sebagaimana dimaksud dalam al Qur'an surat Ar Rum ayat 21 dan pasal 1 Undang-Undang Nomor 1 tahun 1974 Jo. pasal 3 Kompilasi Hukum Islam, namun dengan keadaan rumah tangga Penggugat dan Tergugat tersebut, maka tujuan pernikahan menjadi tidak bisa dicapai;

Menimbang bahwa fakta-fakta tersebut diatas telah menunjukkan bahwa perkawinan Penggugat dan Tergugat benar-benar telah pecah dan telah sampai pada taraf yang sudah tidak bisa didamaikan lagi, karena sudah tidak adanya kehendak dari para pihak untuk melanjutkan perkawinannya, dengan demikian penyelesaian yang dipandang adil dan bermanfaat bagi kedua belah pihak adalah perceraian;

Menimbang bahwa pada dasarnya menurut ajaran Islam perceraian merupakan perbuatan tercela, namun begitu dalam keadaan suami isteri sudah tidak saling mencintai lagi dan yang terjadi hanya sikap permusuhan dan saling membenci sebagaimana yang dialami oleh Penggugat dan Tergugat tersebut, maka perceraian dibolehkan, sesuai dengan doktrin hukum Islam yang tercantum dalam Kitab Fiqih Sunnah Juz II halaman 248 :

ذهب الإمام مالك : أن الزوجة أن تطلب من القاضي التفريق إذا ادعت إضرار الزوج بها إضراراً لا يستطيع معه دوام العشرة بين أمثالهما، مثل : ضربها، أو سبها، أو إيذاها بأي نوع من أنواع الإيذاء الذي لا يطاق، أو إكراهها على المنكر من القول أو الفعل. فإذا ثبتت دعواها لدى القاضي ببينة الزوجة، أو إقرار الزوج، و كان الإيذاء مما لا يطاق معه دوام العشرة بين أمثالها و عجز القاضي عن الإصلاح بينهما طلقها طلاقاً بانه

Artinya: "Menurut Imam Malik, bahwa isteri berhak mengajukan gugatan cerai kepada hakim bila terdapat alasan bahwa suaminya telah membuatnya menderita sehingga ia tidak sanggup lagi melanjutkan bergaul dengan suaminya, misalnya karena suaminya suka memukul, memaki atau menyakiti dengan cara lain yang tidak tertahankan lagi atau memaksanya berbuat mungkar, baik tindakannya itu berupa ucapan atau perbuatan; bila dakwaan tersebut telah terbukti dengan

hal. 6 dari 8 hal. Salinan Putusan Nomor 6234/Pdt.G/2020/PA.Jr

#### Disclaimer

Kepaniteraan Mahkamah Agung Republik Indonesia berusaha untuk selalu mencantumkan informasi paling kini dan akurat sebagai bentuk komitmen Mahkamah Agung untuk pelayanan publik, transparansi dan akuntabilitas pelaksanaan fungsi peradilan. Namun dalam hal-hal tertentu masih dimungkinkan terjadi permasalahan teknis terkait dengan akurasi dan keterkinian informasi yang kami sajikan, hal mana akan terus kami perbaiki dari waktu ke waktu. Dalam hal Anda menemukan inakurasi informasi yang termuat pada situs ini atau informasi yang seharusnya ada, namun belum tersedia, maka harap segera hubungi Kepaniteraan Mahkamah Agung RI melalui : Email : [kepaniteraan@mahkamahagung.go.id](mailto:kepaniteraan@mahkamahagung.go.id) Telp : 021-384 3348 (ext.318)





# Direktori Putusan Mahkamah Agung Republik Indonesia

putusan.mahkamahagung.go.id

*dasar bukti atau pengakuan suami dan isteri telah tidak sanggup lagi mempertahankan rumah tangganya, serta hakim tidak mampu menasehatinya, maka hakim berhak menjatuhkan talak satu bain suami”.*

dan dalam Kitab Al-Anwar Juz II halaman 55 :

فَاعِن تَعَزَز بَعَزَز او تَوَار او عِيَّة جاز اثباته بالبينة

Artinya: “Apabila ia (Tergugat) enggan untuk hadir atau bersembunyi atau tidak diketahui tempat kediamannya, maka perkaranya boleh diputuskan dengan berdasarkan pada pembuktian”.

Menimbang, bahwa berdasarkan pertimbangan tersebut di atas, gugatan Penggugat telah mempunyai cukup alasan dan telah terbukti serta memenuhi pasal 39 ayat (2) Undang-Undang Nomor 1 tahun 1974 jo. Pasal 19 huruf (f) Peraturan Pemerintah Nomor 9 Tahun 1975 Jo. Pasal 116 huruf (f) Kompilasi Hukum Islam, oleh karena itu berdasarkan Pasal 125 HIR dapat dikabulkan dengan verstek;

Menimbang, bahwa berdasarkan Pasal 89 ayat (1) Undang-Undang Nomor 7 Tahun 1989 yang telah diubah dengan Undang-Undang Nomor 3 Tahun 2006 dan perubahan kedua dengan Undang-Undang Nomor 50 tahun 2009, maka biaya perkara ini dibebankan kepada Penggugat;

Memperhatikan, segala ketentuan peraturan perundang-undangan yang berlaku dan hukum syara’ yang berkaitan dengan perkara ini;

## MENGADILI

1. Menyatakan Tergugat telah dipanggil secara resmi dan patut untuk menghadap ke persidangan, tidak hadir;
2. Mengabulkan gugatan Penggugat dengan verstek;
3. Menjatuhkan talak satu ba’in sughra Tergugat (TERGUGAT) terhadap Penggugat ( Lasmiyati binti KaSerun)
4. Membebankan kepada Penggugat membayar biaya perkara sejumlah Rp. 391.000.- (tiga ratus sembilan puluh satu ribu rupiah);

Demikian diputuskan dalam permusyawaratan Majelis yang dilangsungkan pada hari Selasa tanggal 29 Desember 2020 M bertepatan dengan tanggal 15 Jumadilawal 1442 H, oleh kami Drs. Suhaili, S.H., M.H. sebagai Ketua Majelis, Drs.

hal. 7 dari 8 hal. Salinan Putusan Nomor 6234/Pdt.G/2020/PA.Jr



# Direktori Putusan Mahkamah Agung Republik Indonesia

putusan.mahkamahagung.go.id

H. Umar Jaya, S.H., M.H. dan Drs. H. Ijmak, S.H., M.H. masing-masing sebagai Hakim Anggota, putusan dibacakan dalam sidang terbuka untuk umum dengan didampingi oleh Sulaiman, S.H. sebagai Panitera Pengganti Pengadilan Agama tersebut dan dihadiri oleh Kuasa Penggugat tanpa hadirnya Tergugat;

Hakim Anggota I

Ketua Majelis

ttd

ttd

Drs. H. Umar Jaya, S.H., M.H.

Drs. Suhaili, S.H., M.H.

Hakim Anggota II

ttd

Drs. H. Ijmak, S.H., M.H.

Panitera Pengganti,

ttd

Sulaiman, S.H.

## Perincian Biaya Perkara :

- |                    |       |            |
|--------------------|-------|------------|
| 1. Pendaftaran     | : Rp. | 30.000,00  |
| 2. Biaya Proses    | : Rp. | 50.000,00  |
| 3. Biaya Panggilan | : Rp. | 275.000,00 |
| 4. Biaya PNBP      | : Rp. | 20.000,00  |
| 5. Redaksi         | : Rp. | 10.000,00  |
| 6. Materai         | : Rp. | 6.000,00   |
| Jumlah             | Rp.   | 391.000,00 |

Untuk salinan yang sama bunyinya,  
Oleh,  
Pengadilan Agama Jember  
Panitera

(tiga ratus sembilan puluh satu ribu rupiah)

**Akhmad Muzaeri, S.H.**

hal. 8 dari 8 hal. Salinan Putusan Nomor 6234/Pdt.G/2020/PA.Jr
